# Supplementary material for: High-resolution neodymium characterization along the Mediterranean margins and modelling of ε Nd distribution in the Mediterranean basins
Source: Copernicus journal article supplement (doi:10.5194/bg-13-5259-2016), 2016-09-22
Supplement: Supplementary file 1 [file bg-13-5259-2016-supplement.zip]

# **High resolution neodymium characterization along the Mediterranean margins and modeling of $\epsilon$ Nd distribution in the Mediterranean basins.**

M. Ayache<sup>1</sup>, J.-C. Dutay<sup>1</sup>, T. Arsouze<sup>2,3</sup>, S. Révillon<sup>4</sup>, J. Beuvier<sup>5,6</sup>, and C. Jeandel<sup>7</sup>

<sup>1</sup>Laboratoire des Sciences du Climat et de l'Environnement LSCE/IPSL, CEA-CNRS-UVSQ, Université Paris-Saclay, 91191 Gif-sur-Yvette, France.

<sup>2</sup>ENSTA ParisTech, Université Paris-Saclay, 828 bd des Maréchaux, 91762 Palaiseau cedex, France.

<sup>3</sup>Laboratoire de Météorologie Dynamique, École Polytechnique, Palaiseau, France.

<sup>4</sup>SEDISOR/UMR6538 "Laboratoire Domaines Océaniques", IUEM, CNRS-UBO, Plouzané, France.

<sup>5</sup>Mercator-Océan, Ramonville Saint-Agne, France.

<sup>6</sup>Météo-France, Toulouse, France.

<sup>7</sup>LEGOS, Université de Toulouse, CNRS, CNES, IRD, UPS, Toulouse, France.

Correspondence to: M. Ayache (mohamed.ayache@lsce.ipsl.fr).

## **Appendix**

**Appendix 1:** Nd isotopic composition and concentration (in  $\mu\text{g/g}$ ) of solid material used to build the map proposed in Fig. 1b. In yellow the selected data for each areas (from 1 to 67).  $\lambda$  for longitudes,  $\varphi$  for latitudes and SD for standard deviation

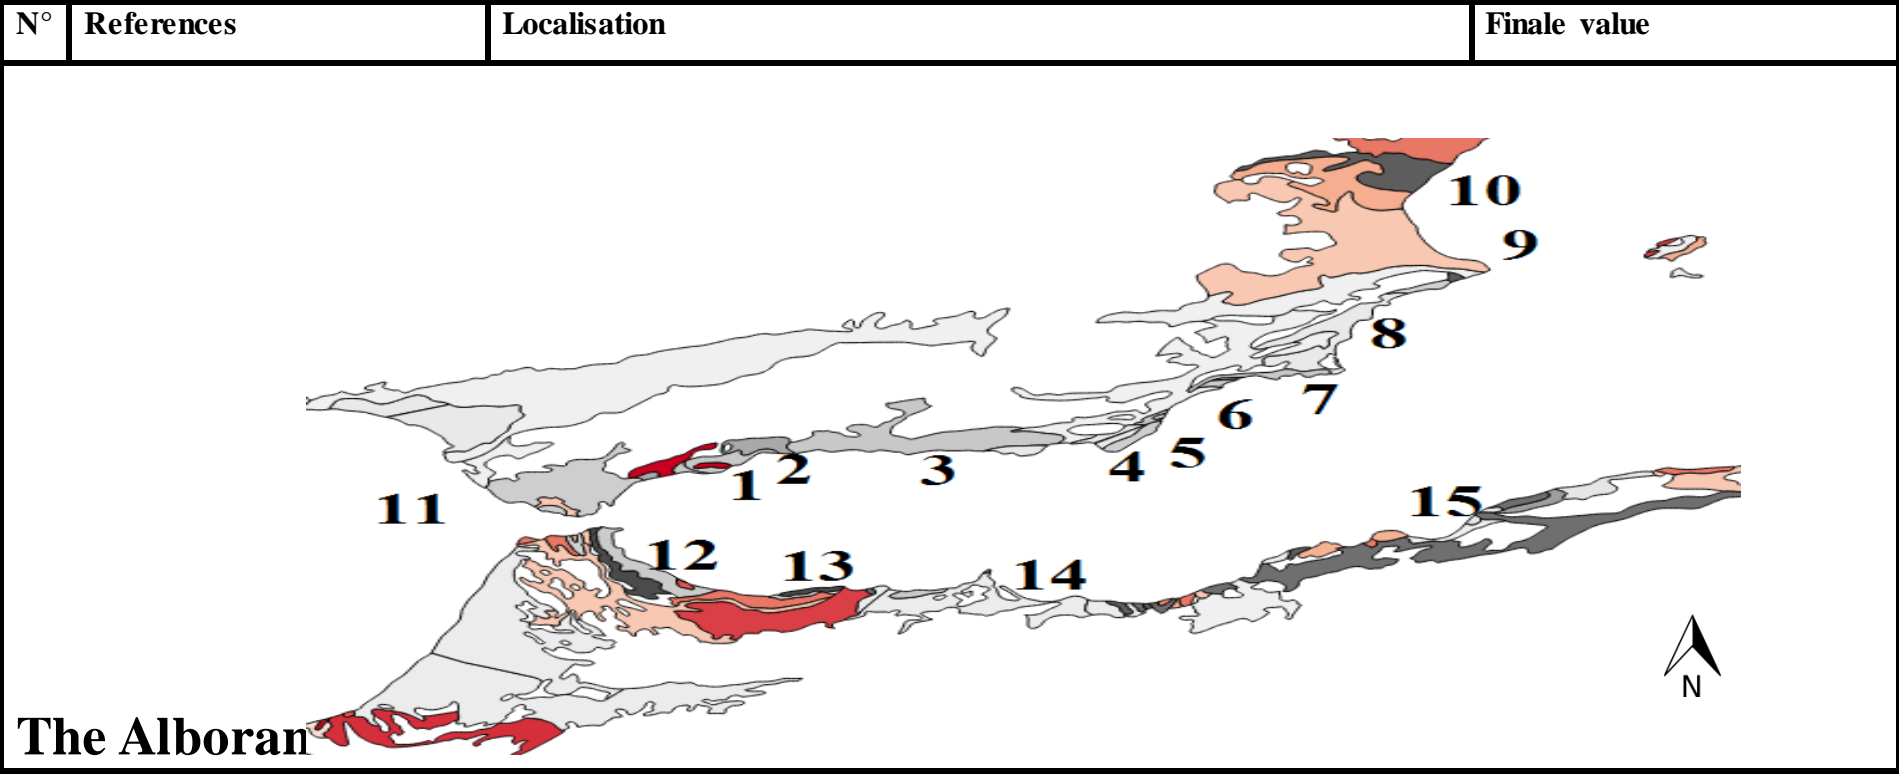

|    |                                                            |                                                                                     |                                                                                                                                                                                                               |
|----|------------------------------------------------------------|-------------------------------------------------------------------------------------|---------------------------------------------------------------------------------------------------------------------------------------------------------------------------------------------------------------|
| 01 | Duggen <i>et al.</i> , 2004                                | 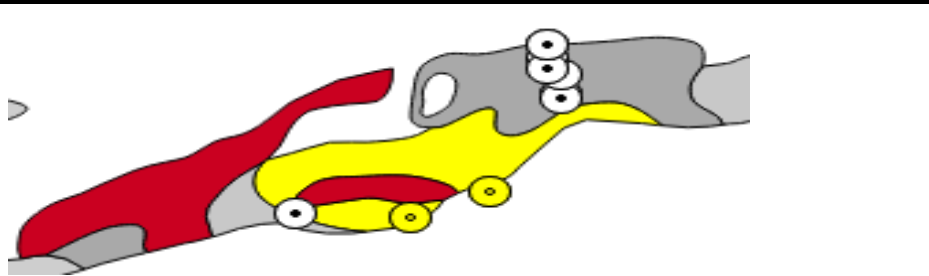  | 1 Data<br>$\epsilon\text{Nd} = -8.1$<br>$[\text{Nd}] = 36$<br><br>$\varphi$ $\lambda$<br>36,52    -4,65<br>36,58    -4,53                                                                                     |
| 02 | Turner <i>et al.</i> , 1999<br>Duggen <i>et al.</i> , 2004 |   | Average of 7 Data<br>$\epsilon\text{Nd} = +3.9$ SD = 0.7<br>$[\text{Nd}] = 6.2$ SD = 1.2<br><br>$\varphi$ $\lambda$<br>36.78    -4.43<br>36.82    -4.43<br>36.85    -4.45<br>36.83    -4.45<br>36.87    -4.45 |
| 03 | Values from sediment<br>Duggen <i>et al.</i> , 2008        |  | Average of 2 Data<br>$\epsilon\text{Nd} = -9.3$ SD = 0.1<br>$[\text{Nd}] = 47.3$ SD = 5.2<br><br>$\varphi$ $\lambda$<br>36.08    -3.540<br>36.09    -3.570                                                    |

| 04        | Zeck <i>et al.</i> 1999<br>Conticelli <i>et al.</i> 2009       | 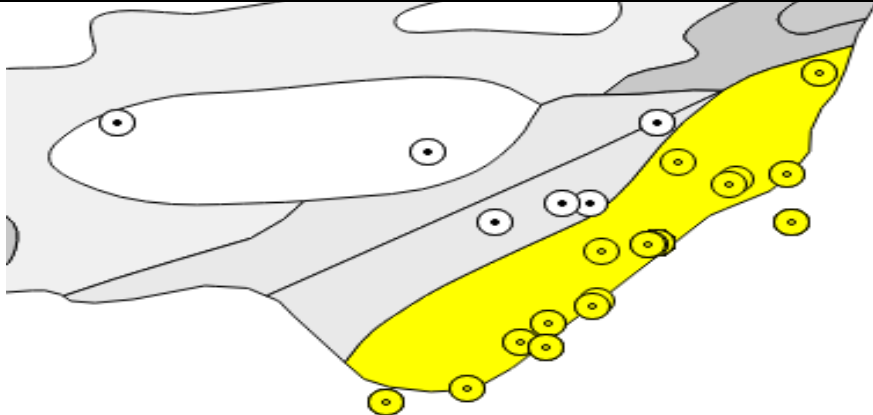   | Average of 13 Data<br>$\epsilon\text{Nd} = -7.1$ SD = 1.7<br>[Nd] = 13.3 SD = 6.2<br><br><table><tr><th><math>\varphi</math></th><th><math>\lambda</math></th></tr><tr><td>36,72</td><td>-2,2</td></tr><tr><td>36,7333</td><td>-2,14</td></tr><tr><td>36,78</td><td>-2,1</td></tr><tr><td>36,88</td><td>-2</td></tr><tr><td>36,96</td><td>-1,98</td></tr><tr><td>37,05</td><td>-1,88</td></tr><tr><td>36,93</td><td>-1,94</td></tr><tr><td>36,94</td><td>-1,94</td></tr><tr><td>36,9</td><td>-1,9</td></tr><tr><td>36,87</td><td>-2,04</td></tr><tr><td>36,87</td><td>-2,00</td></tr><tr><td>36,77</td><td>-2,08</td></tr><tr><td>36,94</td><td>-1,90</td></tr></table> | $\varphi$ | $\lambda$ | 36,72 | -2,2  | 36,7333 | -2,14 | 36,78 | -2,1 | 36,88 | -2    | 36,96 | -1,98 | 37,05 | -1,88 | 36,93 | -1,94 | 36,94 | -1,94 | 36,9 | -1,9 | 36,87 | -2,04 | 36,87 | -2,00 | 36,77 | -2,08 | 36,94 | -1,90 |
|-----------|----------------------------------------------------------------|--------------------------------------------------------------------------------------|-------------------------------------------------------------------------------------------------------------------------------------------------------------------------------------------------------------------------------------------------------------------------------------------------------------------------------------------------------------------------------------------------------------------------------------------------------------------------------------------------------------------------------------------------------------------------------------------------------------------------------------------------------------------------|-----------|-----------|-------|-------|---------|-------|-------|------|-------|-------|-------|-------|-------|-------|-------|-------|-------|-------|------|------|-------|-------|-------|-------|-------|-------|-------|-------|
| $\varphi$ | $\lambda$                                                      |                                                                                      |                                                                                                                                                                                                                                                                                                                                                                                                                                                                                                                                                                                                                                                                         |           |           |       |       |         |       |       |      |       |       |       |       |       |       |       |       |       |       |      |      |       |       |       |       |       |       |       |       |
| 36,72     | -2,2                                                           |                                                                                      |                                                                                                                                                                                                                                                                                                                                                                                                                                                                                                                                                                                                                                                                         |           |           |       |       |         |       |       |      |       |       |       |       |       |       |       |       |       |       |      |      |       |       |       |       |       |       |       |       |
| 36,7333   | -2,14                                                          |                                                                                      |                                                                                                                                                                                                                                                                                                                                                                                                                                                                                                                                                                                                                                                                         |           |           |       |       |         |       |       |      |       |       |       |       |       |       |       |       |       |       |      |      |       |       |       |       |       |       |       |       |
| 36,78     | -2,1                                                           |                                                                                      |                                                                                                                                                                                                                                                                                                                                                                                                                                                                                                                                                                                                                                                                         |           |           |       |       |         |       |       |      |       |       |       |       |       |       |       |       |       |       |      |      |       |       |       |       |       |       |       |       |
| 36,88     | -2                                                             |                                                                                      |                                                                                                                                                                                                                                                                                                                                                                                                                                                                                                                                                                                                                                                                         |           |           |       |       |         |       |       |      |       |       |       |       |       |       |       |       |       |       |      |      |       |       |       |       |       |       |       |       |
| 36,96     | -1,98                                                          |                                                                                      |                                                                                                                                                                                                                                                                                                                                                                                                                                                                                                                                                                                                                                                                         |           |           |       |       |         |       |       |      |       |       |       |       |       |       |       |       |       |       |      |      |       |       |       |       |       |       |       |       |
| 37,05     | -1,88                                                          |                                                                                      |                                                                                                                                                                                                                                                                                                                                                                                                                                                                                                                                                                                                                                                                         |           |           |       |       |         |       |       |      |       |       |       |       |       |       |       |       |       |       |      |      |       |       |       |       |       |       |       |       |
| 36,93     | -1,94                                                          |                                                                                      |                                                                                                                                                                                                                                                                                                                                                                                                                                                                                                                                                                                                                                                                         |           |           |       |       |         |       |       |      |       |       |       |       |       |       |       |       |       |       |      |      |       |       |       |       |       |       |       |       |
| 36,94     | -1,94                                                          |                                                                                      |                                                                                                                                                                                                                                                                                                                                                                                                                                                                                                                                                                                                                                                                         |           |           |       |       |         |       |       |      |       |       |       |       |       |       |       |       |       |       |      |      |       |       |       |       |       |       |       |       |
| 36,9      | -1,9                                                           |                                                                                      |                                                                                                                                                                                                                                                                                                                                                                                                                                                                                                                                                                                                                                                                         |           |           |       |       |         |       |       |      |       |       |       |       |       |       |       |       |       |       |      |      |       |       |       |       |       |       |       |       |
| 36,87     | -2,04                                                          |                                                                                      |                                                                                                                                                                                                                                                                                                                                                                                                                                                                                                                                                                                                                                                                         |           |           |       |       |         |       |       |      |       |       |       |       |       |       |       |       |       |       |      |      |       |       |       |       |       |       |       |       |
| 36,87     | -2,00                                                          |                                                                                      |                                                                                                                                                                                                                                                                                                                                                                                                                                                                                                                                                                                                                                                                         |           |           |       |       |         |       |       |      |       |       |       |       |       |       |       |       |       |       |      |      |       |       |       |       |       |       |       |       |
| 36,77     | -2,08                                                          |                                                                                      |                                                                                                                                                                                                                                                                                                                                                                                                                                                                                                                                                                                                                                                                         |           |           |       |       |         |       |       |      |       |       |       |       |       |       |       |       |       |       |      |      |       |       |       |       |       |       |       |       |
| 36,94     | -1,90                                                          |                                                                                      |                                                                                                                                                                                                                                                                                                                                                                                                                                                                                                                                                                                                                                                                         |           |           |       |       |         |       |       |      |       |       |       |       |       |       |       |       |       |       |      |      |       |       |       |       |       |       |       |       |
| 05        | Turner <i>et al.</i> , 1999<br>Conticelli <i>et al.</i> , 2009 |  | Average of 4 Data<br>$\epsilon\text{Nd} = -7.5$ SD = 1.2<br>[Nd] = 18 SD = 7<br><br><table><tr><th><math>\varphi</math></th><th><math>\lambda</math></th></tr><tr><td>36.92</td><td>-2.05</td></tr><tr><td>36.92</td><td>-2.07</td></tr><tr><td>37</td><td>-2</td></tr><tr><td>36.9</td><td>-2.12</td></tr></table>                                                                                                                                                                                                                                                                                                                                                     | $\varphi$ | $\lambda$ | 36.92 | -2.05 | 36.92   | -2.07 | 37    | -2   | 36.9  | -2.12 |       |       |       |       |       |       |       |       |      |      |       |       |       |       |       |       |       |       |
| $\varphi$ | $\lambda$                                                      |                                                                                      |                                                                                                                                                                                                                                                                                                                                                                                                                                                                                                                                                                                                                                                                         |           |           |       |       |         |       |       |      |       |       |       |       |       |       |       |       |       |       |      |      |       |       |       |       |       |       |       |       |
| 36.92     | -2.05                                                          |                                                                                      |                                                                                                                                                                                                                                                                                                                                                                                                                                                                                                                                                                                                                                                                         |           |           |       |       |         |       |       |      |       |       |       |       |       |       |       |       |       |       |      |      |       |       |       |       |       |       |       |       |
| 36.92     | -2.07                                                          |                                                                                      |                                                                                                                                                                                                                                                                                                                                                                                                                                                                                                                                                                                                                                                                         |           |           |       |       |         |       |       |      |       |       |       |       |       |       |       |       |       |       |      |      |       |       |       |       |       |       |       |       |
| 37        | -2                                                             |                                                                                      |                                                                                                                                                                                                                                                                                                                                                                                                                                                                                                                                                                                                                                                                         |           |           |       |       |         |       |       |      |       |       |       |       |       |       |       |       |       |       |      |      |       |       |       |       |       |       |       |       |
| 36.9      | -2.12                                                          |                                                                                      |                                                                                                                                                                                                                                                                                                                                                                                                                                                                                                                                                                                                                                                                         |           |           |       |       |         |       |       |      |       |       |       |       |       |       |       |       |       |       |      |      |       |       |       |       |       |       |       |       |

| 06     | Values from sediment<br>Prelevic <i>et al.</i> , 2008<br>Conticelli <i>et al.</i> , 2009                                               | 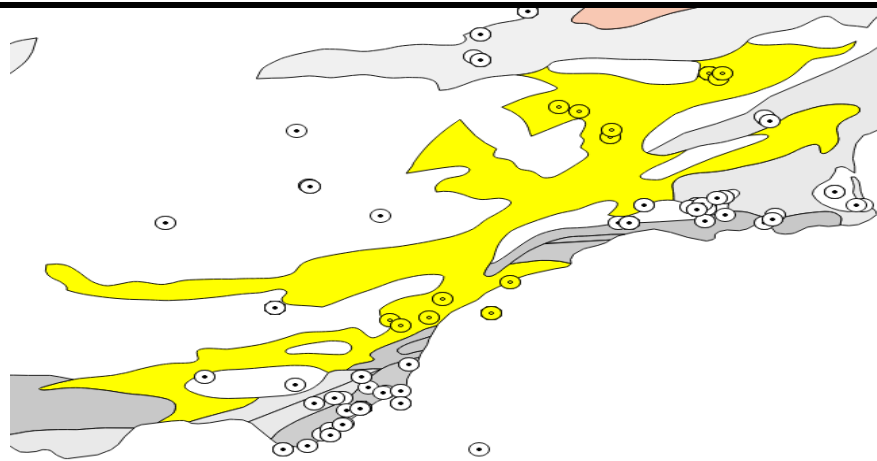  | Average of 12 Data<br>$\epsilon\text{Nd} = -12.2$ SD = 0.3<br>[Nd] = 116 SD = 2.3<br><br><table><tr><th><math>\phi</math></th><th><math>\lambda</math></th></tr><tr><td>34.05</td><td>-1.12</td></tr><tr><td>11</td><td>-1.93</td></tr><tr><td>12.8</td><td>-1.67</td></tr><tr><td>32.75</td><td>-1.12</td></tr><tr><td>12.8</td><td>-1.12</td></tr><tr><td>12.8</td><td>-1.45</td></tr><tr><td>34.05</td><td>-1.5</td></tr><tr><td>11</td><td>-1.83</td></tr><tr><td>12.8</td><td>-1.62</td></tr><tr><td>7.5</td><td>-1.67</td></tr><tr><td>12.8</td><td>-1.08</td></tr><tr><td>12.8</td><td>-1.9</td></tr></table> | $\phi$ | $\lambda$ | 34.05 | -1.12 | 11 | -1.93 | 12.8 | -1.67 | 32.75 | -1.12   | 12.8 | -1.12   | 12.8 | -1.45 | 34.05 | -1.5 | 11 | -1.83 | 12.8 | -1.62 | 7.5 | -1.67 | 12.8 | -1.08 | 12.8 | -1.9 |
|--------|----------------------------------------------------------------------------------------------------------------------------------------|-------------------------------------------------------------------------------------|----------------------------------------------------------------------------------------------------------------------------------------------------------------------------------------------------------------------------------------------------------------------------------------------------------------------------------------------------------------------------------------------------------------------------------------------------------------------------------------------------------------------------------------------------------------------------------------------------------------------|--------|-----------|-------|-------|----|-------|------|-------|-------|---------|------|---------|------|-------|-------|------|----|-------|------|-------|-----|-------|------|-------|------|------|
| $\phi$ | $\lambda$                                                                                                                              |                                                                                     |                                                                                                                                                                                                                                                                                                                                                                                                                                                                                                                                                                                                                      |        |           |       |       |    |       |      |       |       |         |      |         |      |       |       |      |    |       |      |       |     |       |      |       |      |      |
| 34.05  | -1.12                                                                                                                                  |                                                                                     |                                                                                                                                                                                                                                                                                                                                                                                                                                                                                                                                                                                                                      |        |           |       |       |    |       |      |       |       |         |      |         |      |       |       |      |    |       |      |       |     |       |      |       |      |      |
| 11     | -1.93                                                                                                                                  |                                                                                     |                                                                                                                                                                                                                                                                                                                                                                                                                                                                                                                                                                                                                      |        |           |       |       |    |       |      |       |       |         |      |         |      |       |       |      |    |       |      |       |     |       |      |       |      |      |
| 12.8   | -1.67                                                                                                                                  |                                                                                     |                                                                                                                                                                                                                                                                                                                                                                                                                                                                                                                                                                                                                      |        |           |       |       |    |       |      |       |       |         |      |         |      |       |       |      |    |       |      |       |     |       |      |       |      |      |
| 32.75  | -1.12                                                                                                                                  |                                                                                     |                                                                                                                                                                                                                                                                                                                                                                                                                                                                                                                                                                                                                      |        |           |       |       |    |       |      |       |       |         |      |         |      |       |       |      |    |       |      |       |     |       |      |       |      |      |
| 12.8   | -1.12                                                                                                                                  |                                                                                     |                                                                                                                                                                                                                                                                                                                                                                                                                                                                                                                                                                                                                      |        |           |       |       |    |       |      |       |       |         |      |         |      |       |       |      |    |       |      |       |     |       |      |       |      |      |
| 12.8   | -1.45                                                                                                                                  |                                                                                     |                                                                                                                                                                                                                                                                                                                                                                                                                                                                                                                                                                                                                      |        |           |       |       |    |       |      |       |       |         |      |         |      |       |       |      |    |       |      |       |     |       |      |       |      |      |
| 34.05  | -1.5                                                                                                                                   |                                                                                     |                                                                                                                                                                                                                                                                                                                                                                                                                                                                                                                                                                                                                      |        |           |       |       |    |       |      |       |       |         |      |         |      |       |       |      |    |       |      |       |     |       |      |       |      |      |
| 11     | -1.83                                                                                                                                  |                                                                                     |                                                                                                                                                                                                                                                                                                                                                                                                                                                                                                                                                                                                                      |        |           |       |       |    |       |      |       |       |         |      |         |      |       |       |      |    |       |      |       |     |       |      |       |      |      |
| 12.8   | -1.62                                                                                                                                  |                                                                                     |                                                                                                                                                                                                                                                                                                                                                                                                                                                                                                                                                                                                                      |        |           |       |       |    |       |      |       |       |         |      |         |      |       |       |      |    |       |      |       |     |       |      |       |      |      |
| 7.5    | -1.67                                                                                                                                  |                                                                                     |                                                                                                                                                                                                                                                                                                                                                                                                                                                                                                                                                                                                                      |        |           |       |       |    |       |      |       |       |         |      |         |      |       |       |      |    |       |      |       |     |       |      |       |      |      |
| 12.8   | -1.08                                                                                                                                  |                                                                                     |                                                                                                                                                                                                                                                                                                                                                                                                                                                                                                                                                                                                                      |        |           |       |       |    |       |      |       |       |         |      |         |      |       |       |      |    |       |      |       |     |       |      |       |      |      |
| 12.8   | -1.9                                                                                                                                   |                                                                                     |                                                                                                                                                                                                                                                                                                                                                                                                                                                                                                                                                                                                                      |        |           |       |       |    |       |      |       |       |         |      |         |      |       |       |      |    |       |      |       |     |       |      |       |      |      |
| 07     | Prelevic <i>et al.</i> , 2008<br><br>We don't represented data<br>from :<br>CEBRIA <i>et al.</i> , 2009<br>DUGGEN <i>et al.</i> , 2005 |  | Average of 6 Data<br>$\epsilon\text{Nd} = -11.3$ SD = 0.2<br>[Nd] = 94 SD = 28<br><br><table><tr><th><math>\phi</math></th><th><math>\lambda</math></th></tr><tr><td>34.05</td><td>-1.32</td></tr><tr><td>11</td><td>-1.35</td></tr><tr><td>3.95</td><td>-1.32</td></tr><tr><td>12.8</td><td>-1.0772</td></tr><tr><td>12.8</td><td>-0.9567</td></tr><tr><td>12.8</td><td>-1.13</td></tr></table>                                                                                                                                                                                                                     | $\phi$ | $\lambda$ | 34.05 | -1.32 | 11 | -1.35 | 3.95 | -1.32 | 12.8  | -1.0772 | 12.8 | -0.9567 | 12.8 | -1.13 |       |      |    |       |      |       |     |       |      |       |      |      |
| $\phi$ | $\lambda$                                                                                                                              |                                                                                     |                                                                                                                                                                                                                                                                                                                                                                                                                                                                                                                                                                                                                      |        |           |       |       |    |       |      |       |       |         |      |         |      |       |       |      |    |       |      |       |     |       |      |       |      |      |
| 34.05  | -1.32                                                                                                                                  |                                                                                     |                                                                                                                                                                                                                                                                                                                                                                                                                                                                                                                                                                                                                      |        |           |       |       |    |       |      |       |       |         |      |         |      |       |       |      |    |       |      |       |     |       |      |       |      |      |
| 11     | -1.35                                                                                                                                  |                                                                                     |                                                                                                                                                                                                                                                                                                                                                                                                                                                                                                                                                                                                                      |        |           |       |       |    |       |      |       |       |         |      |         |      |       |       |      |    |       |      |       |     |       |      |       |      |      |
| 3.95   | -1.32                                                                                                                                  |                                                                                     |                                                                                                                                                                                                                                                                                                                                                                                                                                                                                                                                                                                                                      |        |           |       |       |    |       |      |       |       |         |      |         |      |       |       |      |    |       |      |       |     |       |      |       |      |      |
| 12.8   | -1.0772                                                                                                                                |                                                                                     |                                                                                                                                                                                                                                                                                                                                                                                                                                                                                                                                                                                                                      |        |           |       |       |    |       |      |       |       |         |      |         |      |       |       |      |    |       |      |       |     |       |      |       |      |      |
| 12.8   | -0.9567                                                                                                                                |                                                                                     |                                                                                                                                                                                                                                                                                                                                                                                                                                                                                                                                                                                                                      |        |           |       |       |    |       |      |       |       |         |      |         |      |       |       |      |    |       |      |       |     |       |      |       |      |      |
| 12.8   | -1.13                                                                                                                                  |                                                                                     |                                                                                                                                                                                                                                                                                                                                                                                                                                                                                                                                                                                                                      |        |           |       |       |    |       |      |       |       |         |      |         |      |       |       |      |    |       |      |       |     |       |      |       |      |      |

| 08     | Conticelli <i>et al.</i> , 2009<br>Duggen <i>et al.</i> , 2005                                                                                                                                               | 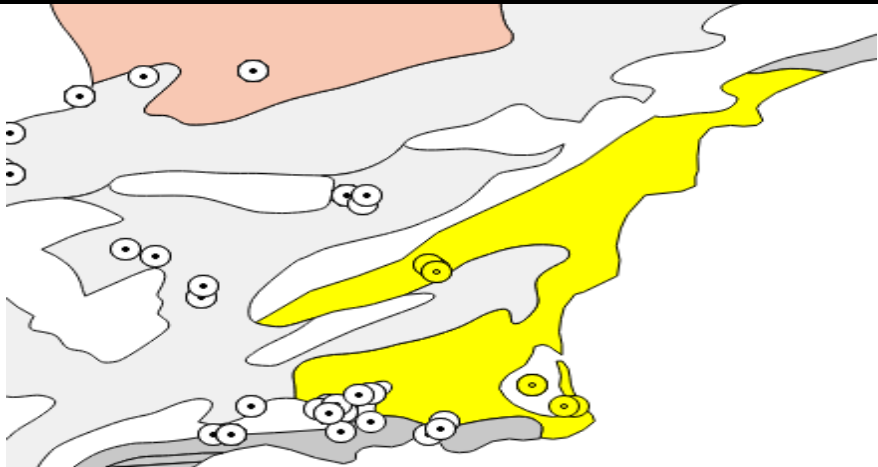  | Average of 3 Data<br>$\epsilon\text{Nd} = -10.6$ SD = 1<br>[Nd] = 52 SD = 33<br><br><table><tr><th><math>\phi</math></th><th><math>\lambda</math></th></tr><tr><td>12.8</td><td>-0.97</td></tr><tr><td>11</td><td>-0.8</td></tr><tr><td>12.8</td><td>-0.9637</td></tr></table>                                                                                                             | $\phi$ | $\lambda$ | 12.8  | -0.97 | 11 | -0.8  | 12.8  | -0.9637 |      |       |     |       |     |      |
|--------|--------------------------------------------------------------------------------------------------------------------------------------------------------------------------------------------------------------|-------------------------------------------------------------------------------------|--------------------------------------------------------------------------------------------------------------------------------------------------------------------------------------------------------------------------------------------------------------------------------------------------------------------------------------------------------------------------------------------|--------|-----------|-------|-------|----|-------|-------|---------|------|-------|-----|-------|-----|------|
| $\phi$ | $\lambda$                                                                                                                                                                                                    |                                                                                     |                                                                                                                                                                                                                                                                                                                                                                                            |        |           |       |       |    |       |       |         |      |       |     |       |     |      |
| 12.8   | -0.97                                                                                                                                                                                                        |                                                                                     |                                                                                                                                                                                                                                                                                                                                                                                            |        |           |       |       |    |       |       |         |      |       |     |       |     |      |
| 11     | -0.8                                                                                                                                                                                                         |                                                                                     |                                                                                                                                                                                                                                                                                                                                                                                            |        |           |       |       |    |       |       |         |      |       |     |       |     |      |
| 12.8   | -0.9637                                                                                                                                                                                                      |                                                                                     |                                                                                                                                                                                                                                                                                                                                                                                            |        |           |       |       |    |       |       |         |      |       |     |       |     |      |
| 09     | Prelevic <i>et al.</i> , 2008<br>Conticelli <i>et al.</i> , 2009<br>Benito garcia <i>et al.</i> , 1999<br>Duggen <i>et al.</i> , 2005<br><br>We don't represented data from :<br>Nelson <i>et al.</i> , 1986 |  | Average of 15 Data<br>$\epsilon\text{Nd} = -11.2$ SD = 1.3<br>[Nd] = 17 SD = 16<br><br><table><tr><th><math>\phi</math></th><th><math>\lambda</math></th></tr><tr><td>34.05</td><td>-1.58</td></tr><tr><td>11</td><td>-1.58</td></tr><tr><td>34.05</td><td>-1.7</td></tr><tr><td>12.8</td><td>-1.28</td></tr><tr><td>7.5</td><td>-1.28</td></tr><tr><td>7.5</td><td>-1.7</td></tr></table> | $\phi$ | $\lambda$ | 34.05 | -1.58 | 11 | -1.58 | 34.05 | -1.7    | 12.8 | -1.28 | 7.5 | -1.28 | 7.5 | -1.7 |
| $\phi$ | $\lambda$                                                                                                                                                                                                    |                                                                                     |                                                                                                                                                                                                                                                                                                                                                                                            |        |           |       |       |    |       |       |         |      |       |     |       |     |      |
| 34.05  | -1.58                                                                                                                                                                                                        |                                                                                     |                                                                                                                                                                                                                                                                                                                                                                                            |        |           |       |       |    |       |       |         |      |       |     |       |     |      |
| 11     | -1.58                                                                                                                                                                                                        |                                                                                     |                                                                                                                                                                                                                                                                                                                                                                                            |        |           |       |       |    |       |       |         |      |       |     |       |     |      |
| 34.05  | -1.7                                                                                                                                                                                                         |                                                                                     |                                                                                                                                                                                                                                                                                                                                                                                            |        |           |       |       |    |       |       |         |      |       |     |       |     |      |
| 12.8   | -1.28                                                                                                                                                                                                        |                                                                                     |                                                                                                                                                                                                                                                                                                                                                                                            |        |           |       |       |    |       |       |         |      |       |     |       |     |      |
| 7.5    | -1.28                                                                                                                                                                                                        |                                                                                     |                                                                                                                                                                                                                                                                                                                                                                                            |        |           |       |       |    |       |       |         |      |       |     |       |     |      |
| 7.5    | -1.7                                                                                                                                                                                                         |                                                                                     |                                                                                                                                                                                                                                                                                                                                                                                            |        |           |       |       |    |       |       |         |      |       |     |       |     |      |

|           |                                                      |                                                                                     |                                                                                                                                                                                                                                                          |           |           |    |     |       |      |
|-----------|------------------------------------------------------|-------------------------------------------------------------------------------------|----------------------------------------------------------------------------------------------------------------------------------------------------------------------------------------------------------------------------------------------------------|-----------|-----------|----|-----|-------|------|
| 10        | Values from sediment<br>Gilbert <i>et al.</i> , 1994 | 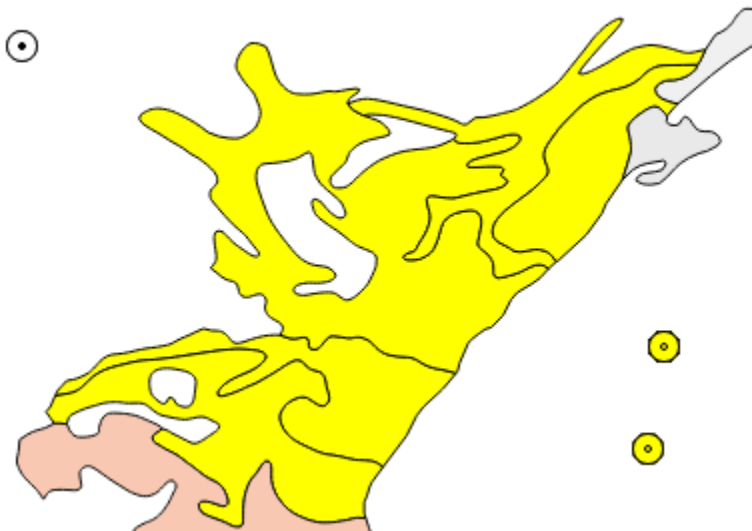  | Average of 14 Data<br>$\epsilon\text{Nd} = -9.9$ SD = 1.4<br>$[\text{Nd}] = 30.5$ SD = 8.2<br><br><table><tr><td><math>\varphi</math></td><td><math>\lambda</math></td></tr><tr><td>40</td><td>0.7</td></tr><tr><td>39.65</td><td>0.65</td></tr></table> | $\varphi$ | $\lambda$ | 40 | 0.7 | 39.65 | 0.65 |
| $\varphi$ | $\lambda$                                            |                                                                                     |                                                                                                                                                                                                                                                          |           |           |    |     |       |      |
| 40        | 0.7                                                  |                                                                                     |                                                                                                                                                                                                                                                          |           |           |    |     |       |      |
| 39.65     | 0.65                                                 |                                                                                     |                                                                                                                                                                                                                                                          |           |           |    |     |       |      |
| 11        | Lopez-guijarro <i>et al.</i> , 2008                  |  | 1 Data<br>$\epsilon\text{Nd} = -7.9$<br>$[\text{Nd}] = 94.2$<br><br><table><tr><td><math>\varphi</math></td><td><math>\lambda</math></td></tr><tr><td>36</td><td>-6</td></tr></table>                                                                    | $\varphi$ | $\lambda$ | 36 | -6  |       |      |
| $\varphi$ | $\lambda$                                            |                                                                                     |                                                                                                                                                                                                                                                          |           |           |    |     |       |      |
| 36        | -6                                                   |                                                                                     |                                                                                                                                                                                                                                                          |           |           |    |     |       |      |

|    |                                                                                            |                                                                                     |                                                                                                                                                                                                                                                                                                                                |
|----|--------------------------------------------------------------------------------------------|-------------------------------------------------------------------------------------|--------------------------------------------------------------------------------------------------------------------------------------------------------------------------------------------------------------------------------------------------------------------------------------------------------------------------------|
| 12 | Gill <i>et al.</i> , 2004                                                                  | 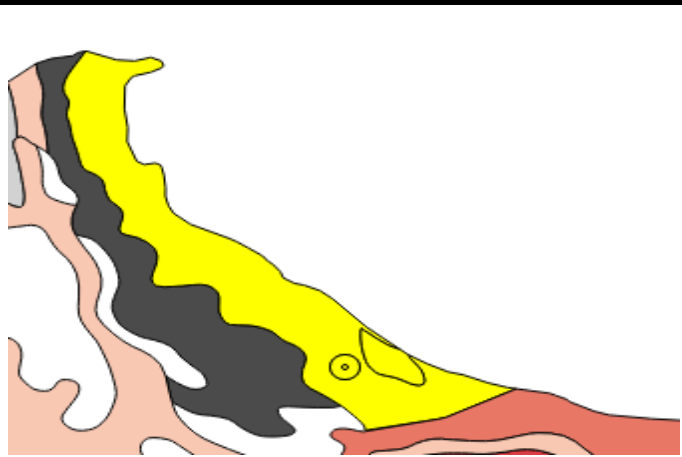  | 1 Data<br>$\epsilon\text{Nd} = -8.9$<br>$[\text{Nd}] = 30$<br><br><div> <math>\varphi</math><br/> 35.25 </div> <div> <math>\lambda</math><br/> -4.96 </div>                                                                                                                                                                    |
| 13 | Elazzouzi <i>et al.</i> , 1999<br>Duggen <i>et al.</i> , 2005<br>Gill <i>et al.</i> , 2004 |  | Average of 5 Data<br>$\epsilon\text{Nd} = -4.8$ SD = 0.7<br>$[\text{Nd}] = 32.3$ SD = 10<br><br><div> <math>\varphi</math><br/> 12.8<br/> 12.8<br/> 12.8<br/> 12.8<br/> 12.8<br/> 12.8<br/> 14.15 </div> <div> <math>\lambda</math><br/> -3.7545<br/> -3.95<br/> -3.8<br/> -3.68<br/> -3.7557<br/> -3.7338<br/> -4.2133 </div> |

| 14     | Duggen <i>et al.</i> , 2005                          |  | 1 data<br>$\epsilon\text{Nd} = -7.8$<br>$[\text{Nd}] = 38.6$ SD = 12<br><br><table><tr><th><math>\phi</math></th><th><math>\lambda</math></th></tr><tr><td>35.47</td><td>-0.4</td></tr><tr><td>35.3</td><td>-1.47</td></tr><tr><td>35.5</td><td>-1.2</td></tr></table>                                                                                                                                                                                                       | $\phi$ | $\lambda$ | 35.47 | -0.4 | 35.3  | -1.47 | 35.5  | -1.2 |       |      |       |      |       |      |       |     |       |      |
|--------|------------------------------------------------------|------------------------------------------------------------------------------------|------------------------------------------------------------------------------------------------------------------------------------------------------------------------------------------------------------------------------------------------------------------------------------------------------------------------------------------------------------------------------------------------------------------------------------------------------------------------------|--------|-----------|-------|------|-------|-------|-------|------|-------|------|-------|------|-------|------|-------|-----|-------|------|
| $\phi$ | $\lambda$                                            |                                                                                    |                                                                                                                                                                                                                                                                                                                                                                                                                                                                              |        |           |       |      |       |       |       |      |       |      |       |      |       |      |       |     |       |      |
| 35.47  | -0.4                                                 |                                                                                    |                                                                                                                                                                                                                                                                                                                                                                                                                                                                              |        |           |       |      |       |       |       |      |       |      |       |      |       |      |       |     |       |      |
| 35.3   | -1.47                                                |                                                                                    |                                                                                                                                                                                                                                                                                                                                                                                                                                                                              |        |           |       |      |       |       |       |      |       |      |       |      |       |      |       |     |       |      |
| 35.5   | -1.2                                                 |                                                                                    |                                                                                                                                                                                                                                                                                                                                                                                                                                                                              |        |           |       |      |       |       |       |      |       |      |       |      |       |      |       |     |       |      |
| 15     | Values from sediment<br>Toscani <i>et al.</i> , 1990 |  | Average of 5 Data<br>$\epsilon\text{Nd} = -11$ SD = 0.5<br>$[\text{Nd}] = 15.3$ SD = 5<br><br><table><tr><th><math>\phi</math></th><th><math>\lambda</math></th></tr><tr><td>36.78</td><td>1.59</td></tr><tr><td>36.73</td><td>1.55</td></tr><tr><td>36.84</td><td>1.78</td></tr><tr><td>36.88</td><td>1.68</td></tr><tr><td>36.88</td><td>1.65</td></tr><tr><td>36.88</td><td>1.65</td></tr><tr><td>36.85</td><td>2.1</td></tr><tr><td>36.93</td><td>1.78</td></tr></table> | $\phi$ | $\lambda$ | 36.78 | 1.59 | 36.73 | 1.55  | 36.84 | 1.78 | 36.88 | 1.68 | 36.88 | 1.65 | 36.88 | 1.65 | 36.85 | 2.1 | 36.93 | 1.78 |
| $\phi$ | $\lambda$                                            |                                                                                    |                                                                                                                                                                                                                                                                                                                                                                                                                                                                              |        |           |       |      |       |       |       |      |       |      |       |      |       |      |       |     |       |      |
| 36.78  | 1.59                                                 |                                                                                    |                                                                                                                                                                                                                                                                                                                                                                                                                                                                              |        |           |       |      |       |       |       |      |       |      |       |      |       |      |       |     |       |      |
| 36.73  | 1.55                                                 |                                                                                    |                                                                                                                                                                                                                                                                                                                                                                                                                                                                              |        |           |       |      |       |       |       |      |       |      |       |      |       |      |       |     |       |      |
| 36.84  | 1.78                                                 |                                                                                    |                                                                                                                                                                                                                                                                                                                                                                                                                                                                              |        |           |       |      |       |       |       |      |       |      |       |      |       |      |       |     |       |      |
| 36.88  | 1.68                                                 |                                                                                    |                                                                                                                                                                                                                                                                                                                                                                                                                                                                              |        |           |       |      |       |       |       |      |       |      |       |      |       |      |       |     |       |      |
| 36.88  | 1.65                                                 |                                                                                    |                                                                                                                                                                                                                                                                                                                                                                                                                                                                              |        |           |       |      |       |       |       |      |       |      |       |      |       |      |       |     |       |      |
| 36.88  | 1.65                                                 |                                                                                    |                                                                                                                                                                                                                                                                                                                                                                                                                                                                              |        |           |       |      |       |       |       |      |       |      |       |      |       |      |       |     |       |      |
| 36.85  | 2.1                                                  |                                                                                    |                                                                                                                                                                                                                                                                                                                                                                                                                                                                              |        |           |       |      |       |       |       |      |       |      |       |      |       |      |       |     |       |      |
| 36.93  | 1.78                                                 |                                                                                    |                                                                                                                                                                                                                                                                                                                                                                                                                                                                              |        |           |       |      |       |       |       |      |       |      |       |      |       |      |       |     |       |      |

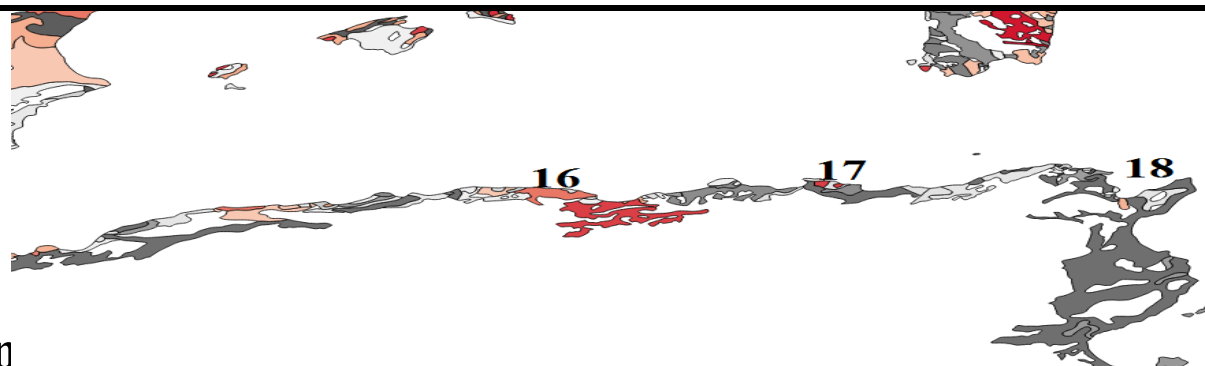

## The Algerian sub-basin

| 16     | Belanteur <i>et al.</i> , 1995 | 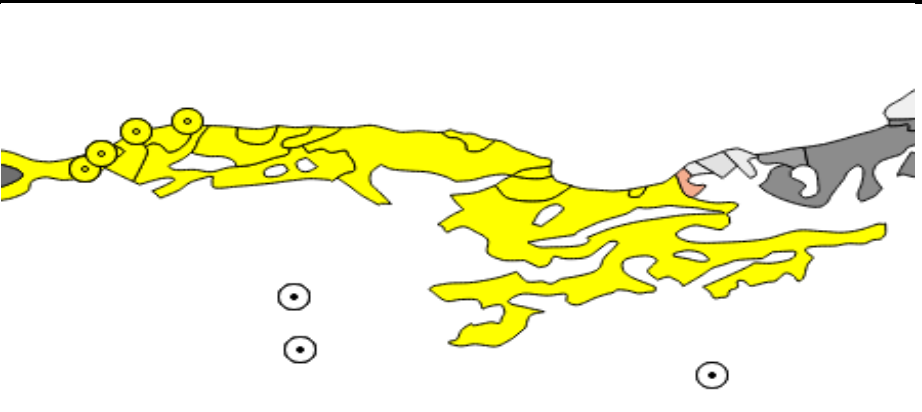  | Average of 2 Data<br>$\epsilon\text{Nd} = -10.5$ SD = 0.3<br>$[\text{Nd}] = 15.3$ SD = 5<br><br><table><thead><tr><th><math>\phi</math></th><th><math>\lambda</math></th></tr></thead><tbody><tr><td>3.89</td><td>14.15</td></tr><tr><td>3.72</td><td>14.15</td></tr><tr><td>3.55</td><td>14.15</td></tr><tr><td>3.6</td><td>14.15</td></tr></tbody></table> | $\phi$ | $\lambda$ | 3.89 | 14.15 | 3.72 | 14.15 | 3.55 | 14.15 | 3.6 | 14.15 |
|--------|--------------------------------|--------------------------------------------------------------------------------------|--------------------------------------------------------------------------------------------------------------------------------------------------------------------------------------------------------------------------------------------------------------------------------------------------------------------------------------------------------------|--------|-----------|------|-------|------|-------|------|-------|-----|-------|
| $\phi$ | $\lambda$                      |                                                                                      |                                                                                                                                                                                                                                                                                                                                                              |        |           |      |       |      |       |      |       |     |       |
| 3.89   | 14.15                          |                                                                                      |                                                                                                                                                                                                                                                                                                                                                              |        |           |      |       |      |       |      |       |     |       |
| 3.72   | 14.15                          |                                                                                      |                                                                                                                                                                                                                                                                                                                                                              |        |           |      |       |      |       |      |       |     |       |
| 3.55   | 14.15                          |                                                                                      |                                                                                                                                                                                                                                                                                                                                                              |        |           |      |       |      |       |      |       |     |       |
| 3.6    | 14.15                          |                                                                                      |                                                                                                                                                                                                                                                                                                                                                              |        |           |      |       |      |       |      |       |     |       |
| 17     | Juteau <i>et al.</i> , 1986    |  | Average of 3 Data<br>$\epsilon\text{Nd} = -10.3$ SD = 0.6<br>$[\text{Nd}] = 14.8$ SD = 3.3                                                                                                                                                                                                                                                                   |        |           |      |       |      |       |      |       |     |       |

|                                                                                                                              |                                                          |                                                                                      |                                                                                                                                                                                                                                                 |           |           |    |     |       |      |
|------------------------------------------------------------------------------------------------------------------------------|----------------------------------------------------------|--------------------------------------------------------------------------------------|-------------------------------------------------------------------------------------------------------------------------------------------------------------------------------------------------------------------------------------------------|-----------|-----------|----|-----|-------|------|
| 18                                                                                                                           | Juteau <i>et al</i> ,1986                                | 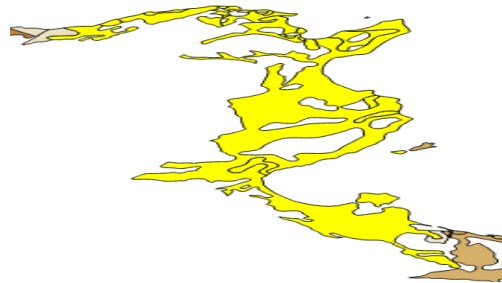   | Same values as in the Algerian sub-basin.<br><br>$\epsilon\text{Nd} = -10.3$ SD = 0.6<br>[Nd] = 14.8 SD = 3.3                                                                                                                                   |           |           |    |     |       |      |
| <div>The Liguro-Provençal sub basin</div>  |                                                          |                                                                                      |                                                                                                                                                                                                                                                 |           |           |    |     |       |      |
| 19                                                                                                                           | Values from sediment<br><br>Gilbert <i>et al.</i> , 1994 |  | Average of 14 Data<br>$\epsilon\text{Nd} = -9.9$ SD = 1.3<br>[Nd] = 30.2 SD = 8.5<br><br><table><tr><td><math>\varphi</math></td><td><math>\lambda</math></td></tr><tr><td>40</td><td>0.7</td></tr><tr><td>39.65</td><td>0.65</td></tr></table> | $\varphi$ | $\lambda$ | 40 | 0.7 | 39.65 | 0.65 |
| $\varphi$                                                                                                                    | $\lambda$                                                |                                                                                      |                                                                                                                                                                                                                                                 |           |           |    |     |       |      |
| 40                                                                                                                           | 0.7                                                      |                                                                                      |                                                                                                                                                                                                                                                 |           |           |    |     |       |      |
| 39.65                                                                                                                        | 0.65                                                     |                                                                                      |                                                                                                                                                                                                                                                 |           |           |    |     |       |      |

|        |                                                           |                                                                                     |                                                                                                                                                                                                                                                                                                                                                                                          |        |           |       |      |       |      |       |      |       |      |       |      |
|--------|-----------------------------------------------------------|-------------------------------------------------------------------------------------|------------------------------------------------------------------------------------------------------------------------------------------------------------------------------------------------------------------------------------------------------------------------------------------------------------------------------------------------------------------------------------------|--------|-----------|-------|------|-------|------|-------|------|-------|------|-------|------|
| 20     | Navidad <i>et al.</i> , 2010                              | 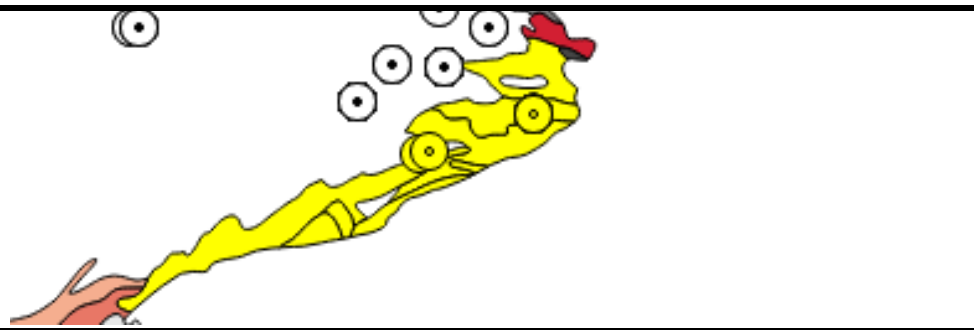  | Average of 3 Data<br>$\epsilon\text{Nd} = -8.3$ $\text{SD} = 0.2$<br>$[\text{Nd}] = 28$ $\text{SD} = 12$<br><br><table><tr><td><math>\phi</math></td><td><math>\lambda</math></td></tr><tr><td>41.7</td><td>2.35</td></tr><tr><td>41.72</td><td>2.4</td></tr><tr><td>41.92</td><td>2.98</td></tr></table>                                                                                | $\phi$ | $\lambda$ | 41.7  | 2.35 | 41.72 | 2.4  | 41.92 | 2.98 |       |      |       |      |
| $\phi$ | $\lambda$                                                 |                                                                                     |                                                                                                                                                                                                                                                                                                                                                                                          |        |           |       |      |       |      |       |      |       |      |       |      |
| 41.7   | 2.35                                                      |                                                                                     |                                                                                                                                                                                                                                                                                                                                                                                          |        |           |       |      |       |      |       |      |       |      |       |      |
| 41.72  | 2.4                                                       |                                                                                     |                                                                                                                                                                                                                                                                                                                                                                                          |        |           |       |      |       |      |       |      |       |      |       |      |
| 41.92  | 2.98                                                      |                                                                                     |                                                                                                                                                                                                                                                                                                                                                                                          |        |           |       |      |       |      |       |      |       |      |       |      |
| 21     | Values from sediment<br><br>Revillon <i>et al.</i> , 2011 |  | Average of 24 Data<br>$\epsilon\text{Nd} = -10.9$ $\text{SD} = 0.4$<br>$[\text{Nd}] = 12.8$ $\text{SD} = 9.2$<br><br><table><tr><td><math>\phi</math></td><td><math>\lambda</math></td></tr><tr><td>43,62</td><td>3,43</td></tr><tr><td>43,35</td><td>4,41</td></tr><tr><td>43,32</td><td>4,17</td></tr><tr><td>42,68</td><td>3,86</td></tr><tr><td>43,01</td><td>3,30</td></tr></table> | $\phi$ | $\lambda$ | 43,62 | 3,43 | 43,35 | 4,41 | 43,32 | 4,17 | 42,68 | 3,86 | 43,01 | 3,30 |
| $\phi$ | $\lambda$                                                 |                                                                                     |                                                                                                                                                                                                                                                                                                                                                                                          |        |           |       |      |       |      |       |      |       |      |       |      |
| 43,62  | 3,43                                                      |                                                                                     |                                                                                                                                                                                                                                                                                                                                                                                          |        |           |       |      |       |      |       |      |       |      |       |      |
| 43,35  | 4,41                                                      |                                                                                     |                                                                                                                                                                                                                                                                                                                                                                                          |        |           |       |      |       |      |       |      |       |      |       |      |
| 43,32  | 4,17                                                      |                                                                                     |                                                                                                                                                                                                                                                                                                                                                                                          |        |           |       |      |       |      |       |      |       |      |       |      |
| 42,68  | 3,86                                                      |                                                                                     |                                                                                                                                                                                                                                                                                                                                                                                          |        |           |       |      |       |      |       |      |       |      |       |      |
| 43,01  | 3,30                                                      |                                                                                     |                                                                                                                                                                                                                                                                                                                                                                                          |        |           |       |      |       |      |       |      |       |      |       |      |

| 22                                         | <p>Rhone river:<br/>Peccerillo <i>et al.</i>, 2006</p> <p>We don't represented data<br/>from :<br/>Lustrino <i>et al.</i>, 2007</p> |  | <p>Average of 3 Data<br/><math>\epsilon\text{Nd} = -10.8</math> SD = 0.6<br/><math>[\text{Nd}] = 85.9</math> SD = 57.1</p> <table><tr><th><math>\varphi</math></th><th><math>\lambda</math></th></tr><tr><td>44.75</td><td>6.91</td></tr><tr><td>43.2</td><td>6.2</td></tr><tr><td>43.17</td><td>5.87</td></tr><tr><td>44.85</td><td>6.82</td></tr><tr><td>45</td><td>7</td></tr></table> | $\varphi$ | $\lambda$ | 44.75 | 6.91 | 43.2 | 6.2 | 43.17 | 5.87 | 44.85 | 6.82 | 45 | 7 |
|--------------------------------------------|-------------------------------------------------------------------------------------------------------------------------------------|------------------------------------------------------------------------------------|-------------------------------------------------------------------------------------------------------------------------------------------------------------------------------------------------------------------------------------------------------------------------------------------------------------------------------------------------------------------------------------------|-----------|-----------|-------|------|------|-----|-------|------|-------|------|----|---|
| $\varphi$                                  | $\lambda$                                                                                                                           |                                                                                    |                                                                                                                                                                                                                                                                                                                                                                                           |           |           |       |      |      |     |       |      |       |      |    |   |
| 44.75                                      | 6.91                                                                                                                                |                                                                                    |                                                                                                                                                                                                                                                                                                                                                                                           |           |           |       |      |      |     |       |      |       |      |    |   |
| 43.2                                       | 6.2                                                                                                                                 |                                                                                    |                                                                                                                                                                                                                                                                                                                                                                                           |           |           |       |      |      |     |       |      |       |      |    |   |
| 43.17                                      | 5.87                                                                                                                                |                                                                                    |                                                                                                                                                                                                                                                                                                                                                                                           |           |           |       |      |      |     |       |      |       |      |    |   |
| 44.85                                      | 6.82                                                                                                                                |                                                                                    |                                                                                                                                                                                                                                                                                                                                                                                           |           |           |       |      |      |     |       |      |       |      |    |   |
| 45                                         | 7                                                                                                                                   |                                                                                    |                                                                                                                                                                                                                                                                                                                                                                                           |           |           |       |      |      |     |       |      |       |      |    |   |
| <p><b>The Tyrrhenian<br/>sub-basin</b></p> |                                                                                                                                     |                                                                                    |                                                                                                                                                                                                                                                                                                                                                                                           |           |           |       |      |      |     |       |      |       |      |    |   |

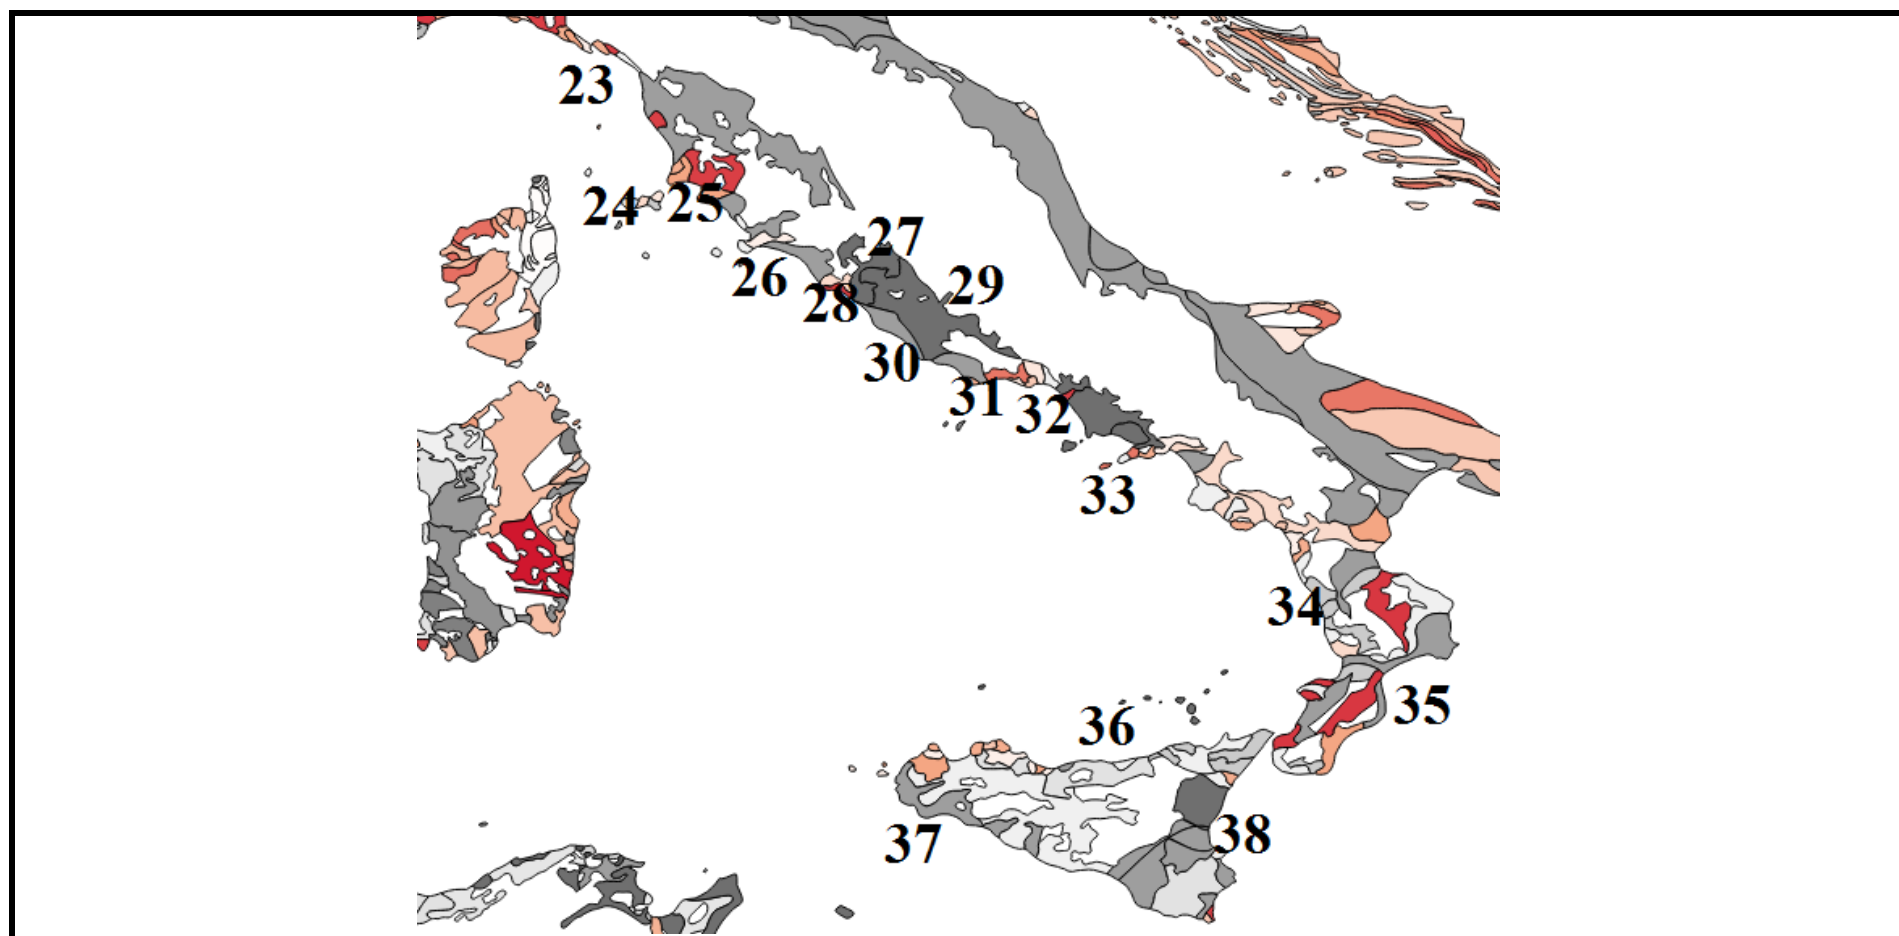

|           |                                                                                                                                                                          |                                                                                     |                                                                                                                                                                                                                                                                                                                                                                                                                                                                                    |           |           |       |       |       |       |       |       |       |       |       |       |       |       |       |       |       |       |
|-----------|--------------------------------------------------------------------------------------------------------------------------------------------------------------------------|-------------------------------------------------------------------------------------|------------------------------------------------------------------------------------------------------------------------------------------------------------------------------------------------------------------------------------------------------------------------------------------------------------------------------------------------------------------------------------------------------------------------------------------------------------------------------------|-----------|-----------|-------|-------|-------|-------|-------|-------|-------|-------|-------|-------|-------|-------|-------|-------|-------|-------|
| 23        | Conticelli <i>et al.</i> , 1992<br>Conticelli <i>et al.</i> , 2002<br>Conticelli <i>et al.</i> , 2009<br>Deastis <i>et al.</i> , 2000<br>Peccerillo <i>et al.</i> , 1987 | 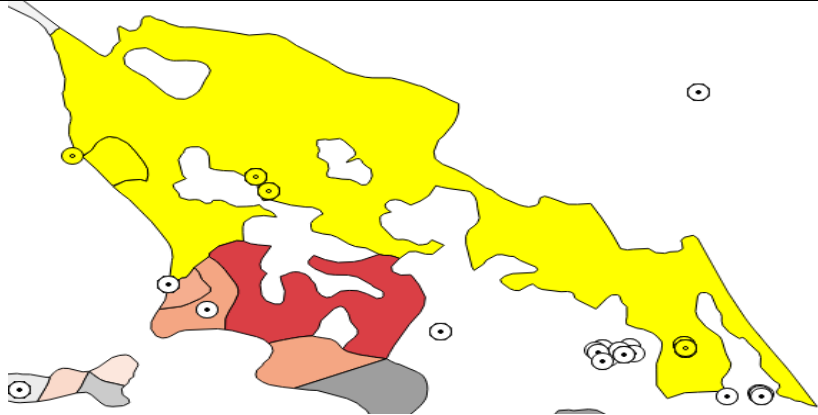  | Average of 15 Data<br>$\epsilon\text{Nd} = -10.5$ SD = 0.5<br>[Nd] = 148 SD = 30<br><br><table><tr><td><math>\varphi</math></td><td><math>\lambda</math></td></tr><tr><td>43,44</td><td>10,74</td></tr><tr><td>43,39</td><td>10,77</td></tr><tr><td>42,91</td><td>11,76</td></tr><tr><td>42,90</td><td>11,77</td></tr><tr><td>43,39</td><td>10,77</td></tr><tr><td>43,44</td><td>10,74</td></tr><tr><td>42,90</td><td>11,77</td></tr><tr><td>43,50</td><td>10,30</td></tr></table> | $\varphi$ | $\lambda$ | 43,44 | 10,74 | 43,39 | 10,77 | 42,91 | 11,76 | 42,90 | 11,77 | 43,39 | 10,77 | 43,44 | 10,74 | 42,90 | 11,77 | 43,50 | 10,30 |
| $\varphi$ | $\lambda$                                                                                                                                                                |                                                                                     |                                                                                                                                                                                                                                                                                                                                                                                                                                                                                    |           |           |       |       |       |       |       |       |       |       |       |       |       |       |       |       |       |       |
| 43,44     | 10,74                                                                                                                                                                    |                                                                                     |                                                                                                                                                                                                                                                                                                                                                                                                                                                                                    |           |           |       |       |       |       |       |       |       |       |       |       |       |       |       |       |       |       |
| 43,39     | 10,77                                                                                                                                                                    |                                                                                     |                                                                                                                                                                                                                                                                                                                                                                                                                                                                                    |           |           |       |       |       |       |       |       |       |       |       |       |       |       |       |       |       |       |
| 42,91     | 11,76                                                                                                                                                                    |                                                                                     |                                                                                                                                                                                                                                                                                                                                                                                                                                                                                    |           |           |       |       |       |       |       |       |       |       |       |       |       |       |       |       |       |       |
| 42,90     | 11,77                                                                                                                                                                    |                                                                                     |                                                                                                                                                                                                                                                                                                                                                                                                                                                                                    |           |           |       |       |       |       |       |       |       |       |       |       |       |       |       |       |       |       |
| 43,39     | 10,77                                                                                                                                                                    |                                                                                     |                                                                                                                                                                                                                                                                                                                                                                                                                                                                                    |           |           |       |       |       |       |       |       |       |       |       |       |       |       |       |       |       |       |
| 43,44     | 10,74                                                                                                                                                                    |                                                                                     |                                                                                                                                                                                                                                                                                                                                                                                                                                                                                    |           |           |       |       |       |       |       |       |       |       |       |       |       |       |       |       |       |       |
| 42,90     | 11,77                                                                                                                                                                    |                                                                                     |                                                                                                                                                                                                                                                                                                                                                                                                                                                                                    |           |           |       |       |       |       |       |       |       |       |       |       |       |       |       |       |       |       |
| 43,50     | 10,30                                                                                                                                                                    |                                                                                     |                                                                                                                                                                                                                                                                                                                                                                                                                                                                                    |           |           |       |       |       |       |       |       |       |       |       |       |       |       |       |       |       |       |
| 24        | Conticelli <i>et al.</i> , 2002<br>Conticelli <i>et al.</i> , 2009<br>Gagnevin <i>et al.</i> , 2004                                                                      |  | Average of 17 Data<br>$\epsilon\text{Nd} = -8.3$ SD = 1.2<br>[Nd] = 30 SD = 16.9<br><br><table><tr><td><math>\varphi</math></td><td><math>\lambda</math></td></tr><tr><td>10.17</td><td>2.65</td></tr><tr><td>9.84</td><td>7.15</td></tr><tr><td>9.80</td><td>7.55</td></tr><tr><td>9.81</td><td>4.63</td></tr><tr><td>10.17</td><td>7.4</td></tr><tr><td>10.17</td><td>5.8</td></tr><tr><td>9.81</td><td>4.63</td></tr></table>                                                   | $\varphi$ | $\lambda$ | 10.17 | 2.65  | 9.84  | 7.15  | 9.80  | 7.55  | 9.81  | 4.63  | 10.17 | 7.4   | 10.17 | 5.8   | 9.81  | 4.63  |       |       |
| $\varphi$ | $\lambda$                                                                                                                                                                |                                                                                     |                                                                                                                                                                                                                                                                                                                                                                                                                                                                                    |           |           |       |       |       |       |       |       |       |       |       |       |       |       |       |       |       |       |
| 10.17     | 2.65                                                                                                                                                                     |                                                                                     |                                                                                                                                                                                                                                                                                                                                                                                                                                                                                    |           |           |       |       |       |       |       |       |       |       |       |       |       |       |       |       |       |       |
| 9.84      | 7.15                                                                                                                                                                     |                                                                                     |                                                                                                                                                                                                                                                                                                                                                                                                                                                                                    |           |           |       |       |       |       |       |       |       |       |       |       |       |       |       |       |       |       |
| 9.80      | 7.55                                                                                                                                                                     |                                                                                     |                                                                                                                                                                                                                                                                                                                                                                                                                                                                                    |           |           |       |       |       |       |       |       |       |       |       |       |       |       |       |       |       |       |
| 9.81      | 4.63                                                                                                                                                                     |                                                                                     |                                                                                                                                                                                                                                                                                                                                                                                                                                                                                    |           |           |       |       |       |       |       |       |       |       |       |       |       |       |       |       |       |       |
| 10.17     | 7.4                                                                                                                                                                      |                                                                                     |                                                                                                                                                                                                                                                                                                                                                                                                                                                                                    |           |           |       |       |       |       |       |       |       |       |       |       |       |       |       |       |       |       |
| 10.17     | 5.8                                                                                                                                                                      |                                                                                     |                                                                                                                                                                                                                                                                                                                                                                                                                                                                                    |           |           |       |       |       |       |       |       |       |       |       |       |       |       |       |       |       |       |
| 9.81      | 4.63                                                                                                                                                                     |                                                                                     |                                                                                                                                                                                                                                                                                                                                                                                                                                                                                    |           |           |       |       |       |       |       |       |       |       |       |       |       |       |       |       |       |       |

|    |                                                                                                                                                                                                                                                                                 |                                                                                    |                                                                                                                                                                                                                                                                                                                                                                                                                       |
|----|---------------------------------------------------------------------------------------------------------------------------------------------------------------------------------------------------------------------------------------------------------------------------------|------------------------------------------------------------------------------------|-----------------------------------------------------------------------------------------------------------------------------------------------------------------------------------------------------------------------------------------------------------------------------------------------------------------------------------------------------------------------------------------------------------------------|
| 25 | Hawkesworth <i>et al.</i> 1979<br>Ferrara <i>et al.</i> , 1989                                                                                                                                                                                                                  |  | Average of 10 Data<br>$\epsilon\text{Nd} = -8.3$ $\text{SD} = 0.8$<br>$[\text{Nd}] = 31$ $\text{SD} = 8.2$<br><br>$\varphi$ $\lambda$<br>43.1                      10.53<br>43.02                    10.62                                                                                                                                                                                                            |
| 26 | Dibattistini <i>et al.</i> , 1998<br>Conticelli <i>et al.</i> , 2002<br>Avanzinelli <i>et al.</i> , 2008<br>Rogers <i>et al.</i> , 1985<br>Rogers <i>et al.</i> , 1985<br>Varekamp <i>et al.</i> , 1989<br>We don't represented data from :<br>Hawkesworth <i>et al.</i> , 1979 |  | Average of 40 Data<br>$\epsilon\text{Nd} = -10.3$ $\text{SD} = 0.6$<br>$[\text{Nd}] = 80$ $\text{SD} = 77$<br><br>$\varphi$ $\lambda$<br>42.95                    11.18<br>42.85                    11.56<br>42.86                    11.58<br>42.89                    11.55<br>42.56                    11.67<br>42.95                    11.18<br>42.64                    11.72<br>42.89                    11.56 |

| 27      | Conticelli <i>et al.</i> , 2009 | 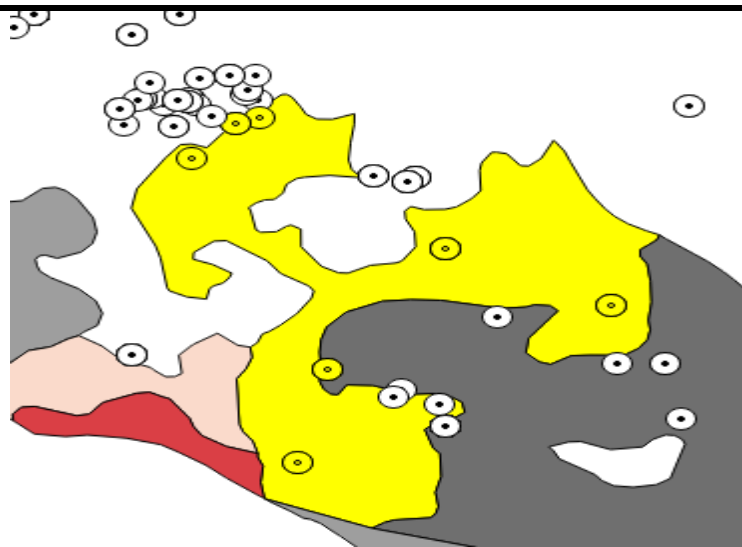  | <p>Average of 4 Data<br/><math>\epsilon\text{Nd} = -10.3</math>    <math>\text{SD} = 0.3</math><br/><math>[\text{Nd}] = 60</math>    <math>\text{SD} = 17</math></p> <table><tr><th><math>\phi</math></th><th><math>\lambda</math></th></tr><tr><td>42.4267</td><td>11.9903</td></tr><tr><td>42.4833</td><td>12.0608</td></tr><tr><td>42.4761</td><td>12.0369</td></tr><tr><td>42.3</td><td>12.25</td></tr><tr><td>42</td><td>12.1</td></tr><tr><td>42.13</td><td>12.13</td></tr><tr><td>42.22</td><td>12.42</td></tr></table> | $\phi$ | $\lambda$ | 42.4267 | 11.9903 | 42.4833 | 12.0608 | 42.4761 | 12.0369 | 42.3 | 12.25 | 42 | 12.1 | 42.13 | 12.13 | 42.22 | 12.42 |
|---------|---------------------------------|-------------------------------------------------------------------------------------|--------------------------------------------------------------------------------------------------------------------------------------------------------------------------------------------------------------------------------------------------------------------------------------------------------------------------------------------------------------------------------------------------------------------------------------------------------------------------------------------------------------------------------|--------|-----------|---------|---------|---------|---------|---------|---------|------|-------|----|------|-------|-------|-------|-------|
| $\phi$  | $\lambda$                       |                                                                                     |                                                                                                                                                                                                                                                                                                                                                                                                                                                                                                                                |        |           |         |         |         |         |         |         |      |       |    |      |       |       |       |       |
| 42.4267 | 11.9903                         |                                                                                     |                                                                                                                                                                                                                                                                                                                                                                                                                                                                                                                                |        |           |         |         |         |         |         |         |      |       |    |      |       |       |       |       |
| 42.4833 | 12.0608                         |                                                                                     |                                                                                                                                                                                                                                                                                                                                                                                                                                                                                                                                |        |           |         |         |         |         |         |         |      |       |    |      |       |       |       |       |
| 42.4761 | 12.0369                         |                                                                                     |                                                                                                                                                                                                                                                                                                                                                                                                                                                                                                                                |        |           |         |         |         |         |         |         |      |       |    |      |       |       |       |       |
| 42.3    | 12.25                           |                                                                                     |                                                                                                                                                                                                                                                                                                                                                                                                                                                                                                                                |        |           |         |         |         |         |         |         |      |       |    |      |       |       |       |       |
| 42      | 12.1                            |                                                                                     |                                                                                                                                                                                                                                                                                                                                                                                                                                                                                                                                |        |           |         |         |         |         |         |         |      |       |    |      |       |       |       |       |
| 42.13   | 12.13                           |                                                                                     |                                                                                                                                                                                                                                                                                                                                                                                                                                                                                                                                |        |           |         |         |         |         |         |         |      |       |    |      |       |       |       |       |
| 42.22   | 12.42                           |                                                                                     |                                                                                                                                                                                                                                                                                                                                                                                                                                                                                                                                |        |           |         |         |         |         |         |         |      |       |    |      |       |       |       |       |
| 28      | Conticelli <i>et al.</i> , 2002 |  | <p>Average of 2 Data<br/><math>\epsilon\text{Nd} = -11</math>    <math>\text{SD} = 0.2</math><br/><math>[\text{Nd}] = 69</math>    <math>\text{SD} = 15</math></p> <table><tr><th><math>\phi</math></th><th><math>\lambda</math></th></tr><tr><td>42.15</td><td>11.93</td></tr></table>                                                                                                                                                                                                                                        | $\phi$ | $\lambda$ | 42.15   | 11.93   |         |         |         |         |      |       |    |      |       |       |       |       |
| $\phi$  | $\lambda$                       |                                                                                     |                                                                                                                                                                                                                                                                                                                                                                                                                                                                                                                                |        |           |         |         |         |         |         |         |      |       |    |      |       |       |       |       |
| 42.15   | 11.93                           |                                                                                     |                                                                                                                                                                                                                                                                                                                                                                                                                                                                                                                                |        |           |         |         |         |         |         |         |      |       |    |      |       |       |       |       |

| 29        | <p>Marra <i>et al.</i>, 2011<br/>Federico <i>et al.</i>, 1994<br/>Peccerillo <i>et al.</i>, 2010<br/>Federico <i>et al.</i>, 1994<br/>Hawkesworth <i>et al.</i>, 1979<br/>Avanzinelli <i>et al.</i>, 2008<br/>Boari <i>et al.</i>, 2009<br/>Boari <i>et al.</i>, 2009</p> | 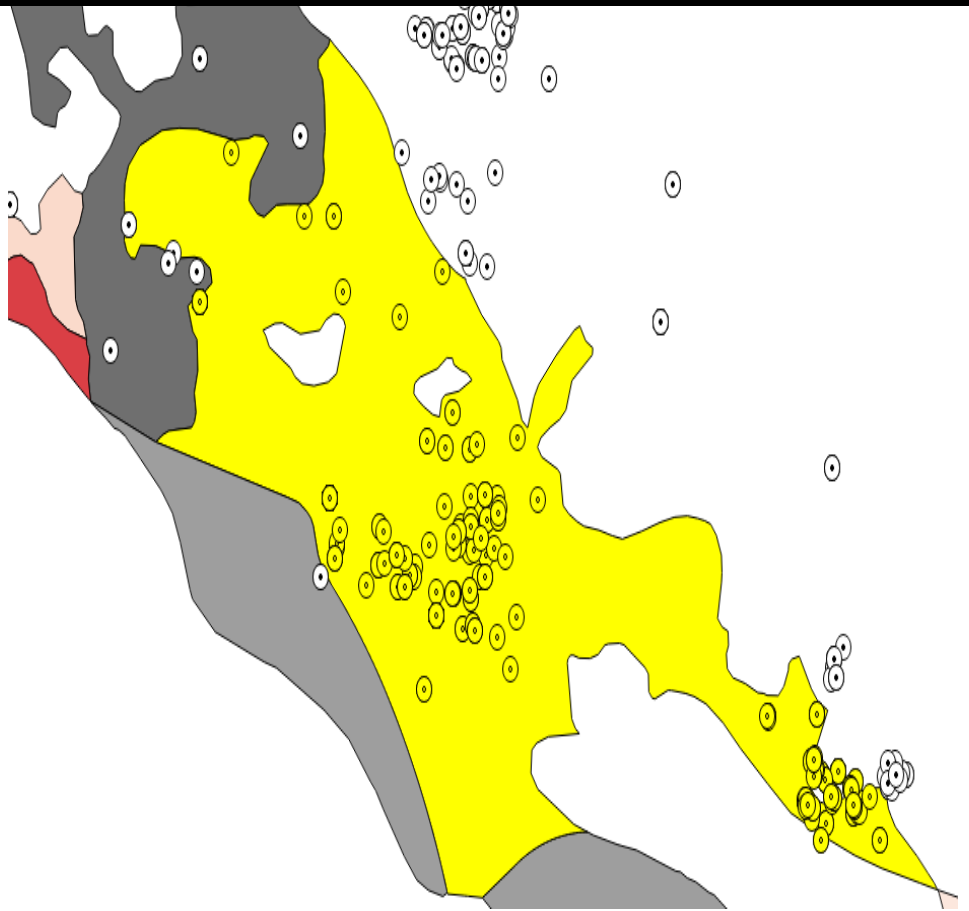 | <p>Average of 72 Data<br/><math>\epsilon\text{Nd} = -10.4</math> SD = 0.9<br/><math>[\text{Nd}] = 112</math> SD = 40</p> <table><thead><tr><th><math>\varphi</math></th><th><math>\lambda</math></th></tr></thead><tbody><tr><td>41,65</td><td>12,63</td></tr><tr><td>41,67</td><td>12,77</td></tr><tr><td>41,71</td><td>12,75</td></tr><tr><td>41,72</td><td>12,72</td></tr><tr><td>41,72</td><td>12,69</td></tr><tr><td>41,72</td><td>12,71</td></tr><tr><td>41,73</td><td>12,79</td></tr><tr><td>41,73</td><td>12,65</td></tr><tr><td>41,75</td><td>12,71</td></tr><tr><td>41,75</td><td>12,68</td></tr><tr><td>41,75</td><td>12,68</td></tr><tr><td>41,75</td><td>12,65</td></tr><tr><td>41,76</td><td>12,71</td></tr><tr><td>41,76</td><td>12,58</td></tr><tr><td>41,76</td><td>12,53</td></tr><tr><td>41,77</td><td>12,61</td></tr><tr><td>41,77</td><td>12,73</td></tr><tr><td>41,77</td><td>12,72</td></tr><tr><td>41,77</td><td>12,61</td></tr><tr><td>41,78</td><td>12,55</td></tr><tr><td>41,78</td><td>12,56</td></tr><tr><td>41,79</td><td>12,60</td></tr><tr><td>41,79</td><td>12,48</td></tr><tr><td>41,79</td><td>12,77</td></tr><tr><td>41,79</td><td>12,58</td></tr></tbody></table> | $\varphi$ | $\lambda$ | 41,65 | 12,63 | 41,67 | 12,77 | 41,71 | 12,75 | 41,72 | 12,72 | 41,72 | 12,69 | 41,72 | 12,71 | 41,73 | 12,79 | 41,73 | 12,65 | 41,75 | 12,71 | 41,75 | 12,68 | 41,75 | 12,68 | 41,75 | 12,65 | 41,76 | 12,71 | 41,76 | 12,58 | 41,76 | 12,53 | 41,77 | 12,61 | 41,77 | 12,73 | 41,77 | 12,72 | 41,77 | 12,61 | 41,78 | 12,55 | 41,78 | 12,56 | 41,79 | 12,60 | 41,79 | 12,48 | 41,79 | 12,77 | 41,79 | 12,58 |
|-----------|---------------------------------------------------------------------------------------------------------------------------------------------------------------------------------------------------------------------------------------------------------------------------|-------------------------------------------------------------------------------------|--------------------------------------------------------------------------------------------------------------------------------------------------------------------------------------------------------------------------------------------------------------------------------------------------------------------------------------------------------------------------------------------------------------------------------------------------------------------------------------------------------------------------------------------------------------------------------------------------------------------------------------------------------------------------------------------------------------------------------------------------------------------------------------------------------------------------------------------------------------------------------------------------------------------------------------------------------------------------------------------------------------------------------------------------------------------------------------------------------------------------------------------------------------------------------------------------------|-----------|-----------|-------|-------|-------|-------|-------|-------|-------|-------|-------|-------|-------|-------|-------|-------|-------|-------|-------|-------|-------|-------|-------|-------|-------|-------|-------|-------|-------|-------|-------|-------|-------|-------|-------|-------|-------|-------|-------|-------|-------|-------|-------|-------|-------|-------|-------|-------|-------|-------|-------|-------|
| $\varphi$ | $\lambda$                                                                                                                                                                                                                                                                 |                                                                                     |                                                                                                                                                                                                                                                                                                                                                                                                                                                                                                                                                                                                                                                                                                                                                                                                                                                                                                                                                                                                                                                                                                                                                                                                        |           |           |       |       |       |       |       |       |       |       |       |       |       |       |       |       |       |       |       |       |       |       |       |       |       |       |       |       |       |       |       |       |       |       |       |       |       |       |       |       |       |       |       |       |       |       |       |       |       |       |       |       |
| 41,65     | 12,63                                                                                                                                                                                                                                                                     |                                                                                     |                                                                                                                                                                                                                                                                                                                                                                                                                                                                                                                                                                                                                                                                                                                                                                                                                                                                                                                                                                                                                                                                                                                                                                                                        |           |           |       |       |       |       |       |       |       |       |       |       |       |       |       |       |       |       |       |       |       |       |       |       |       |       |       |       |       |       |       |       |       |       |       |       |       |       |       |       |       |       |       |       |       |       |       |       |       |       |       |       |
| 41,67     | 12,77                                                                                                                                                                                                                                                                     |                                                                                     |                                                                                                                                                                                                                                                                                                                                                                                                                                                                                                                                                                                                                                                                                                                                                                                                                                                                                                                                                                                                                                                                                                                                                                                                        |           |           |       |       |       |       |       |       |       |       |       |       |       |       |       |       |       |       |       |       |       |       |       |       |       |       |       |       |       |       |       |       |       |       |       |       |       |       |       |       |       |       |       |       |       |       |       |       |       |       |       |       |
| 41,71     | 12,75                                                                                                                                                                                                                                                                     |                                                                                     |                                                                                                                                                                                                                                                                                                                                                                                                                                                                                                                                                                                                                                                                                                                                                                                                                                                                                                                                                                                                                                                                                                                                                                                                        |           |           |       |       |       |       |       |       |       |       |       |       |       |       |       |       |       |       |       |       |       |       |       |       |       |       |       |       |       |       |       |       |       |       |       |       |       |       |       |       |       |       |       |       |       |       |       |       |       |       |       |       |
| 41,72     | 12,72                                                                                                                                                                                                                                                                     |                                                                                     |                                                                                                                                                                                                                                                                                                                                                                                                                                                                                                                                                                                                                                                                                                                                                                                                                                                                                                                                                                                                                                                                                                                                                                                                        |           |           |       |       |       |       |       |       |       |       |       |       |       |       |       |       |       |       |       |       |       |       |       |       |       |       |       |       |       |       |       |       |       |       |       |       |       |       |       |       |       |       |       |       |       |       |       |       |       |       |       |       |
| 41,72     | 12,69                                                                                                                                                                                                                                                                     |                                                                                     |                                                                                                                                                                                                                                                                                                                                                                                                                                                                                                                                                                                                                                                                                                                                                                                                                                                                                                                                                                                                                                                                                                                                                                                                        |           |           |       |       |       |       |       |       |       |       |       |       |       |       |       |       |       |       |       |       |       |       |       |       |       |       |       |       |       |       |       |       |       |       |       |       |       |       |       |       |       |       |       |       |       |       |       |       |       |       |       |       |
| 41,72     | 12,71                                                                                                                                                                                                                                                                     |                                                                                     |                                                                                                                                                                                                                                                                                                                                                                                                                                                                                                                                                                                                                                                                                                                                                                                                                                                                                                                                                                                                                                                                                                                                                                                                        |           |           |       |       |       |       |       |       |       |       |       |       |       |       |       |       |       |       |       |       |       |       |       |       |       |       |       |       |       |       |       |       |       |       |       |       |       |       |       |       |       |       |       |       |       |       |       |       |       |       |       |       |
| 41,73     | 12,79                                                                                                                                                                                                                                                                     |                                                                                     |                                                                                                                                                                                                                                                                                                                                                                                                                                                                                                                                                                                                                                                                                                                                                                                                                                                                                                                                                                                                                                                                                                                                                                                                        |           |           |       |       |       |       |       |       |       |       |       |       |       |       |       |       |       |       |       |       |       |       |       |       |       |       |       |       |       |       |       |       |       |       |       |       |       |       |       |       |       |       |       |       |       |       |       |       |       |       |       |       |
| 41,73     | 12,65                                                                                                                                                                                                                                                                     |                                                                                     |                                                                                                                                                                                                                                                                                                                                                                                                                                                                                                                                                                                                                                                                                                                                                                                                                                                                                                                                                                                                                                                                                                                                                                                                        |           |           |       |       |       |       |       |       |       |       |       |       |       |       |       |       |       |       |       |       |       |       |       |       |       |       |       |       |       |       |       |       |       |       |       |       |       |       |       |       |       |       |       |       |       |       |       |       |       |       |       |       |
| 41,75     | 12,71                                                                                                                                                                                                                                                                     |                                                                                     |                                                                                                                                                                                                                                                                                                                                                                                                                                                                                                                                                                                                                                                                                                                                                                                                                                                                                                                                                                                                                                                                                                                                                                                                        |           |           |       |       |       |       |       |       |       |       |       |       |       |       |       |       |       |       |       |       |       |       |       |       |       |       |       |       |       |       |       |       |       |       |       |       |       |       |       |       |       |       |       |       |       |       |       |       |       |       |       |       |
| 41,75     | 12,68                                                                                                                                                                                                                                                                     |                                                                                     |                                                                                                                                                                                                                                                                                                                                                                                                                                                                                                                                                                                                                                                                                                                                                                                                                                                                                                                                                                                                                                                                                                                                                                                                        |           |           |       |       |       |       |       |       |       |       |       |       |       |       |       |       |       |       |       |       |       |       |       |       |       |       |       |       |       |       |       |       |       |       |       |       |       |       |       |       |       |       |       |       |       |       |       |       |       |       |       |       |
| 41,75     | 12,68                                                                                                                                                                                                                                                                     |                                                                                     |                                                                                                                                                                                                                                                                                                                                                                                                                                                                                                                                                                                                                                                                                                                                                                                                                                                                                                                                                                                                                                                                                                                                                                                                        |           |           |       |       |       |       |       |       |       |       |       |       |       |       |       |       |       |       |       |       |       |       |       |       |       |       |       |       |       |       |       |       |       |       |       |       |       |       |       |       |       |       |       |       |       |       |       |       |       |       |       |       |
| 41,75     | 12,65                                                                                                                                                                                                                                                                     |                                                                                     |                                                                                                                                                                                                                                                                                                                                                                                                                                                                                                                                                                                                                                                                                                                                                                                                                                                                                                                                                                                                                                                                                                                                                                                                        |           |           |       |       |       |       |       |       |       |       |       |       |       |       |       |       |       |       |       |       |       |       |       |       |       |       |       |       |       |       |       |       |       |       |       |       |       |       |       |       |       |       |       |       |       |       |       |       |       |       |       |       |
| 41,76     | 12,71                                                                                                                                                                                                                                                                     |                                                                                     |                                                                                                                                                                                                                                                                                                                                                                                                                                                                                                                                                                                                                                                                                                                                                                                                                                                                                                                                                                                                                                                                                                                                                                                                        |           |           |       |       |       |       |       |       |       |       |       |       |       |       |       |       |       |       |       |       |       |       |       |       |       |       |       |       |       |       |       |       |       |       |       |       |       |       |       |       |       |       |       |       |       |       |       |       |       |       |       |       |
| 41,76     | 12,58                                                                                                                                                                                                                                                                     |                                                                                     |                                                                                                                                                                                                                                                                                                                                                                                                                                                                                                                                                                                                                                                                                                                                                                                                                                                                                                                                                                                                                                                                                                                                                                                                        |           |           |       |       |       |       |       |       |       |       |       |       |       |       |       |       |       |       |       |       |       |       |       |       |       |       |       |       |       |       |       |       |       |       |       |       |       |       |       |       |       |       |       |       |       |       |       |       |       |       |       |       |
| 41,76     | 12,53                                                                                                                                                                                                                                                                     |                                                                                     |                                                                                                                                                                                                                                                                                                                                                                                                                                                                                                                                                                                                                                                                                                                                                                                                                                                                                                                                                                                                                                                                                                                                                                                                        |           |           |       |       |       |       |       |       |       |       |       |       |       |       |       |       |       |       |       |       |       |       |       |       |       |       |       |       |       |       |       |       |       |       |       |       |       |       |       |       |       |       |       |       |       |       |       |       |       |       |       |       |
| 41,77     | 12,61                                                                                                                                                                                                                                                                     |                                                                                     |                                                                                                                                                                                                                                                                                                                                                                                                                                                                                                                                                                                                                                                                                                                                                                                                                                                                                                                                                                                                                                                                                                                                                                                                        |           |           |       |       |       |       |       |       |       |       |       |       |       |       |       |       |       |       |       |       |       |       |       |       |       |       |       |       |       |       |       |       |       |       |       |       |       |       |       |       |       |       |       |       |       |       |       |       |       |       |       |       |
| 41,77     | 12,73                                                                                                                                                                                                                                                                     |                                                                                     |                                                                                                                                                                                                                                                                                                                                                                                                                                                                                                                                                                                                                                                                                                                                                                                                                                                                                                                                                                                                                                                                                                                                                                                                        |           |           |       |       |       |       |       |       |       |       |       |       |       |       |       |       |       |       |       |       |       |       |       |       |       |       |       |       |       |       |       |       |       |       |       |       |       |       |       |       |       |       |       |       |       |       |       |       |       |       |       |       |
| 41,77     | 12,72                                                                                                                                                                                                                                                                     |                                                                                     |                                                                                                                                                                                                                                                                                                                                                                                                                                                                                                                                                                                                                                                                                                                                                                                                                                                                                                                                                                                                                                                                                                                                                                                                        |           |           |       |       |       |       |       |       |       |       |       |       |       |       |       |       |       |       |       |       |       |       |       |       |       |       |       |       |       |       |       |       |       |       |       |       |       |       |       |       |       |       |       |       |       |       |       |       |       |       |       |       |
| 41,77     | 12,61                                                                                                                                                                                                                                                                     |                                                                                     |                                                                                                                                                                                                                                                                                                                                                                                                                                                                                                                                                                                                                                                                                                                                                                                                                                                                                                                                                                                                                                                                                                                                                                                                        |           |           |       |       |       |       |       |       |       |       |       |       |       |       |       |       |       |       |       |       |       |       |       |       |       |       |       |       |       |       |       |       |       |       |       |       |       |       |       |       |       |       |       |       |       |       |       |       |       |       |       |       |
| 41,78     | 12,55                                                                                                                                                                                                                                                                     |                                                                                     |                                                                                                                                                                                                                                                                                                                                                                                                                                                                                                                                                                                                                                                                                                                                                                                                                                                                                                                                                                                                                                                                                                                                                                                                        |           |           |       |       |       |       |       |       |       |       |       |       |       |       |       |       |       |       |       |       |       |       |       |       |       |       |       |       |       |       |       |       |       |       |       |       |       |       |       |       |       |       |       |       |       |       |       |       |       |       |       |       |
| 41,78     | 12,56                                                                                                                                                                                                                                                                     |                                                                                     |                                                                                                                                                                                                                                                                                                                                                                                                                                                                                                                                                                                                                                                                                                                                                                                                                                                                                                                                                                                                                                                                                                                                                                                                        |           |           |       |       |       |       |       |       |       |       |       |       |       |       |       |       |       |       |       |       |       |       |       |       |       |       |       |       |       |       |       |       |       |       |       |       |       |       |       |       |       |       |       |       |       |       |       |       |       |       |       |       |
| 41,79     | 12,60                                                                                                                                                                                                                                                                     |                                                                                     |                                                                                                                                                                                                                                                                                                                                                                                                                                                                                                                                                                                                                                                                                                                                                                                                                                                                                                                                                                                                                                                                                                                                                                                                        |           |           |       |       |       |       |       |       |       |       |       |       |       |       |       |       |       |       |       |       |       |       |       |       |       |       |       |       |       |       |       |       |       |       |       |       |       |       |       |       |       |       |       |       |       |       |       |       |       |       |       |       |
| 41,79     | 12,48                                                                                                                                                                                                                                                                     |                                                                                     |                                                                                                                                                                                                                                                                                                                                                                                                                                                                                                                                                                                                                                                                                                                                                                                                                                                                                                                                                                                                                                                                                                                                                                                                        |           |           |       |       |       |       |       |       |       |       |       |       |       |       |       |       |       |       |       |       |       |       |       |       |       |       |       |       |       |       |       |       |       |       |       |       |       |       |       |       |       |       |       |       |       |       |       |       |       |       |       |       |
| 41,79     | 12,77                                                                                                                                                                                                                                                                     |                                                                                     |                                                                                                                                                                                                                                                                                                                                                                                                                                                                                                                                                                                                                                                                                                                                                                                                                                                                                                                                                                                                                                                                                                                                                                                                        |           |           |       |       |       |       |       |       |       |       |       |       |       |       |       |       |       |       |       |       |       |       |       |       |       |       |       |       |       |       |       |       |       |       |       |       |       |       |       |       |       |       |       |       |       |       |       |       |       |       |       |       |
| 41,79     | 12,58                                                                                                                                                                                                                                                                     |                                                                                     |                                                                                                                                                                                                                                                                                                                                                                                                                                                                                                                                                                                                                                                                                                                                                                                                                                                                                                                                                                                                                                                                                                                                                                                                        |           |           |       |       |       |       |       |       |       |       |       |       |       |       |       |       |       |       |       |       |       |       |       |       |       |       |       |       |       |       |       |       |       |       |       |       |       |       |       |       |       |       |       |       |       |       |       |       |       |       |       |       |

|    |                            |                                                                                     |                                                                                                                                                                                                                                                                                                                                                                                                                                                                                                                                                                                                                                                                                                                                                                                                                                                                                                                              |
|----|----------------------------|-------------------------------------------------------------------------------------|------------------------------------------------------------------------------------------------------------------------------------------------------------------------------------------------------------------------------------------------------------------------------------------------------------------------------------------------------------------------------------------------------------------------------------------------------------------------------------------------------------------------------------------------------------------------------------------------------------------------------------------------------------------------------------------------------------------------------------------------------------------------------------------------------------------------------------------------------------------------------------------------------------------------------|
|    |                            |                                                                                     | <div> <div>41,79</div> <div>12,73</div> </div> <div> <div>41,79</div> <div>12,71</div> </div> <div> <div>41,80</div> <div>12,71</div> </div> <div> <div>41,80</div> <div>12,48</div> </div> <div> <div>41,80</div> <div>12,69</div> </div> <div> <div>41,82</div> <div>12,69</div> </div> <div> <div>41,82</div> <div>12,56</div> </div> <div> <div>41,82</div> <div>12,49</div> </div> <div> <div>41,82</div> <div>12,71</div> </div> <div> <div>41,82</div> <div>12,69</div> </div> <div> <div>41,84</div> <div>12,66</div> </div> <div> <div>41,85</div> <div>12,82</div> </div> <div> <div>41,85</div> <div>12,47</div> </div> <div> <div>41,85</div> <div>12,47</div> </div> <div> <div>41,85</div> <div>12,75</div> </div> <div> <div>41,90</div> <div>12,71</div> </div> <div> <div>41,90</div> <div>12,67</div> </div> <div> <div>42,08</div> <div>12,66</div> </div> <div> <div>42,14</div> <div>12,48</div> </div> |
| 30 | Boari <i>et al.</i> , 2009 | 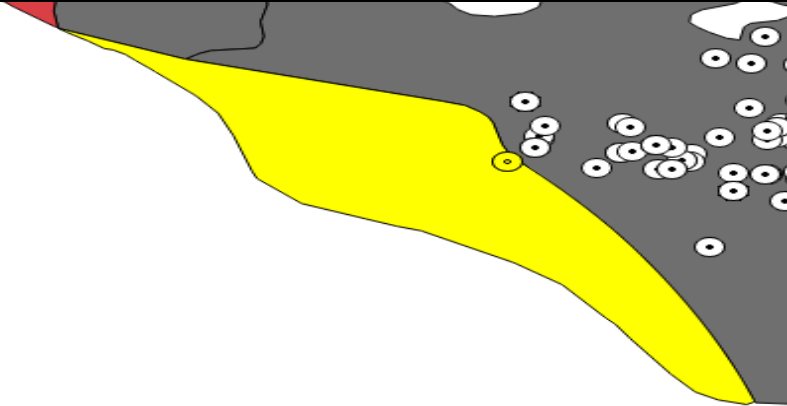 | <div>1 data</div> <div><math>\epsilon\text{Nd} = -10.3</math></div> <div><math>[\text{Nd}] = 144</math></div> <div> <div><math>\varphi</math></div> <div>41.76</div> </div> <div> <div><math>\lambda</math></div> <div>12.45</div> </div>                                                                                                                                                                                                                                                                                                                                                                                                                                                                                                                                                                                                                                                                                    |

|    |                                                                                                                                                                                                                                                                                                           |                                                                                     |                                                                                                                                                                                                                                                                                                                                                          |
|----|-----------------------------------------------------------------------------------------------------------------------------------------------------------------------------------------------------------------------------------------------------------------------------------------------------------|-------------------------------------------------------------------------------------|----------------------------------------------------------------------------------------------------------------------------------------------------------------------------------------------------------------------------------------------------------------------------------------------------------------------------------------------------------|
| 31 | <p>Conticelli <i>et al.</i>, 2002<br/>Boari <i>et al.</i>, 2009</p>                                                                                                                                                                                                                                       | 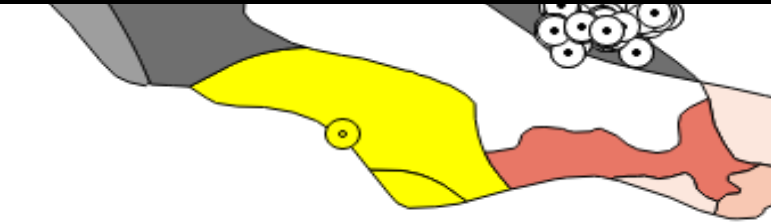  | <p>Average of 2 Data<br/> <math>\epsilon\text{Nd} = -7.6</math>    <math>\text{SD} = 1.4</math><br/> <math>[\text{Nd}] = 68</math>    <math>\text{SD} = 36</math></p> <p><math>\varphi</math>    <math>\lambda</math><br/> 41.35    12.95</p>                                                                                                            |
| 32 | <p>Values from sediment<br/> Direnzo <i>et al.</i>, 2011<br/> Dantonio <i>et al.</i>, 1999</p> <p>We don't represented data<br/> from :<br/> Pappalardo <i>et al.</i>, 2002</p>                                                                                                                           |   | <p>Average of 11 Data<br/> <math>\epsilon\text{Nd} = -5.3</math>    <math>\text{SD} = 1.8</math><br/> <math>[\text{Nd}] = 34</math>    <math>\text{SD} = 19</math></p> <p><math>\varphi</math>    <math>\lambda</math><br/> 40.7    13.6<br/> 40.8    13.43<br/> 40.84    13.59<br/> 40.87    13.67<br/> 40.715    13.48</p>                             |
| 33 | <p>Values from sediment<br/> Piochi <i>et al.</i>, 2006<br/> Direnzo <i>et al.</i>, 2011<br/> Somma <i>et al.</i>, 2001<br/> Ayuso <i>et al.</i>, 1998<br/> Caprarelli <i>et al.</i>, 1993</p> <p>We don't represented data<br/> from :<br/> Paone <i>et al.</i>, 2006<br/> Somma <i>et al.</i>, 1999</p> |  | <p>Average of 20 Data<br/> <math>\epsilon\text{Nd} = -3.3</math>    <math>\text{SD} = 1.6</math><br/> <math>[\text{Nd}] = 55</math>    <math>\text{SD} = 29</math></p> <p><math>\varphi</math>    <math>\lambda</math><br/> 40,7    14,2<br/> 40,7    14,3<br/> 40,7    14,3<br/> 40,7    13,9<br/> 40,7    14,4<br/> 40,8    14,5<br/> 40,8    14,0</p> |

|    |                             |                                                                                     |                                                                                                                                                                                                                                                          |
|----|-----------------------------|-------------------------------------------------------------------------------------|----------------------------------------------------------------------------------------------------------------------------------------------------------------------------------------------------------------------------------------------------------|
|    |                             |                                                                                     | 40,8      14,1<br>40,8      14,2<br>40,8      14,0<br>40,8      14,1<br>40,8      14,4<br>40,8      14,2<br>40,8      14,1<br>40,9      14,3<br>40,9      14,2<br>40,9      14,4<br>40,9      14,2<br>41,0      14,1<br>41,2      14,1<br>41,3      14,1 |
| 34 | Bianchini <i>et al</i> 2008 |  | 1 Data<br>$\epsilon\text{Nd} = +3.7$<br>$[\text{Nd}] = 73$ SD = 29.9<br><br>$\varphi$ $\lambda$<br>39.5                      16                                                                                                                          |

|    |                                                                                                                                                                                           |                                                                                     |                                                                                                                                                                                                                                                                                                                                                                   |
|----|-------------------------------------------------------------------------------------------------------------------------------------------------------------------------------------------|-------------------------------------------------------------------------------------|-------------------------------------------------------------------------------------------------------------------------------------------------------------------------------------------------------------------------------------------------------------------------------------------------------------------------------------------------------------------|
| 35 | Rottura <i>et al.</i> , 1991                                                                                                                                                              | 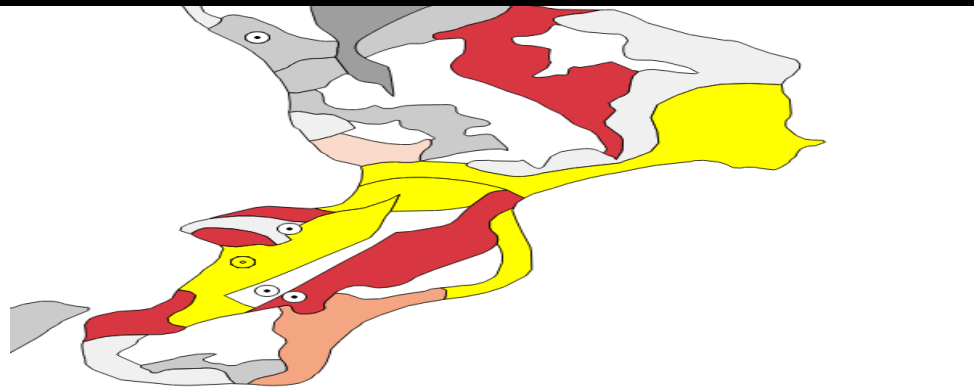  | 1 Data<br>$\epsilon\text{Nd} = -9.5$<br>$[\text{Nd}] = 30$<br><br>$\varphi$<br>38.48<br><br>$\lambda$<br>15.97                                                                                                                                                                                                                                                    |
| 36 | Values from sediment<br>Deastis <i>et al.</i> , 1997<br>Delmoro <i>et al.</i> , 1998<br>Esperanca <i>et al.</i> , 1992<br>Gioncada <i>et al.</i> , 2003<br>Tommasini <i>et al.</i> , 2007 |  | Average of 18 Data<br>$\epsilon\text{Nd} = -0.6$ SD = 1.2<br>$[\text{Nd}] = 38.7$ SD = 30<br><br>$\varphi$<br>38,28<br>38,38<br>38,40<br>38,50<br>38,53<br>38,58<br>38,63<br>38,70<br>38,79<br>38,79<br>38,80<br>38,80<br>38,81<br>$\lambda$<br>14,58<br>14,97<br>14,96<br>15,00<br>14,87<br>14,58<br>15,07<br>14,00<br>15,21<br>15,20<br>15,22<br>15,23<br>15,22 |

| 37        | Rotolo <i>et al.</i> , 2006                                                                                                                                                                      | 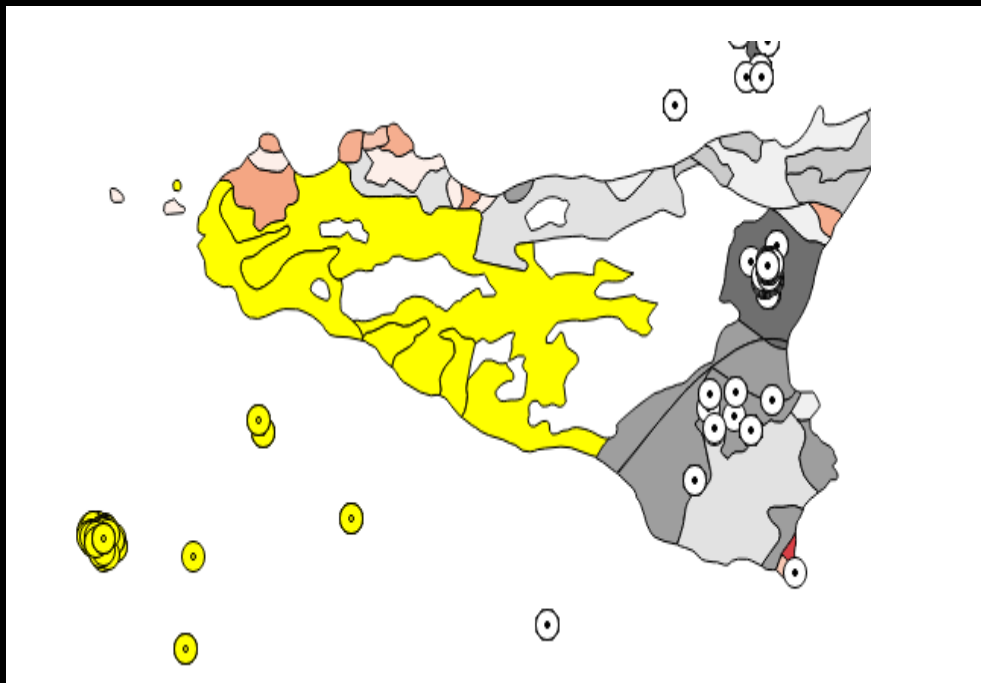  | <p>Average of 9 Data<br/><math>\epsilon\text{Nd} = +7.9</math>    <math>\text{SD} = 0.3</math><br/><math>[\text{Nd}] = 46.4</math>    <math>\text{SD} = 5.3</math></p> <table><thead><tr><th><math>\varphi</math></th><th><math>\lambda</math></th></tr></thead><tbody><tr><td>36,42</td><td>12,37</td></tr><tr><td>36,74</td><td>12,41</td></tr><tr><td>36,74</td><td>12,00</td></tr><tr><td>36,75</td><td>11,98</td></tr><tr><td>36,76</td><td>12,00</td></tr><tr><td>36,78</td><td>11,99</td></tr><tr><td>36,79</td><td>12,02</td></tr><tr><td>36,79</td><td>11,96</td></tr><tr><td>36,84</td><td>11,95</td></tr><tr><td>36,87</td><td>13,12</td></tr><tr><td>37,16</td><td>12,72</td></tr><tr><td>37,21</td><td>12,70</td></tr></tbody></table> | $\varphi$ | $\lambda$ | 36,42 | 12,37 | 36,74 | 12,41 | 36,74 | 12,00 | 36,75 | 11,98 | 36,76 | 12,00 | 36,78 | 11,99 | 36,79 | 12,02 | 36,79 | 11,96 | 36,84 | 11,95 | 36,87 | 13,12 | 37,16 | 12,72 | 37,21 | 12,70 |
|-----------|--------------------------------------------------------------------------------------------------------------------------------------------------------------------------------------------------|-------------------------------------------------------------------------------------|-----------------------------------------------------------------------------------------------------------------------------------------------------------------------------------------------------------------------------------------------------------------------------------------------------------------------------------------------------------------------------------------------------------------------------------------------------------------------------------------------------------------------------------------------------------------------------------------------------------------------------------------------------------------------------------------------------------------------------------------------------|-----------|-----------|-------|-------|-------|-------|-------|-------|-------|-------|-------|-------|-------|-------|-------|-------|-------|-------|-------|-------|-------|-------|-------|-------|-------|-------|
| $\varphi$ | $\lambda$                                                                                                                                                                                        |                                                                                     |                                                                                                                                                                                                                                                                                                                                                                                                                                                                                                                                                                                                                                                                                                                                                     |           |           |       |       |       |       |       |       |       |       |       |       |       |       |       |       |       |       |       |       |       |       |       |       |       |       |
| 36,42     | 12,37                                                                                                                                                                                            |                                                                                     |                                                                                                                                                                                                                                                                                                                                                                                                                                                                                                                                                                                                                                                                                                                                                     |           |           |       |       |       |       |       |       |       |       |       |       |       |       |       |       |       |       |       |       |       |       |       |       |       |       |
| 36,74     | 12,41                                                                                                                                                                                            |                                                                                     |                                                                                                                                                                                                                                                                                                                                                                                                                                                                                                                                                                                                                                                                                                                                                     |           |           |       |       |       |       |       |       |       |       |       |       |       |       |       |       |       |       |       |       |       |       |       |       |       |       |
| 36,74     | 12,00                                                                                                                                                                                            |                                                                                     |                                                                                                                                                                                                                                                                                                                                                                                                                                                                                                                                                                                                                                                                                                                                                     |           |           |       |       |       |       |       |       |       |       |       |       |       |       |       |       |       |       |       |       |       |       |       |       |       |       |
| 36,75     | 11,98                                                                                                                                                                                            |                                                                                     |                                                                                                                                                                                                                                                                                                                                                                                                                                                                                                                                                                                                                                                                                                                                                     |           |           |       |       |       |       |       |       |       |       |       |       |       |       |       |       |       |       |       |       |       |       |       |       |       |       |
| 36,76     | 12,00                                                                                                                                                                                            |                                                                                     |                                                                                                                                                                                                                                                                                                                                                                                                                                                                                                                                                                                                                                                                                                                                                     |           |           |       |       |       |       |       |       |       |       |       |       |       |       |       |       |       |       |       |       |       |       |       |       |       |       |
| 36,78     | 11,99                                                                                                                                                                                            |                                                                                     |                                                                                                                                                                                                                                                                                                                                                                                                                                                                                                                                                                                                                                                                                                                                                     |           |           |       |       |       |       |       |       |       |       |       |       |       |       |       |       |       |       |       |       |       |       |       |       |       |       |
| 36,79     | 12,02                                                                                                                                                                                            |                                                                                     |                                                                                                                                                                                                                                                                                                                                                                                                                                                                                                                                                                                                                                                                                                                                                     |           |           |       |       |       |       |       |       |       |       |       |       |       |       |       |       |       |       |       |       |       |       |       |       |       |       |
| 36,79     | 11,96                                                                                                                                                                                            |                                                                                     |                                                                                                                                                                                                                                                                                                                                                                                                                                                                                                                                                                                                                                                                                                                                                     |           |           |       |       |       |       |       |       |       |       |       |       |       |       |       |       |       |       |       |       |       |       |       |       |       |       |
| 36,84     | 11,95                                                                                                                                                                                            |                                                                                     |                                                                                                                                                                                                                                                                                                                                                                                                                                                                                                                                                                                                                                                                                                                                                     |           |           |       |       |       |       |       |       |       |       |       |       |       |       |       |       |       |       |       |       |       |       |       |       |       |       |
| 36,87     | 13,12                                                                                                                                                                                            |                                                                                     |                                                                                                                                                                                                                                                                                                                                                                                                                                                                                                                                                                                                                                                                                                                                                     |           |           |       |       |       |       |       |       |       |       |       |       |       |       |       |       |       |       |       |       |       |       |       |       |       |       |
| 37,16     | 12,72                                                                                                                                                                                            |                                                                                     |                                                                                                                                                                                                                                                                                                                                                                                                                                                                                                                                                                                                                                                                                                                                                     |           |           |       |       |       |       |       |       |       |       |       |       |       |       |       |       |       |       |       |       |       |       |       |       |       |       |
| 37,21     | 12,70                                                                                                                                                                                            |                                                                                     |                                                                                                                                                                                                                                                                                                                                                                                                                                                                                                                                                                                                                                                                                                                                                     |           |           |       |       |       |       |       |       |       |       |       |       |       |       |       |       |       |       |       |       |       |       |       |       |       |       |
| 38        | Tonarini <i>et al.</i> , 1996<br>Bianchini <i>et al.</i> , 1999<br>Sapienza <i>et al.</i> , 2009<br>Trua <i>et al.</i> , 1998<br>Beccaluva <i>et al.</i> , 1998<br>Tonarini <i>et al.</i> , 1996 |  | <p>Average of 15 Data<br/><math>\epsilon\text{Nd} = +7.2</math>    <math>\text{SD} = 1.8</math><br/><math>[\text{Nd}] = 40.4</math>    <math>\text{SD} = 30</math></p> <table><thead><tr><th><math>\varphi</math></th><th><math>\lambda</math></th></tr></thead><tbody><tr><td>37,00</td><td>14,67</td></tr><tr><td>37,25</td><td>14,73</td></tr><tr><td>37,22</td><td>14,85</td></tr><tr><td>37,30</td><td>14,85</td></tr><tr><td>37,17</td><td>14,92</td></tr><tr><td>37,74</td><td>14,92</td></tr><tr><td>37,64</td><td>15,00</td></tr></tbody></table>                                                                                                                                                                                          | $\varphi$ | $\lambda$ | 37,00 | 14,67 | 37,25 | 14,73 | 37,22 | 14,85 | 37,30 | 14,85 | 37,17 | 14,92 | 37,74 | 14,92 | 37,64 | 15,00 |       |       |       |       |       |       |       |       |       |       |
| $\varphi$ | $\lambda$                                                                                                                                                                                        |                                                                                     |                                                                                                                                                                                                                                                                                                                                                                                                                                                                                                                                                                                                                                                                                                                                                     |           |           |       |       |       |       |       |       |       |       |       |       |       |       |       |       |       |       |       |       |       |       |       |       |       |       |
| 37,00     | 14,67                                                                                                                                                                                            |                                                                                     |                                                                                                                                                                                                                                                                                                                                                                                                                                                                                                                                                                                                                                                                                                                                                     |           |           |       |       |       |       |       |       |       |       |       |       |       |       |       |       |       |       |       |       |       |       |       |       |       |       |
| 37,25     | 14,73                                                                                                                                                                                            |                                                                                     |                                                                                                                                                                                                                                                                                                                                                                                                                                                                                                                                                                                                                                                                                                                                                     |           |           |       |       |       |       |       |       |       |       |       |       |       |       |       |       |       |       |       |       |       |       |       |       |       |       |
| 37,22     | 14,85                                                                                                                                                                                            |                                                                                     |                                                                                                                                                                                                                                                                                                                                                                                                                                                                                                                                                                                                                                                                                                                                                     |           |           |       |       |       |       |       |       |       |       |       |       |       |       |       |       |       |       |       |       |       |       |       |       |       |       |
| 37,30     | 14,85                                                                                                                                                                                            |                                                                                     |                                                                                                                                                                                                                                                                                                                                                                                                                                                                                                                                                                                                                                                                                                                                                     |           |           |       |       |       |       |       |       |       |       |       |       |       |       |       |       |       |       |       |       |       |       |       |       |       |       |
| 37,17     | 14,92                                                                                                                                                                                            |                                                                                     |                                                                                                                                                                                                                                                                                                                                                                                                                                                                                                                                                                                                                                                                                                                                                     |           |           |       |       |       |       |       |       |       |       |       |       |       |       |       |       |       |       |       |       |       |       |       |       |       |       |
| 37,74     | 14,92                                                                                                                                                                                            |                                                                                     |                                                                                                                                                                                                                                                                                                                                                                                                                                                                                                                                                                                                                                                                                                                                                     |           |           |       |       |       |       |       |       |       |       |       |       |       |       |       |       |       |       |       |       |       |       |       |       |       |       |
| 37,64     | 15,00                                                                                                                                                                                            |                                                                                     |                                                                                                                                                                                                                                                                                                                                                                                                                                                                                                                                                                                                                                                                                                                                                     |           |           |       |       |       |       |       |       |       |       |       |       |       |       |       |       |       |       |       |       |       |       |       |       |       |       |

|                                                                                                                       |  |  |       |       |
|-----------------------------------------------------------------------------------------------------------------------|--|--|-------|-------|
|                                                                                                                       |  |  | 37,73 | 15,00 |
|                                                                                                                       |  |  | 37,73 | 15,00 |
|                                                                                                                       |  |  | 37,64 | 15,00 |
|                                                                                                                       |  |  | 37,74 | 15,01 |
|                                                                                                                       |  |  | 37,72 | 15,01 |
|                                                                                                                       |  |  | 36,68 | 15,12 |
| <div data-bbox="940 438 1232 1077"> </div> <div data-bbox="190 1077 616 1133"> <p><b>Corsica- Sardinia</b></p> </div> |  |  |       |       |

| 39        | <p>Lustrino <i>et al.</i>, 2000<br/>Downes <i>et al.</i>, 2001<br/>Montanini <i>et al.</i>, 1994</p> <p>We don't represented data<br/>from :<br/>Lustrino <i>et al.</i>, 2000</p> | 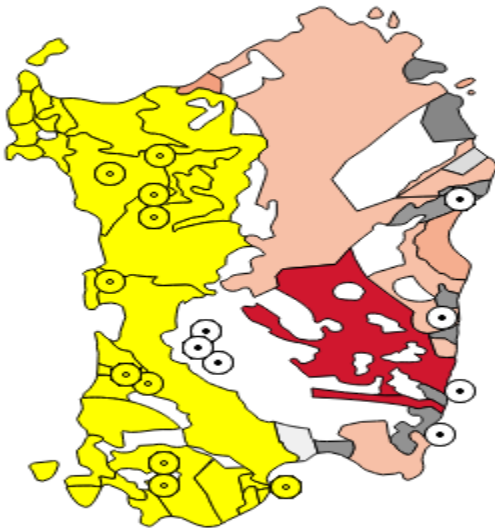  | <p>Average of 26 Data<br/><math>\epsilon\text{Nd} = -5.8</math>    <math>\text{SD} = 2.3</math><br/><math>[\text{Nd}] = 20.1</math>    <math>\text{SD} = 11.6</math></p> <table><tr><th><math>\varphi</math></th><th><math>\lambda</math></th></tr><tr><td>39.78</td><td>8.83</td></tr><tr><td>40</td><td>8.5</td></tr><tr><td>40.5</td><td>8.5</td></tr><tr><td>40.5</td><td>8.5</td></tr><tr><td>39.54</td><td>8.63</td></tr><tr><td>39.58</td><td>8.55</td></tr><tr><td>39.7</td><td>8.8</td></tr></table> | $\varphi$ | $\lambda$ | 39.78 | 8.83 | 40    | 8.5 | 40.5  | 8.5 | 40.5 | 8.5 | 39.54 | 8.63 | 39.58 | 8.55 | 39.7 | 8.8 |
|-----------|-----------------------------------------------------------------------------------------------------------------------------------------------------------------------------------|-------------------------------------------------------------------------------------|---------------------------------------------------------------------------------------------------------------------------------------------------------------------------------------------------------------------------------------------------------------------------------------------------------------------------------------------------------------------------------------------------------------------------------------------------------------------------------------------------------------|-----------|-----------|-------|------|-------|-----|-------|-----|------|-----|-------|------|-------|------|------|-----|
| $\varphi$ | $\lambda$                                                                                                                                                                         |                                                                                     |                                                                                                                                                                                                                                                                                                                                                                                                                                                                                                               |           |           |       |      |       |     |       |     |      |     |       |      |       |      |      |     |
| 39.78     | 8.83                                                                                                                                                                              |                                                                                     |                                                                                                                                                                                                                                                                                                                                                                                                                                                                                                               |           |           |       |      |       |     |       |     |      |     |       |      |       |      |      |     |
| 40        | 8.5                                                                                                                                                                               |                                                                                     |                                                                                                                                                                                                                                                                                                                                                                                                                                                                                                               |           |           |       |      |       |     |       |     |      |     |       |      |       |      |      |     |
| 40.5      | 8.5                                                                                                                                                                               |                                                                                     |                                                                                                                                                                                                                                                                                                                                                                                                                                                                                                               |           |           |       |      |       |     |       |     |      |     |       |      |       |      |      |     |
| 40.5      | 8.5                                                                                                                                                                               |                                                                                     |                                                                                                                                                                                                                                                                                                                                                                                                                                                                                                               |           |           |       |      |       |     |       |     |      |     |       |      |       |      |      |     |
| 39.54     | 8.63                                                                                                                                                                              |                                                                                     |                                                                                                                                                                                                                                                                                                                                                                                                                                                                                                               |           |           |       |      |       |     |       |     |      |     |       |      |       |      |      |     |
| 39.58     | 8.55                                                                                                                                                                              |                                                                                     |                                                                                                                                                                                                                                                                                                                                                                                                                                                                                                               |           |           |       |      |       |     |       |     |      |     |       |      |       |      |      |     |
| 39.7      | 8.8                                                                                                                                                                               |                                                                                     |                                                                                                                                                                                                                                                                                                                                                                                                                                                                                                               |           |           |       |      |       |     |       |     |      |     |       |      |       |      |      |     |
| 40        | <p>Lustrino <i>et al.</i>, 2002</p>                                                                                                                                               |  | <p>Average of 13 Data<br/><math>\epsilon\text{Nd} = -2.2</math>    <math>\text{SD} = 0.8</math><br/><math>[\text{Nd}] = 25.2</math>    <math>\text{SD} = 8.9</math></p> <table><tr><th><math>\varphi</math></th><th><math>\lambda</math></th></tr><tr><td>39,84</td><td>9,64</td></tr><tr><td>40,38</td><td>9,7</td></tr><tr><td>40,38</td><td>9,7</td></tr></table>                                                                                                                                          | $\varphi$ | $\lambda$ | 39,84 | 9,64 | 40,38 | 9,7 | 40,38 | 9,7 |      |     |       |      |       |      |      |     |
| $\varphi$ | $\lambda$                                                                                                                                                                         |                                                                                     |                                                                                                                                                                                                                                                                                                                                                                                                                                                                                                               |           |           |       |      |       |     |       |     |      |     |       |      |       |      |      |     |
| 39,84     | 9,64                                                                                                                                                                              |                                                                                     |                                                                                                                                                                                                                                                                                                                                                                                                                                                                                                               |           |           |       |      |       |     |       |     |      |     |       |      |       |      |      |     |
| 40,38     | 9,7                                                                                                                                                                               |                                                                                     |                                                                                                                                                                                                                                                                                                                                                                                                                                                                                                               |           |           |       |      |       |     |       |     |      |     |       |      |       |      |      |     |
| 40,38     | 9,7                                                                                                                                                                               |                                                                                     |                                                                                                                                                                                                                                                                                                                                                                                                                                                                                                               |           |           |       |      |       |     |       |     |      |     |       |      |       |      |      |     |

|    |                               |                                                                                     |                                                                                                                           |
|----|-------------------------------|-------------------------------------------------------------------------------------|---------------------------------------------------------------------------------------------------------------------------|
| 41 | Lustrino <i>et al.</i> , 2000 | 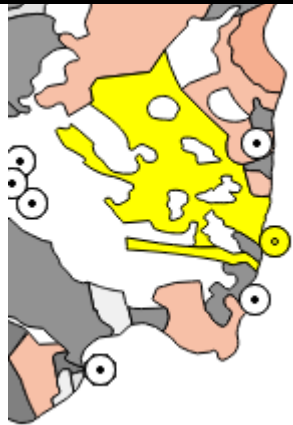  | 1 data<br>$\epsilon\text{Nd} = +4.4$<br>$[\text{Nd}] = 46.6$<br><br>$\varphi$ $\lambda$<br>39.5                      9.7  |
| 42 | Lustrino <i>et al.</i> , 2000 |  | 1 data<br>$\epsilon\text{Nd} = +4.4$<br>$[\text{Nd}] = 46.6$<br><br>$\varphi$ $\lambda$<br>39.3                      9.63 |

|           |                                                                                              |                                                                                     |                                                                                                                                                                                                                                                                                                                                                  |           |           |       |      |       |      |       |      |       |      |
|-----------|----------------------------------------------------------------------------------------------|-------------------------------------------------------------------------------------|--------------------------------------------------------------------------------------------------------------------------------------------------------------------------------------------------------------------------------------------------------------------------------------------------------------------------------------------------|-----------|-----------|-------|------|-------|------|-------|------|-------|------|
| 43        |                                                                                              | 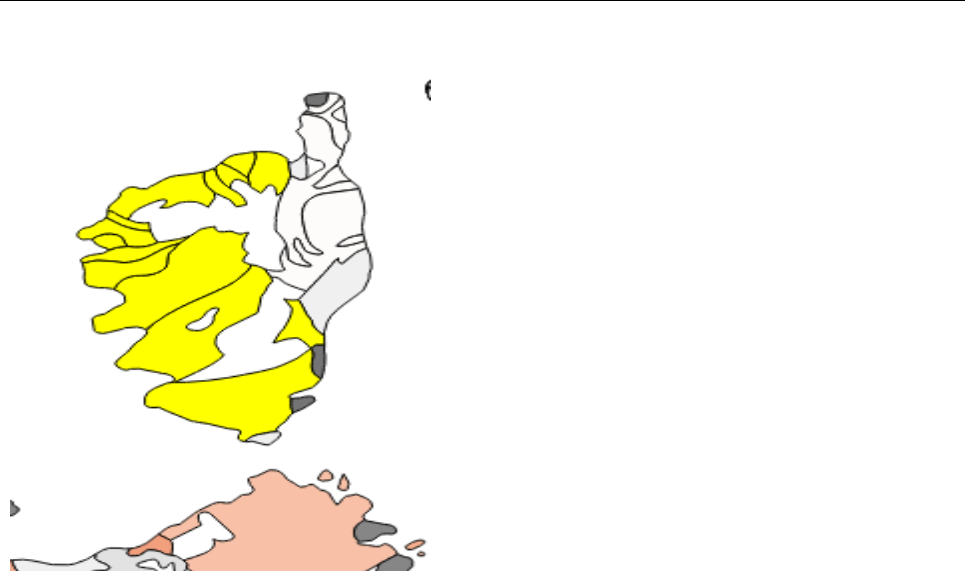  | Same values as in 40<br>$\epsilon\text{Nd} = -7.4$<br>$[\text{Nd}] = 51$                                                                                                                                                                                                                                                                         |           |           |       |      |       |      |       |      |       |      |
| 44        | Values from sediment :<br>Conticelli <i>et al.</i> , 2009<br>Conticelli <i>et al.</i> , 2002 |  | Average of 8 Data<br>$\epsilon\text{Nd} = -6.9$ $\text{SD} = 0.8$<br>$[\text{Nd}] = 60.1$ $\text{SD} = 30$<br><table><tr><td><math>\varphi</math></td><td><math>\lambda</math></td></tr><tr><td>43,03</td><td>9,81</td></tr><tr><td>43,01</td><td>9,81</td></tr><tr><td>43,05</td><td>9,84</td></tr><tr><td>43,04</td><td>9,81</td></tr></table> | $\varphi$ | $\lambda$ | 43,03 | 9,81 | 43,01 | 9,81 | 43,05 | 9,84 | 43,04 | 9,81 |
| $\varphi$ | $\lambda$                                                                                    |                                                                                     |                                                                                                                                                                                                                                                                                                                                                  |           |           |       |      |       |      |       |      |       |      |
| 43,03     | 9,81                                                                                         |                                                                                     |                                                                                                                                                                                                                                                                                                                                                  |           |           |       |      |       |      |       |      |       |      |
| 43,01     | 9,81                                                                                         |                                                                                     |                                                                                                                                                                                                                                                                                                                                                  |           |           |       |      |       |      |       |      |       |      |
| 43,05     | 9,84                                                                                         |                                                                                     |                                                                                                                                                                                                                                                                                                                                                  |           |           |       |      |       |      |       |      |       |      |
| 43,04     | 9,81                                                                                         |                                                                                     |                                                                                                                                                                                                                                                                                                                                                  |           |           |       |      |       |      |       |      |       |      |

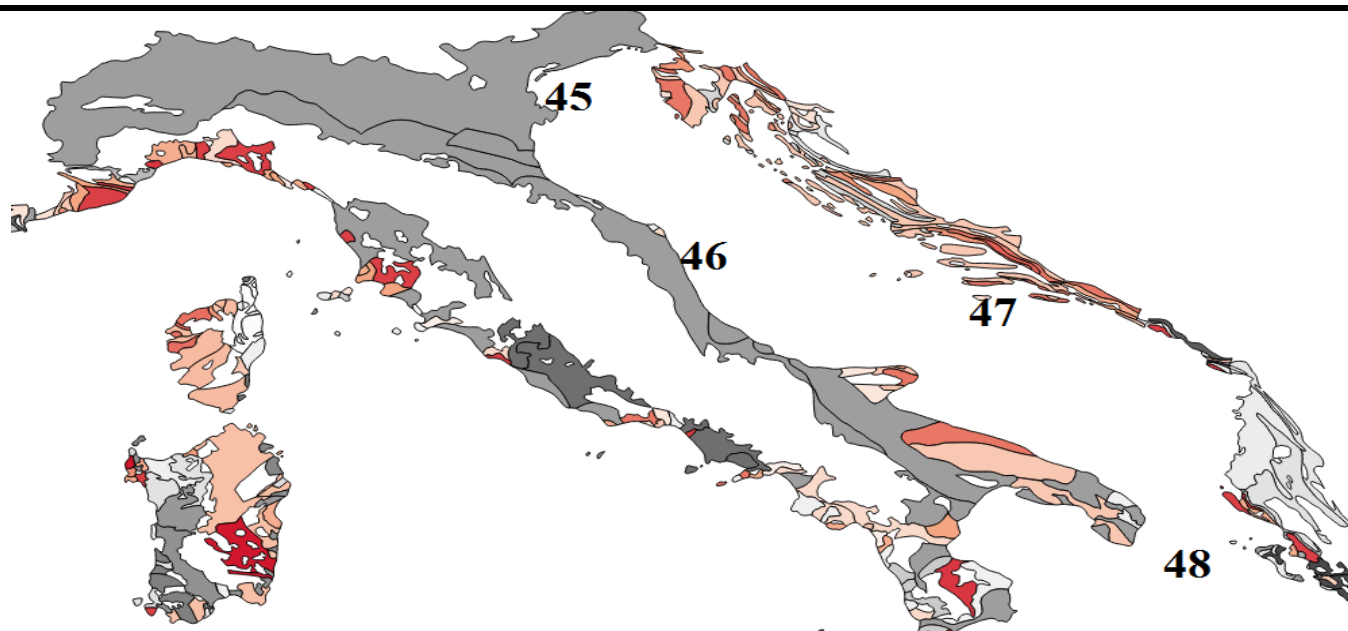

## The Adriatic sub-basin

|    |                                  |  |                                      |           |
|----|----------------------------------|--|--------------------------------------|-----------|
| 45 | Conticelli <i>et al.</i> , 2009  |  | Average of 19 Data                   |           |
|    | Prelevic <i>et al.</i> , 2008    |  | $\epsilon\text{Nd} = -10.4$ SD = 1.6 |           |
|    | Owen <i>et al.</i> , 2008        |  | [Nd] = 90.5 SD = 35.3                |           |
|    | Prelevic <i>et al.</i> , 2008    |  |                                      |           |
|    | We don't represented data from : |  | $\varphi$                            | $\lambda$ |
|    | Beccaluva <i>et al.</i> , 2007   |  | 7.7                                  | 34.05     |
|    | Gasperini <i>et al.</i> , 2006   |  | 7.82                                 | 34.05     |
|    |                                  |  | 7.33                                 | 34.05     |
|    |                                  |  | 7.33                                 | 28.45     |

|        |                                                                                                    | 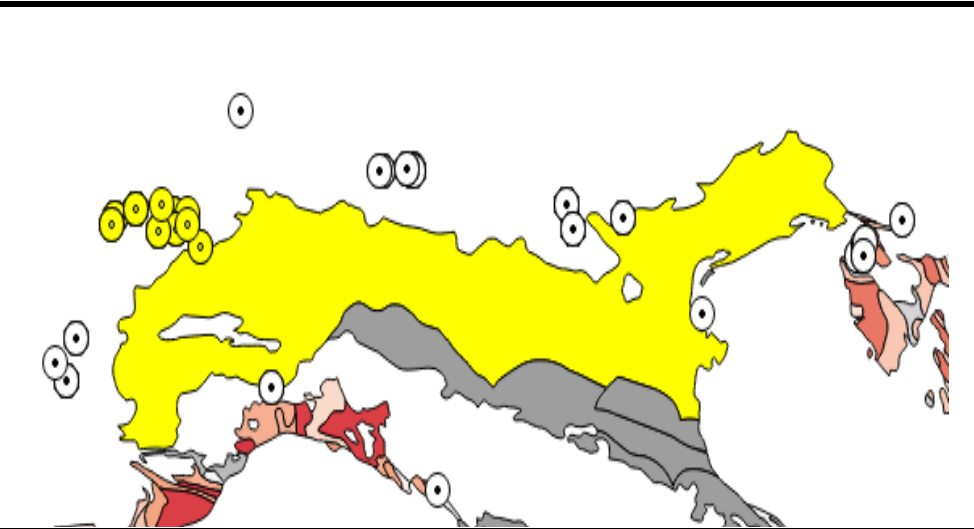  | <table><tr><td>7.95</td><td>28.45</td></tr><tr><td>7.85</td><td>28.45</td></tr><tr><td>7.33</td><td>28.45</td></tr><tr><td>7.7</td><td>31</td></tr><tr><td>7.33</td><td>31</td></tr><tr><td>8.05</td><td>31</td></tr><tr><td>7.95</td><td>28.45</td></tr><tr><td>7.85</td><td>28.45</td></tr><tr><td>7.73</td><td>28.45</td></tr></table>                                                                                                                                                                                                                                    | 7.95   | 28.45     | 7.85  | 28.45 | 7.33  | 28.45 | 7.7   | 31    | 7.33  | 31    | 8.05  | 31    | 7.95  | 28.45 | 7.85  | 28.45 | 7.73  | 28.45 |       |       |
|--------|----------------------------------------------------------------------------------------------------|-------------------------------------------------------------------------------------|------------------------------------------------------------------------------------------------------------------------------------------------------------------------------------------------------------------------------------------------------------------------------------------------------------------------------------------------------------------------------------------------------------------------------------------------------------------------------------------------------------------------------------------------------------------------------|--------|-----------|-------|-------|-------|-------|-------|-------|-------|-------|-------|-------|-------|-------|-------|-------|-------|-------|-------|-------|
| 7.95   | 28.45                                                                                              |                                                                                     |                                                                                                                                                                                                                                                                                                                                                                                                                                                                                                                                                                              |        |           |       |       |       |       |       |       |       |       |       |       |       |       |       |       |       |       |       |       |
| 7.85   | 28.45                                                                                              |                                                                                     |                                                                                                                                                                                                                                                                                                                                                                                                                                                                                                                                                                              |        |           |       |       |       |       |       |       |       |       |       |       |       |       |       |       |       |       |       |       |
| 7.33   | 28.45                                                                                              |                                                                                     |                                                                                                                                                                                                                                                                                                                                                                                                                                                                                                                                                                              |        |           |       |       |       |       |       |       |       |       |       |       |       |       |       |       |       |       |       |       |
| 7.7    | 31                                                                                                 |                                                                                     |                                                                                                                                                                                                                                                                                                                                                                                                                                                                                                                                                                              |        |           |       |       |       |       |       |       |       |       |       |       |       |       |       |       |       |       |       |       |
| 7.33   | 31                                                                                                 |                                                                                     |                                                                                                                                                                                                                                                                                                                                                                                                                                                                                                                                                                              |        |           |       |       |       |       |       |       |       |       |       |       |       |       |       |       |       |       |       |       |
| 8.05   | 31                                                                                                 |                                                                                     |                                                                                                                                                                                                                                                                                                                                                                                                                                                                                                                                                                              |        |           |       |       |       |       |       |       |       |       |       |       |       |       |       |       |       |       |       |       |
| 7.95   | 28.45                                                                                              |                                                                                     |                                                                                                                                                                                                                                                                                                                                                                                                                                                                                                                                                                              |        |           |       |       |       |       |       |       |       |       |       |       |       |       |       |       |       |       |       |       |
| 7.85   | 28.45                                                                                              |                                                                                     |                                                                                                                                                                                                                                                                                                                                                                                                                                                                                                                                                                              |        |           |       |       |       |       |       |       |       |       |       |       |       |       |       |       |       |       |       |       |
| 7.73   | 28.45                                                                                              |                                                                                     |                                                                                                                                                                                                                                                                                                                                                                                                                                                                                                                                                                              |        |           |       |       |       |       |       |       |       |       |       |       |       |       |       |       |       |       |       |       |
| 46     | Stoppa <i>et al.</i> , 2003<br>Dibattistini <i>et al.</i> , 2001<br>Castorina <i>et al.</i> , 2000 |  | <p>Average of 22 Data<br/><math>\epsilon Nd = -11.1</math>      <math>SD = 0.4</math><br/><math>[Nd] = 123</math>      <math>SD = 83</math></p> <table><tr><th><math>\phi</math></th><th><math>\lambda</math></th></tr><tr><td>42.95</td><td>13.63</td></tr><tr><td>40.95</td><td>15.62</td></tr><tr><td>42.95</td><td>13.63</td></tr><tr><td>42.95</td><td>13.63</td></tr><tr><td>40.95</td><td>15.62</td></tr><tr><td>40.95</td><td>15.62</td></tr><tr><td>42.95</td><td>13.63</td></tr><tr><td>40.96</td><td>15.61</td></tr><tr><td>40.93</td><td>15.64</td></tr></table> | $\phi$ | $\lambda$ | 42.95 | 13.63 | 40.95 | 15.62 | 42.95 | 13.63 | 42.95 | 13.63 | 40.95 | 15.62 | 40.95 | 15.62 | 42.95 | 13.63 | 40.96 | 15.61 | 40.93 | 15.64 |
| $\phi$ | $\lambda$                                                                                          |                                                                                     |                                                                                                                                                                                                                                                                                                                                                                                                                                                                                                                                                                              |        |           |       |       |       |       |       |       |       |       |       |       |       |       |       |       |       |       |       |       |
| 42.95  | 13.63                                                                                              |                                                                                     |                                                                                                                                                                                                                                                                                                                                                                                                                                                                                                                                                                              |        |           |       |       |       |       |       |       |       |       |       |       |       |       |       |       |       |       |       |       |
| 40.95  | 15.62                                                                                              |                                                                                     |                                                                                                                                                                                                                                                                                                                                                                                                                                                                                                                                                                              |        |           |       |       |       |       |       |       |       |       |       |       |       |       |       |       |       |       |       |       |
| 42.95  | 13.63                                                                                              |                                                                                     |                                                                                                                                                                                                                                                                                                                                                                                                                                                                                                                                                                              |        |           |       |       |       |       |       |       |       |       |       |       |       |       |       |       |       |       |       |       |
| 42.95  | 13.63                                                                                              |                                                                                     |                                                                                                                                                                                                                                                                                                                                                                                                                                                                                                                                                                              |        |           |       |       |       |       |       |       |       |       |       |       |       |       |       |       |       |       |       |       |
| 40.95  | 15.62                                                                                              |                                                                                     |                                                                                                                                                                                                                                                                                                                                                                                                                                                                                                                                                                              |        |           |       |       |       |       |       |       |       |       |       |       |       |       |       |       |       |       |       |       |
| 40.95  | 15.62                                                                                              |                                                                                     |                                                                                                                                                                                                                                                                                                                                                                                                                                                                                                                                                                              |        |           |       |       |       |       |       |       |       |       |       |       |       |       |       |       |       |       |       |       |
| 42.95  | 13.63                                                                                              |                                                                                     |                                                                                                                                                                                                                                                                                                                                                                                                                                                                                                                                                                              |        |           |       |       |       |       |       |       |       |       |       |       |       |       |       |       |       |       |       |       |
| 40.96  | 15.61                                                                                              |                                                                                     |                                                                                                                                                                                                                                                                                                                                                                                                                                                                                                                                                                              |        |           |       |       |       |       |       |       |       |       |       |       |       |       |       |       |       |       |       |       |
| 40.93  | 15.64                                                                                              |                                                                                     |                                                                                                                                                                                                                                                                                                                                                                                                                                                                                                                                                                              |        |           |       |       |       |       |       |       |       |       |       |       |       |       |       |       |       |       |       |       |

| 47        | Values from sediment<br>Prelevic <i>et al.</i> , 2008 | 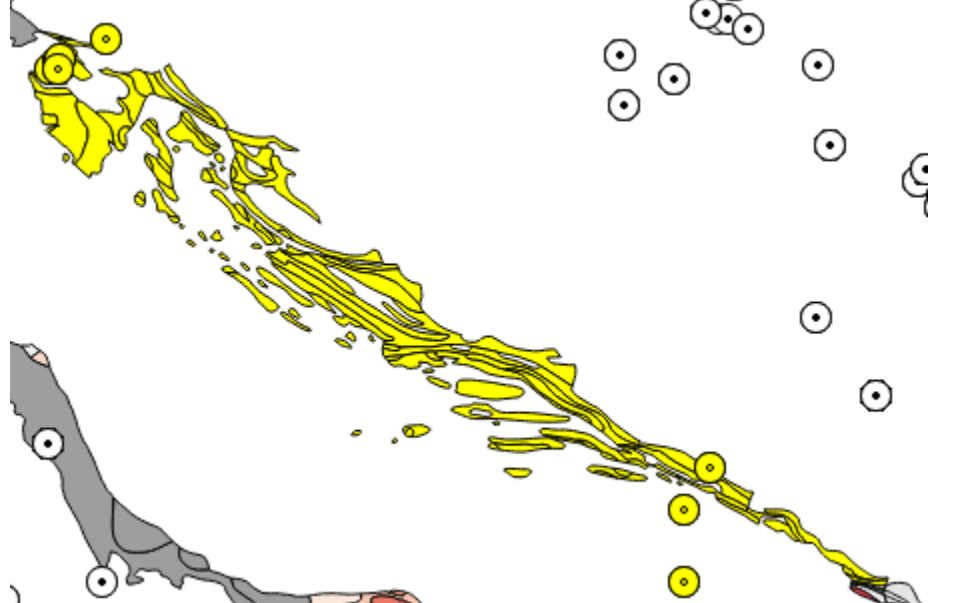  | Average of 4 Data<br>$\epsilon\text{Nd} = -9.1$ $\text{SD} = 0.9$<br>$[\text{Nd}] = 91.7$ $\text{SD} = 26.3$<br><br><table><tr><th><math>\varphi</math></th><th><math>\lambda</math></th></tr><tr><td>42.79</td><td>18.17</td></tr><tr><td>42.5</td><td>18</td></tr><tr><td>45.52</td><td>13.69</td></tr><tr><td>45.59</td><td>13.71</td></tr><tr><td>45.52</td><td>13.69</td></tr><tr><td>45.73</td><td>14.02</td></tr><tr><td>45.59</td><td>13.71</td></tr></table> | $\varphi$ | $\lambda$ | 42.79 | 18.17 | 42.5 | 18 | 45.52 | 13.69 | 45.59 | 13.71 | 45.52 | 13.69 | 45.73 | 14.02 | 45.59 | 13.71 |
|-----------|-------------------------------------------------------|-------------------------------------------------------------------------------------|-----------------------------------------------------------------------------------------------------------------------------------------------------------------------------------------------------------------------------------------------------------------------------------------------------------------------------------------------------------------------------------------------------------------------------------------------------------------------|-----------|-----------|-------|-------|------|----|-------|-------|-------|-------|-------|-------|-------|-------|-------|-------|
| $\varphi$ | $\lambda$                                             |                                                                                     |                                                                                                                                                                                                                                                                                                                                                                                                                                                                       |           |           |       |       |      |    |       |       |       |       |       |       |       |       |       |       |
| 42.79     | 18.17                                                 |                                                                                     |                                                                                                                                                                                                                                                                                                                                                                                                                                                                       |           |           |       |       |      |    |       |       |       |       |       |       |       |       |       |       |
| 42.5      | 18                                                    |                                                                                     |                                                                                                                                                                                                                                                                                                                                                                                                                                                                       |           |           |       |       |      |    |       |       |       |       |       |       |       |       |       |       |
| 45.52     | 13.69                                                 |                                                                                     |                                                                                                                                                                                                                                                                                                                                                                                                                                                                       |           |           |       |       |      |    |       |       |       |       |       |       |       |       |       |       |
| 45.59     | 13.71                                                 |                                                                                     |                                                                                                                                                                                                                                                                                                                                                                                                                                                                       |           |           |       |       |      |    |       |       |       |       |       |       |       |       |       |       |
| 45.52     | 13.69                                                 |                                                                                     |                                                                                                                                                                                                                                                                                                                                                                                                                                                                       |           |           |       |       |      |    |       |       |       |       |       |       |       |       |       |       |
| 45.73     | 14.02                                                 |                                                                                     |                                                                                                                                                                                                                                                                                                                                                                                                                                                                       |           |           |       |       |      |    |       |       |       |       |       |       |       |       |       |       |
| 45.59     | 13.71                                                 |                                                                                     |                                                                                                                                                                                                                                                                                                                                                                                                                                                                       |           |           |       |       |      |    |       |       |       |       |       |       |       |       |       |       |
| 48        | values from sediment<br>Prelevic <i>et al.</i> , 2008 |  | Average of 2 Data<br>$\epsilon\text{Nd} = -9.7$ $\text{SD} = 0.6$<br>$[\text{Nd}] = 96.3$ $\text{SD} = 21.7$<br><br><table><tr><th><math>\varphi</math></th><th><math>\lambda</math></th></tr><tr><td>18</td><td>34.05</td></tr></table>                                                                                                                                                                                                                              | $\varphi$ | $\lambda$ | 18    | 34.05 |      |    |       |       |       |       |       |       |       |       |       |       |
| $\varphi$ | $\lambda$                                             |                                                                                     |                                                                                                                                                                                                                                                                                                                                                                                                                                                                       |           |           |       |       |      |    |       |       |       |       |       |       |       |       |       |       |
| 18        | 34.05                                                 |                                                                                     |                                                                                                                                                                                                                                                                                                                                                                                                                                                                       |           |           |       |       |      |    |       |       |       |       |       |       |       |       |       |       |

## The Ionian sub-basin

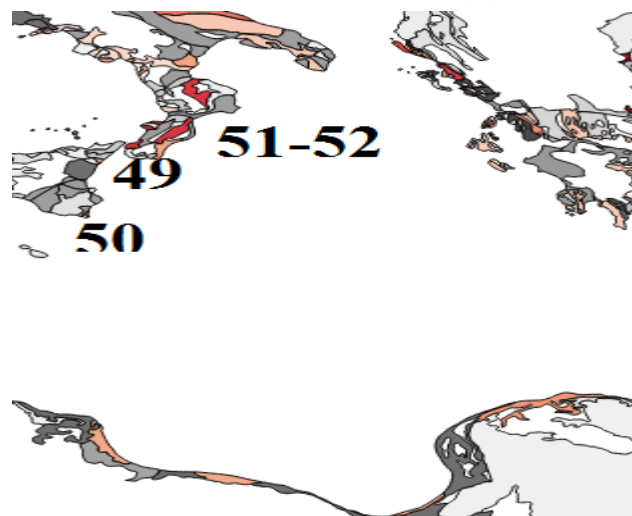

49 Bianchini *et al.*, 1999  
Scribano *et al.*, 2006  
Trua *et al.*, 1998  
Beccaluva *et al.*, 1998

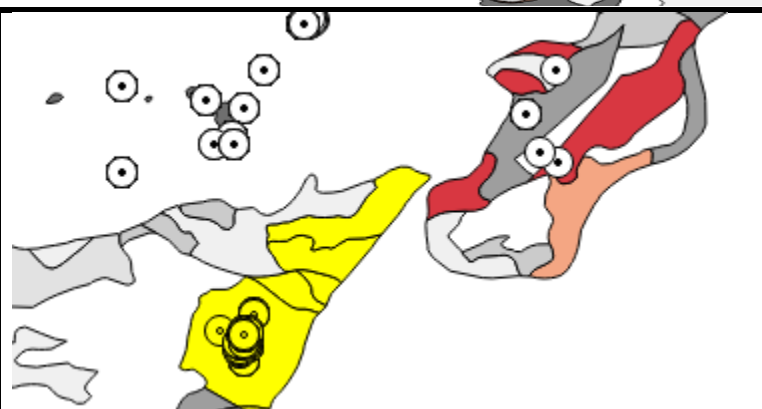

Average of 13 Data  
 $\epsilon\text{Nd} = +4.8$  SD = 1.1  
[Nd] = 50.7 SD = 22

| $\varphi$ | $\lambda$ |
|-----------|-----------|
| 37,6      | 15,0      |
| 37,8      | 15,0      |
| 37,7      | 15,0      |

| 50        | Marty <i>et al.</i> , 1994<br>Tonarini <i>et al.</i> , 1995<br>Dorazio <i>et al.</i> , 1997<br>Vicarò <i>et al.</i> , 2008<br>Carter <i>et al.</i> , 1978<br>Armienti <i>et al.</i> , 2004 | 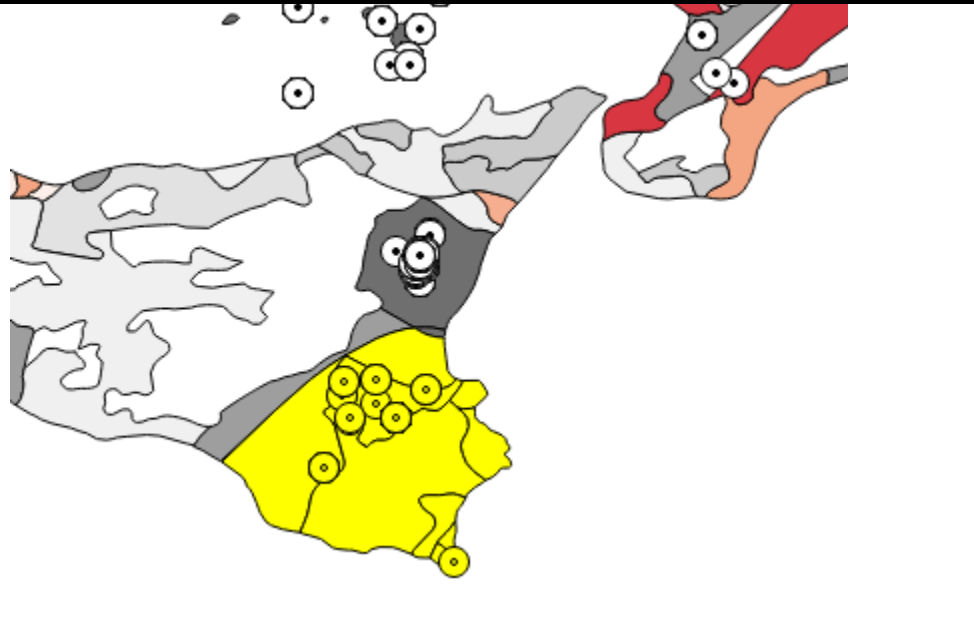  | Average of 17 Data<br>$\epsilon\text{Nd} = +7.2$ SD = 1.3<br>[Nd] = 40.7    SD = 20<br><br><table><thead><tr><th><math>\varphi</math></th><th><math>\lambda</math></th></tr></thead><tbody><tr><td>37,3</td><td>14,85</td></tr><tr><td>37,27</td><td>15,02</td></tr><tr><td>37,17</td><td>14,92</td></tr><tr><td>37</td><td>14,67</td></tr><tr><td>37,3</td><td>14,85</td></tr><tr><td>36,7</td><td>15,1</td></tr><tr><td>37,2</td><td>14,7</td></tr><tr><td>37,2</td><td>14,8</td></tr><tr><td>37,2</td><td>14,9</td></tr><tr><td>37,2</td><td>14,7</td></tr><tr><td>37,2</td><td>14,9</td></tr></tbody></table> | $\varphi$ | $\lambda$ | 37,3  | 14,85 | 37,27 | 15,02 | 37,17 | 14,92 | 37 | 14,67 | 37,3 | 14,85 | 36,7 | 15,1 | 37,2 | 14,7 | 37,2 | 14,8 | 37,2 | 14,9 | 37,2 | 14,7 | 37,2 | 14,9 |
|-----------|--------------------------------------------------------------------------------------------------------------------------------------------------------------------------------------------|-------------------------------------------------------------------------------------|-------------------------------------------------------------------------------------------------------------------------------------------------------------------------------------------------------------------------------------------------------------------------------------------------------------------------------------------------------------------------------------------------------------------------------------------------------------------------------------------------------------------------------------------------------------------------------------------------------------------|-----------|-----------|-------|-------|-------|-------|-------|-------|----|-------|------|-------|------|------|------|------|------|------|------|------|------|------|------|------|
| $\varphi$ | $\lambda$                                                                                                                                                                                  |                                                                                     |                                                                                                                                                                                                                                                                                                                                                                                                                                                                                                                                                                                                                   |           |           |       |       |       |       |       |       |    |       |      |       |      |      |      |      |      |      |      |      |      |      |      |      |
| 37,3      | 14,85                                                                                                                                                                                      |                                                                                     |                                                                                                                                                                                                                                                                                                                                                                                                                                                                                                                                                                                                                   |           |           |       |       |       |       |       |       |    |       |      |       |      |      |      |      |      |      |      |      |      |      |      |      |
| 37,27     | 15,02                                                                                                                                                                                      |                                                                                     |                                                                                                                                                                                                                                                                                                                                                                                                                                                                                                                                                                                                                   |           |           |       |       |       |       |       |       |    |       |      |       |      |      |      |      |      |      |      |      |      |      |      |      |
| 37,17     | 14,92                                                                                                                                                                                      |                                                                                     |                                                                                                                                                                                                                                                                                                                                                                                                                                                                                                                                                                                                                   |           |           |       |       |       |       |       |       |    |       |      |       |      |      |      |      |      |      |      |      |      |      |      |      |
| 37        | 14,67                                                                                                                                                                                      |                                                                                     |                                                                                                                                                                                                                                                                                                                                                                                                                                                                                                                                                                                                                   |           |           |       |       |       |       |       |       |    |       |      |       |      |      |      |      |      |      |      |      |      |      |      |      |
| 37,3      | 14,85                                                                                                                                                                                      |                                                                                     |                                                                                                                                                                                                                                                                                                                                                                                                                                                                                                                                                                                                                   |           |           |       |       |       |       |       |       |    |       |      |       |      |      |      |      |      |      |      |      |      |      |      |      |
| 36,7      | 15,1                                                                                                                                                                                       |                                                                                     |                                                                                                                                                                                                                                                                                                                                                                                                                                                                                                                                                                                                                   |           |           |       |       |       |       |       |       |    |       |      |       |      |      |      |      |      |      |      |      |      |      |      |      |
| 37,2      | 14,7                                                                                                                                                                                       |                                                                                     |                                                                                                                                                                                                                                                                                                                                                                                                                                                                                                                                                                                                                   |           |           |       |       |       |       |       |       |    |       |      |       |      |      |      |      |      |      |      |      |      |      |      |      |
| 37,2      | 14,8                                                                                                                                                                                       |                                                                                     |                                                                                                                                                                                                                                                                                                                                                                                                                                                                                                                                                                                                                   |           |           |       |       |       |       |       |       |    |       |      |       |      |      |      |      |      |      |      |      |      |      |      |      |
| 37,2      | 14,9                                                                                                                                                                                       |                                                                                     |                                                                                                                                                                                                                                                                                                                                                                                                                                                                                                                                                                                                                   |           |           |       |       |       |       |       |       |    |       |      |       |      |      |      |      |      |      |      |      |      |      |      |      |
| 37,2      | 14,7                                                                                                                                                                                       |                                                                                     |                                                                                                                                                                                                                                                                                                                                                                                                                                                                                                                                                                                                                   |           |           |       |       |       |       |       |       |    |       |      |       |      |      |      |      |      |      |      |      |      |      |      |      |
| 37,2      | 14,9                                                                                                                                                                                       |                                                                                     |                                                                                                                                                                                                                                                                                                                                                                                                                                                                                                                                                                                                                   |           |           |       |       |       |       |       |       |    |       |      |       |      |      |      |      |      |      |      |      |      |      |      |      |
| 51        | Hawkesworth <i>et al.</i> , 1979                                                                                                                                                           |  | $\epsilon\text{Nd} = +3.8$<br>[Nd] = 117<br><br><table><thead><tr><th><math>\varphi</math></th><th><math>\lambda</math></th></tr></thead><tbody><tr><td>38.32</td><td>16.08</td></tr></tbody></table>                                                                                                                                                                                                                                                                                                                                                                                                             | $\varphi$ | $\lambda$ | 38.32 | 16.08 |       |       |       |       |    |       |      |       |      |      |      |      |      |      |      |      |      |      |      |      |
| $\varphi$ | $\lambda$                                                                                                                                                                                  |                                                                                     |                                                                                                                                                                                                                                                                                                                                                                                                                                                                                                                                                                                                                   |           |           |       |       |       |       |       |       |    |       |      |       |      |      |      |      |      |      |      |      |      |      |      |      |
| 38.32     | 16.08                                                                                                                                                                                      |                                                                                     |                                                                                                                                                                                                                                                                                                                                                                                                                                                                                                                                                                                                                   |           |           |       |       |       |       |       |       |    |       |      |       |      |      |      |      |      |      |      |      |      |      |      |      |

|    |                              |                                                                                    |                                                                                                                                                                                                                                                   |
|----|------------------------------|------------------------------------------------------------------------------------|---------------------------------------------------------------------------------------------------------------------------------------------------------------------------------------------------------------------------------------------------|
| 52 | Rottura <i>et al.</i> , 1991 |  | <p>Average of 7 Data<br/> <math>\epsilon\text{Nd} = -9.8</math>   <math>\text{SD} = 1.2</math><br/> <math>[\text{Nd}] = 33.2</math>   <math>\text{SD} = 11.6</math></p> <p><math>\varphi</math>      <math>\lambda</math><br/> 39.5      16,0</p> |
|----|------------------------------|------------------------------------------------------------------------------------|---------------------------------------------------------------------------------------------------------------------------------------------------------------------------------------------------------------------------------------------------|

## Aegean sub-basin

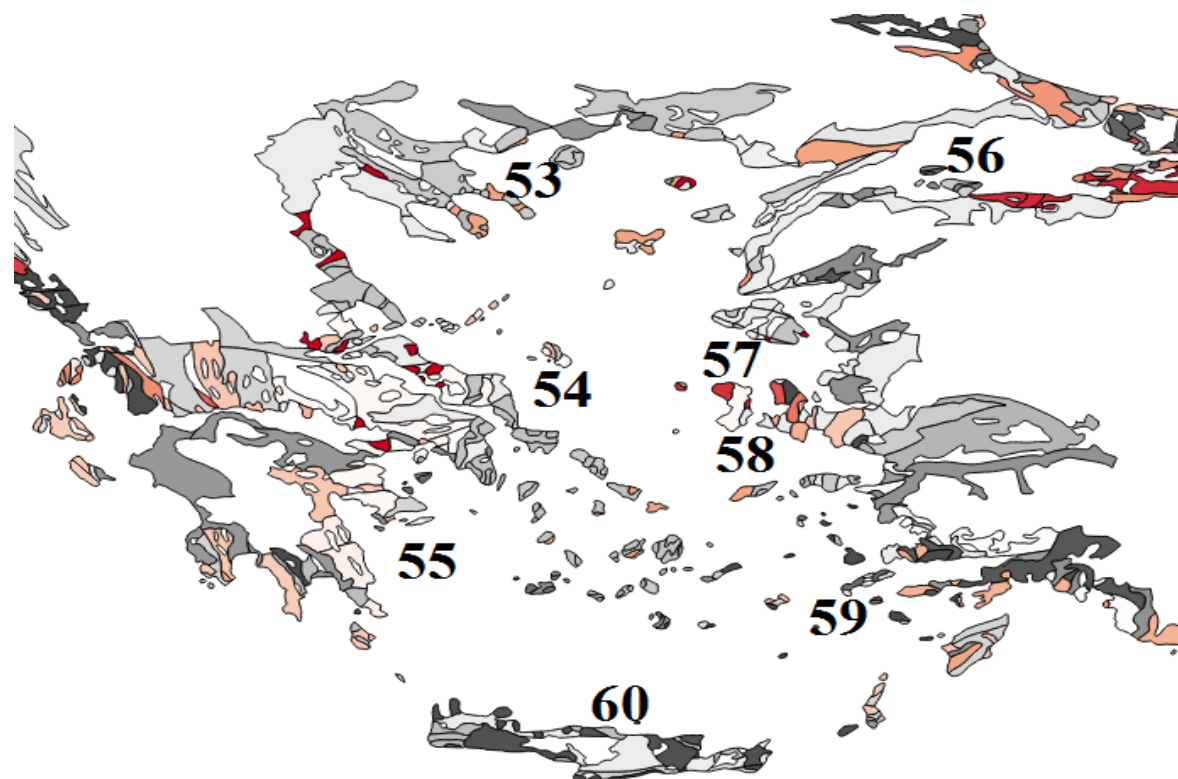

|           |                                                                                                                                    |                                                                                     |                                                                                                                                                                                                                                                                                                                                                                                                                                                                                                                 |           |           |      |      |      |      |      |      |      |      |      |      |      |      |      |      |
|-----------|------------------------------------------------------------------------------------------------------------------------------------|-------------------------------------------------------------------------------------|-----------------------------------------------------------------------------------------------------------------------------------------------------------------------------------------------------------------------------------------------------------------------------------------------------------------------------------------------------------------------------------------------------------------------------------------------------------------------------------------------------------------|-----------|-----------|------|------|------|------|------|------|------|------|------|------|------|------|------|------|
| 53        | Kirchenbaur <i>et al.</i> ,2012                                                                                                    | 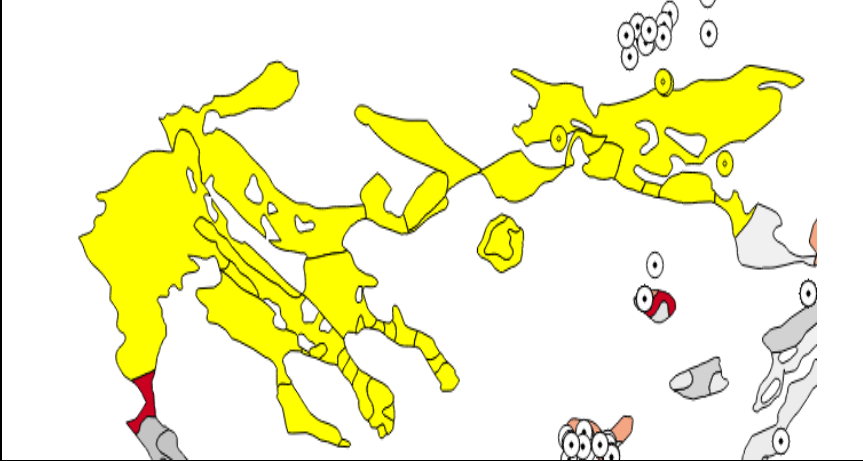  | <p>Average of 7 Data</p> <p><math>\epsilon\text{Nd} = -3.1</math>    <math>\text{SD} = 0.4</math><br/><math>[\text{Nd}] = 28.7</math>    <math>\text{SD} = 2</math></p> <table><tr><td><math>\varphi</math></td><td><math>\lambda</math></td></tr><tr><td>41</td><td>26,0</td></tr><tr><td>41.1</td><td>25,0</td></tr><tr><td>41.3</td><td>25.6</td></tr></table>                                                                                                                                               | $\varphi$ | $\lambda$ | 41   | 26,0 | 41.1 | 25,0 | 41.3 | 25.6 |      |      |      |      |      |      |      |      |
| $\varphi$ | $\lambda$                                                                                                                          |                                                                                     |                                                                                                                                                                                                                                                                                                                                                                                                                                                                                                                 |           |           |      |      |      |      |      |      |      |      |      |      |      |      |      |      |
| 41        | 26,0                                                                                                                               |                                                                                     |                                                                                                                                                                                                                                                                                                                                                                                                                                                                                                                 |           |           |      |      |      |      |      |      |      |      |      |      |      |      |      |      |
| 41.1      | 25,0                                                                                                                               |                                                                                     |                                                                                                                                                                                                                                                                                                                                                                                                                                                                                                                 |           |           |      |      |      |      |      |      |      |      |      |      |      |      |      |      |
| 41.3      | 25.6                                                                                                                               |                                                                                     |                                                                                                                                                                                                                                                                                                                                                                                                                                                                                                                 |           |           |      |      |      |      |      |      |      |      |      |      |      |      |      |      |
| 54        | Mitropoulos <i>et al.</i> , 1987<br>Innocenti <i>et al.</i> , 1979<br>Clift <i>et al.</i> , 1999<br>Innocenti <i>et al.</i> , 1981 |  | <p>Average of 9 Data</p> <p><math>\epsilon\text{Nd} = -3.8</math>    <math>\text{SD} = 0.5</math><br/><math>[\text{Nd}] = 29.7</math>    <math>\text{SD} = 7</math></p> <table><tr><td><math>\varphi</math></td><td><math>\lambda</math></td></tr><tr><td>37,8</td><td>23,4</td></tr><tr><td>37,6</td><td>23,4</td></tr><tr><td>37,5</td><td>23,5</td></tr><tr><td>38,5</td><td>23,0</td></tr><tr><td>38,5</td><td>24,0</td></tr><tr><td>38,8</td><td>22,5</td></tr><tr><td>37,9</td><td>23,1</td></tr></table> | $\varphi$ | $\lambda$ | 37,8 | 23,4 | 37,6 | 23,4 | 37,5 | 23,5 | 38,5 | 23,0 | 38,5 | 24,0 | 38,8 | 22,5 | 37,9 | 23,1 |
| $\varphi$ | $\lambda$                                                                                                                          |                                                                                     |                                                                                                                                                                                                                                                                                                                                                                                                                                                                                                                 |           |           |      |      |      |      |      |      |      |      |      |      |      |      |      |      |
| 37,8      | 23,4                                                                                                                               |                                                                                     |                                                                                                                                                                                                                                                                                                                                                                                                                                                                                                                 |           |           |      |      |      |      |      |      |      |      |      |      |      |      |      |      |
| 37,6      | 23,4                                                                                                                               |                                                                                     |                                                                                                                                                                                                                                                                                                                                                                                                                                                                                                                 |           |           |      |      |      |      |      |      |      |      |      |      |      |      |      |      |
| 37,5      | 23,5                                                                                                                               |                                                                                     |                                                                                                                                                                                                                                                                                                                                                                                                                                                                                                                 |           |           |      |      |      |      |      |      |      |      |      |      |      |      |      |      |
| 38,5      | 23,0                                                                                                                               |                                                                                     |                                                                                                                                                                                                                                                                                                                                                                                                                                                                                                                 |           |           |      |      |      |      |      |      |      |      |      |      |      |      |      |      |
| 38,5      | 24,0                                                                                                                               |                                                                                     |                                                                                                                                                                                                                                                                                                                                                                                                                                                                                                                 |           |           |      |      |      |      |      |      |      |      |      |      |      |      |      |      |
| 38,8      | 22,5                                                                                                                               |                                                                                     |                                                                                                                                                                                                                                                                                                                                                                                                                                                                                                                 |           |           |      |      |      |      |      |      |      |      |      |      |      |      |      |      |
| 37,9      | 23,1                                                                                                                               |                                                                                     |                                                                                                                                                                                                                                                                                                                                                                                                                                                                                                                 |           |           |      |      |      |      |      |      |      |      |      |      |      |      |      |      |

|    |                                                                                                                                                             |                                                                                     |                                                                                                                                                                                      |
|----|-------------------------------------------------------------------------------------------------------------------------------------------------------------|-------------------------------------------------------------------------------------|--------------------------------------------------------------------------------------------------------------------------------------------------------------------------------------|
| 55 | Pepiper <i>et al.</i> , 1998                                                                                                                                | 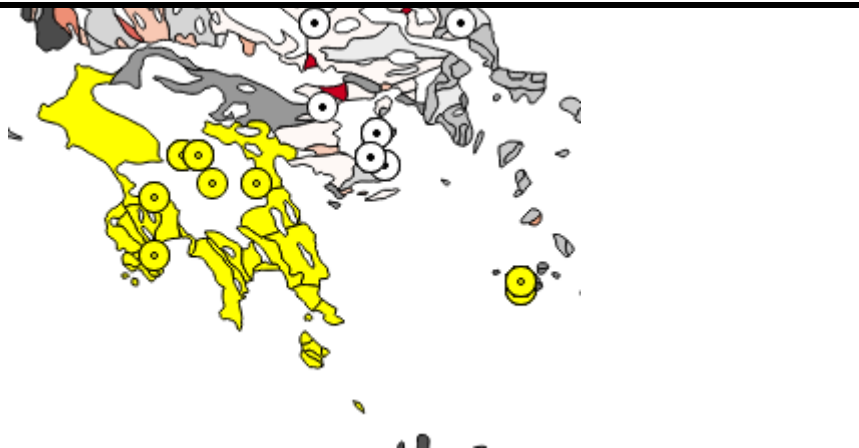  | $\epsilon\text{Nd} = -4.4$<br>[Nd] = 54.1<br><br>$\varphi$ $\lambda$<br>36.7                      24.4                                                                               |
| 56 | Exchange with the black sea<br>Genc <i>et al</i> 1998<br>Aldanmaz <i>et al.</i> , 2000<br><br>We don't represented data from :<br>Genc <i>et al.</i> , 1998 |  | Average of 2 Data<br><br>$\epsilon\text{Nd} = -6.3$ SD = 0.2<br>[Nd] = 60    SD = 7<br><br>$\varphi$ $\lambda$<br>40,71                      26,9<br>40,72                      26,9 |

| 57        | Aldanmaz <i>et al.</i> , 2000<br>Innocenti <i>et al.</i> , 2005 |   | Average of 13 Data<br>$\epsilon\text{Nd} = -4.9$ $\text{SD} = 0.8$<br>$[\text{Nd}] = 38$ $\text{SD} = 9$<br><br><table><tr><th><math>\varphi</math></th><th><math>\lambda</math></th></tr><tr><td>38,95</td><td>26,43</td></tr><tr><td>39</td><td>27</td></tr><tr><td>39,12</td><td>27,18</td></tr><tr><td>39,12</td><td>26,33</td></tr><tr><td>39,21</td><td>26,94</td></tr><tr><td>39,32</td><td>26,70</td></tr><tr><td>39,40</td><td>26,07</td></tr><tr><td>39,46</td><td>26,24</td></tr><tr><td>39,47</td><td>25,86</td></tr><tr><td>39,48</td><td>26,09</td></tr><tr><td>39,50</td><td>26,00</td></tr><tr><td>39,60</td><td>26,40</td></tr><tr><td>39,75</td><td>26,33</td></tr></table> | $\varphi$ | $\lambda$ | 38,95 | 26,43 | 39    | 27    | 39,12 | 27,18 | 39,12 | 26,33 | 39,21 | 26,94 | 39,32 | 26,70 | 39,40 | 26,07 | 39,46 | 26,24 | 39,47 | 25,86 | 39,48 | 26,09 | 39,50 | 26,00 | 39,60 | 26,40 | 39,75 | 26,33 |
|-----------|-----------------------------------------------------------------|-------------------------------------------------------------------------------------|-----------------------------------------------------------------------------------------------------------------------------------------------------------------------------------------------------------------------------------------------------------------------------------------------------------------------------------------------------------------------------------------------------------------------------------------------------------------------------------------------------------------------------------------------------------------------------------------------------------------------------------------------------------------------------------------------|-----------|-----------|-------|-------|-------|-------|-------|-------|-------|-------|-------|-------|-------|-------|-------|-------|-------|-------|-------|-------|-------|-------|-------|-------|-------|-------|-------|-------|
| $\varphi$ | $\lambda$                                                       |                                                                                     |                                                                                                                                                                                                                                                                                                                                                                                                                                                                                                                                                                                                                                                                                               |           |           |       |       |       |       |       |       |       |       |       |       |       |       |       |       |       |       |       |       |       |       |       |       |       |       |       |       |
| 38,95     | 26,43                                                           |                                                                                     |                                                                                                                                                                                                                                                                                                                                                                                                                                                                                                                                                                                                                                                                                               |           |           |       |       |       |       |       |       |       |       |       |       |       |       |       |       |       |       |       |       |       |       |       |       |       |       |       |       |
| 39        | 27                                                              |                                                                                     |                                                                                                                                                                                                                                                                                                                                                                                                                                                                                                                                                                                                                                                                                               |           |           |       |       |       |       |       |       |       |       |       |       |       |       |       |       |       |       |       |       |       |       |       |       |       |       |       |       |
| 39,12     | 27,18                                                           |                                                                                     |                                                                                                                                                                                                                                                                                                                                                                                                                                                                                                                                                                                                                                                                                               |           |           |       |       |       |       |       |       |       |       |       |       |       |       |       |       |       |       |       |       |       |       |       |       |       |       |       |       |
| 39,12     | 26,33                                                           |                                                                                     |                                                                                                                                                                                                                                                                                                                                                                                                                                                                                                                                                                                                                                                                                               |           |           |       |       |       |       |       |       |       |       |       |       |       |       |       |       |       |       |       |       |       |       |       |       |       |       |       |       |
| 39,21     | 26,94                                                           |                                                                                     |                                                                                                                                                                                                                                                                                                                                                                                                                                                                                                                                                                                                                                                                                               |           |           |       |       |       |       |       |       |       |       |       |       |       |       |       |       |       |       |       |       |       |       |       |       |       |       |       |       |
| 39,32     | 26,70                                                           |                                                                                     |                                                                                                                                                                                                                                                                                                                                                                                                                                                                                                                                                                                                                                                                                               |           |           |       |       |       |       |       |       |       |       |       |       |       |       |       |       |       |       |       |       |       |       |       |       |       |       |       |       |
| 39,40     | 26,07                                                           |                                                                                     |                                                                                                                                                                                                                                                                                                                                                                                                                                                                                                                                                                                                                                                                                               |           |           |       |       |       |       |       |       |       |       |       |       |       |       |       |       |       |       |       |       |       |       |       |       |       |       |       |       |
| 39,46     | 26,24                                                           |                                                                                     |                                                                                                                                                                                                                                                                                                                                                                                                                                                                                                                                                                                                                                                                                               |           |           |       |       |       |       |       |       |       |       |       |       |       |       |       |       |       |       |       |       |       |       |       |       |       |       |       |       |
| 39,47     | 25,86                                                           |                                                                                     |                                                                                                                                                                                                                                                                                                                                                                                                                                                                                                                                                                                                                                                                                               |           |           |       |       |       |       |       |       |       |       |       |       |       |       |       |       |       |       |       |       |       |       |       |       |       |       |       |       |
| 39,48     | 26,09                                                           |                                                                                     |                                                                                                                                                                                                                                                                                                                                                                                                                                                                                                                                                                                                                                                                                               |           |           |       |       |       |       |       |       |       |       |       |       |       |       |       |       |       |       |       |       |       |       |       |       |       |       |       |       |
| 39,50     | 26,00                                                           |                                                                                     |                                                                                                                                                                                                                                                                                                                                                                                                                                                                                                                                                                                                                                                                                               |           |           |       |       |       |       |       |       |       |       |       |       |       |       |       |       |       |       |       |       |       |       |       |       |       |       |       |       |
| 39,60     | 26,40                                                           |                                                                                     |                                                                                                                                                                                                                                                                                                                                                                                                                                                                                                                                                                                                                                                                                               |           |           |       |       |       |       |       |       |       |       |       |       |       |       |       |       |       |       |       |       |       |       |       |       |       |       |       |       |
| 39,75     | 26,33                                                           |                                                                                     |                                                                                                                                                                                                                                                                                                                                                                                                                                                                                                                                                                                                                                                                                               |           |           |       |       |       |       |       |       |       |       |       |       |       |       |       |       |       |       |       |       |       |       |       |       |       |       |       |       |
| 58        | Innocenti <i>et al.</i> , 2005<br>Bachmann <i>et al.</i> , 2007 |  | Average of 31 Data<br>$\epsilon\text{Nd} = -2.7$ $\text{SD} = 0.9$<br>$[\text{Nd}] = 30$ $\text{SD} = 1.2$<br><br><table><tr><th><math>\varphi</math></th><th><math>\lambda</math></th></tr><tr><td>38,69</td><td>27,23</td></tr><tr><td>38,67</td><td>26,76</td></tr><tr><td>38,67</td><td>26,45</td></tr><tr><td>38,67</td><td>26,80</td></tr><tr><td>38,53</td><td>27,29</td></tr><tr><td>38,40</td><td>26,10</td></tr><tr><td>38,33</td><td>26,77</td></tr></table>                                                                                                                                                                                                                       | $\varphi$ | $\lambda$ | 38,69 | 27,23 | 38,67 | 26,76 | 38,67 | 26,45 | 38,67 | 26,80 | 38,53 | 27,29 | 38,40 | 26,10 | 38,33 | 26,77 |       |       |       |       |       |       |       |       |       |       |       |       |
| $\varphi$ | $\lambda$                                                       |                                                                                     |                                                                                                                                                                                                                                                                                                                                                                                                                                                                                                                                                                                                                                                                                               |           |           |       |       |       |       |       |       |       |       |       |       |       |       |       |       |       |       |       |       |       |       |       |       |       |       |       |       |
| 38,69     | 27,23                                                           |                                                                                     |                                                                                                                                                                                                                                                                                                                                                                                                                                                                                                                                                                                                                                                                                               |           |           |       |       |       |       |       |       |       |       |       |       |       |       |       |       |       |       |       |       |       |       |       |       |       |       |       |       |
| 38,67     | 26,76                                                           |                                                                                     |                                                                                                                                                                                                                                                                                                                                                                                                                                                                                                                                                                                                                                                                                               |           |           |       |       |       |       |       |       |       |       |       |       |       |       |       |       |       |       |       |       |       |       |       |       |       |       |       |       |
| 38,67     | 26,45                                                           |                                                                                     |                                                                                                                                                                                                                                                                                                                                                                                                                                                                                                                                                                                                                                                                                               |           |           |       |       |       |       |       |       |       |       |       |       |       |       |       |       |       |       |       |       |       |       |       |       |       |       |       |       |
| 38,67     | 26,80                                                           |                                                                                     |                                                                                                                                                                                                                                                                                                                                                                                                                                                                                                                                                                                                                                                                                               |           |           |       |       |       |       |       |       |       |       |       |       |       |       |       |       |       |       |       |       |       |       |       |       |       |       |       |       |
| 38,53     | 27,29                                                           |                                                                                     |                                                                                                                                                                                                                                                                                                                                                                                                                                                                                                                                                                                                                                                                                               |           |           |       |       |       |       |       |       |       |       |       |       |       |       |       |       |       |       |       |       |       |       |       |       |       |       |       |       |
| 38,40     | 26,10                                                           |                                                                                     |                                                                                                                                                                                                                                                                                                                                                                                                                                                                                                                                                                                                                                                                                               |           |           |       |       |       |       |       |       |       |       |       |       |       |       |       |       |       |       |       |       |       |       |       |       |       |       |       |       |
| 38,33     | 26,77                                                           |                                                                                     |                                                                                                                                                                                                                                                                                                                                                                                                                                                                                                                                                                                                                                                                                               |           |           |       |       |       |       |       |       |       |       |       |       |       |       |       |       |       |       |       |       |       |       |       |       |       |       |       |       |

|        |                                                                                                                                                               |                                                                                     | <div><div>38,2926,81</div><div>38,0726,37</div><div>38,0027,00</div><div>37,3126,55</div><div>37,1726,44</div></div>                                                                                                                                                                                                                                                                                                                                                                                                                     |        |           |       |       |       |       |       |       |       |       |       |       |       |       |       |       |       |       |
|--------|---------------------------------------------------------------------------------------------------------------------------------------------------------------|-------------------------------------------------------------------------------------|------------------------------------------------------------------------------------------------------------------------------------------------------------------------------------------------------------------------------------------------------------------------------------------------------------------------------------------------------------------------------------------------------------------------------------------------------------------------------------------------------------------------------------------|--------|-----------|-------|-------|-------|-------|-------|-------|-------|-------|-------|-------|-------|-------|-------|-------|-------|-------|
| 59     | <div>Buettner <i>et al.</i>, 2005</div> <div>Zellmer <i>et al.</i>, 2007</div> <div>Pepiper <i>et al.</i>, 2008</div> <div>Bachmann <i>et al.</i>, 2007</div> | 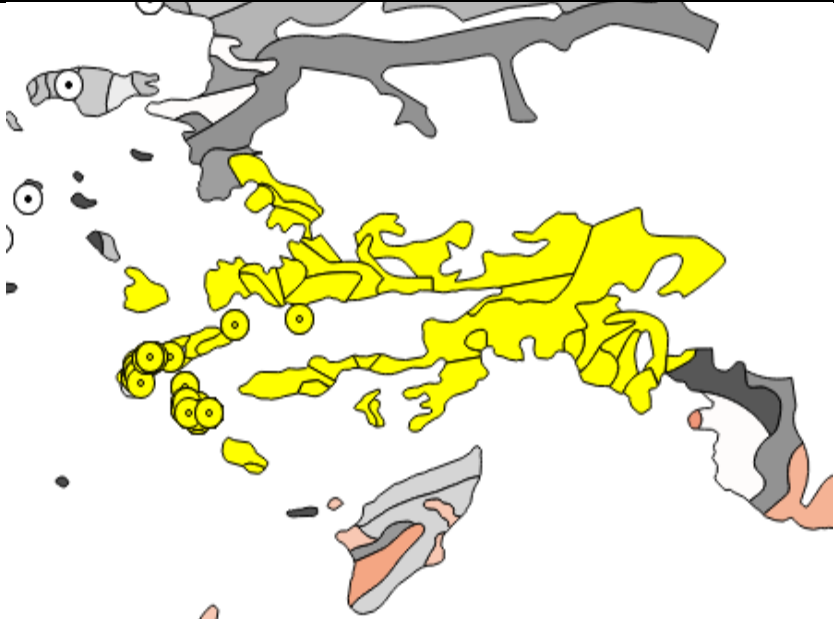 | <div>Average of 38 Data</div> <div><math>\epsilon\text{Nd} = 0.6</math>SD = 1.7</div> <div><math>[\text{Nd}] = 22</math>SD = 13</div> <div><table><tr><th><math>\phi</math></th><th><math>\lambda</math></th></tr><tr><td>36,58</td><td>27,22</td></tr><tr><td>36,58</td><td>27,15</td></tr><tr><td>36,59</td><td>27,17</td></tr><tr><td>36,72</td><td>26,96</td></tr><tr><td>36,77</td><td>27,00</td></tr><tr><td>36,77</td><td>27,08</td></tr><tr><td>36,88</td><td>27,32</td></tr><tr><td>36,90</td><td>27,56</td></tr></table></div> | $\phi$ | $\lambda$ | 36,58 | 27,22 | 36,58 | 27,15 | 36,59 | 27,17 | 36,72 | 26,96 | 36,77 | 27,00 | 36,77 | 27,08 | 36,88 | 27,32 | 36,90 | 27,56 |
| $\phi$ | $\lambda$                                                                                                                                                     |                                                                                     |                                                                                                                                                                                                                                                                                                                                                                                                                                                                                                                                          |        |           |       |       |       |       |       |       |       |       |       |       |       |       |       |       |       |       |
| 36,58  | 27,22                                                                                                                                                         |                                                                                     |                                                                                                                                                                                                                                                                                                                                                                                                                                                                                                                                          |        |           |       |       |       |       |       |       |       |       |       |       |       |       |       |       |       |       |
| 36,58  | 27,15                                                                                                                                                         |                                                                                     |                                                                                                                                                                                                                                                                                                                                                                                                                                                                                                                                          |        |           |       |       |       |       |       |       |       |       |       |       |       |       |       |       |       |       |
| 36,59  | 27,17                                                                                                                                                         |                                                                                     |                                                                                                                                                                                                                                                                                                                                                                                                                                                                                                                                          |        |           |       |       |       |       |       |       |       |       |       |       |       |       |       |       |       |       |
| 36,72  | 26,96                                                                                                                                                         |                                                                                     |                                                                                                                                                                                                                                                                                                                                                                                                                                                                                                                                          |        |           |       |       |       |       |       |       |       |       |       |       |       |       |       |       |       |       |
| 36,77  | 27,00                                                                                                                                                         |                                                                                     |                                                                                                                                                                                                                                                                                                                                                                                                                                                                                                                                          |        |           |       |       |       |       |       |       |       |       |       |       |       |       |       |       |       |       |
| 36,77  | 27,08                                                                                                                                                         |                                                                                     |                                                                                                                                                                                                                                                                                                                                                                                                                                                                                                                                          |        |           |       |       |       |       |       |       |       |       |       |       |       |       |       |       |       |       |
| 36,88  | 27,32                                                                                                                                                         |                                                                                     |                                                                                                                                                                                                                                                                                                                                                                                                                                                                                                                                          |        |           |       |       |       |       |       |       |       |       |       |       |       |       |       |       |       |       |
| 36,90  | 27,56                                                                                                                                                         |                                                                                     |                                                                                                                                                                                                                                                                                                                                                                                                                                                                                                                                          |        |           |       |       |       |       |       |       |       |       |       |       |       |       |       |       |       |       |

60

Weldeab *et al* 2002

We use the mean values proposed by  
Weldeab *et al* 2002 for all the Aegean sea

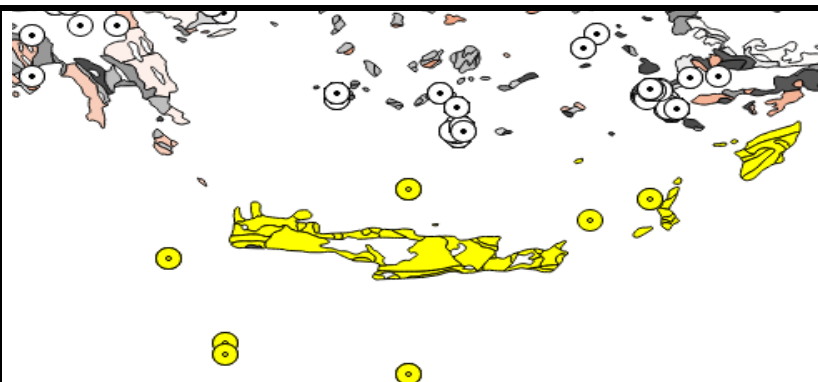

1 Data

 $\epsilon\text{Nd} = -3.2$  $[\text{Nd}] = 2$ 

### Levantine sub-basin

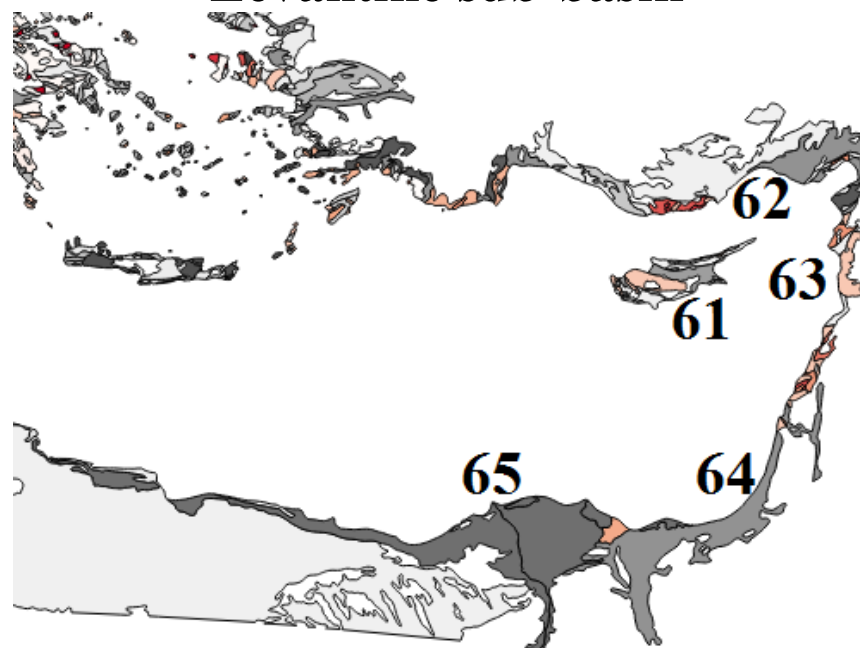

|        |                                                                |                                                                                     |                                                                                                                                                                                                                                                                                                                            |        |           |       |       |       |       |       |       |       |       |
|--------|----------------------------------------------------------------|-------------------------------------------------------------------------------------|----------------------------------------------------------------------------------------------------------------------------------------------------------------------------------------------------------------------------------------------------------------------------------------------------------------------------|--------|-----------|-------|-------|-------|-------|-------|-------|-------|-------|
| 61     | Cameron <i>et al.</i> , 1983                                   | 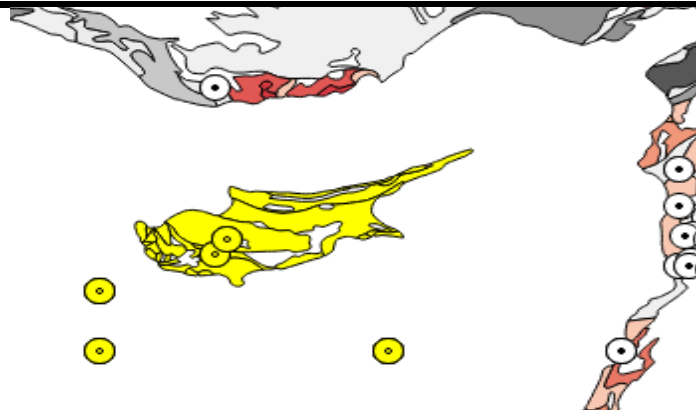  | Average of 3 Data<br>$\epsilon\text{Nd} = -10$ SD = 1.9<br>[Nd] = 2 SD = 13<br><br><table><tr><td><math>\phi</math></td><td><math>\lambda</math></td></tr><tr><td>34.92</td><td>32.88</td></tr><tr><td>34.8</td><td>32.8</td></tr><tr><td>34.92</td><td>32.88</td></tr></table>                                            | $\phi$ | $\lambda$ | 34.92 | 32.88 | 34.8  | 32.8  | 34.92 | 32.88 |       |       |
| $\phi$ | $\lambda$                                                      |                                                                                     |                                                                                                                                                                                                                                                                                                                            |        |           |       |       |       |       |       |       |       |       |
| 34.92  | 32.88                                                          |                                                                                     |                                                                                                                                                                                                                                                                                                                            |        |           |       |       |       |       |       |       |       |       |
| 34.8   | 32.8                                                           |                                                                                     |                                                                                                                                                                                                                                                                                                                            |        |           |       |       |       |       |       |       |       |       |
| 34.92  | 32.88                                                          |                                                                                     |                                                                                                                                                                                                                                                                                                                            |        |           |       |       |       |       |       |       |       |       |
| 62     | Alpaslan <i>et al.</i> , 2006                                  |  | Average of 4 Data<br>$\epsilon\text{Nd} = -6.8$ SD = 1.8<br>[Nd] = 70.3 SD = 23<br><br><table><tr><td><math>\phi</math></td><td><math>\lambda</math></td></tr><tr><td>37.55</td><td>34.53</td></tr><tr><td>37.56</td><td>34.73</td></tr><tr><td>37.57</td><td>34.61</td></tr><tr><td>37.59</td><td>34.71</td></tr></table> | $\phi$ | $\lambda$ | 37.55 | 34.53 | 37.56 | 34.73 | 37.57 | 34.61 | 37.59 | 34.71 |
| $\phi$ | $\lambda$                                                      |                                                                                     |                                                                                                                                                                                                                                                                                                                            |        |           |       |       |       |       |       |       |       |       |
| 37.55  | 34.53                                                          |                                                                                     |                                                                                                                                                                                                                                                                                                                            |        |           |       |       |       |       |       |       |       |       |
| 37.56  | 34.73                                                          |                                                                                     |                                                                                                                                                                                                                                                                                                                            |        |           |       |       |       |       |       |       |       |       |
| 37.57  | 34.61                                                          |                                                                                     |                                                                                                                                                                                                                                                                                                                            |        |           |       |       |       |       |       |       |       |       |
| 37.59  | 34.71                                                          |                                                                                     |                                                                                                                                                                                                                                                                                                                            |        |           |       |       |       |       |       |       |       |       |
| 63     | Abdelrahman <i>et al.</i> , 2002<br>Stein <i>et al.</i> , 1992 |                                                                                     | Average of 6 Data<br>$\epsilon\text{Nd} = +4.3$ SD = 1.5<br>[Nd] = 30.3 SD = 12                                                                                                                                                                                                                                            |        |           |       |       |       |       |       |       |       |       |

|  |  |                                                                                    |                                                         |                                                            |
|--|--|------------------------------------------------------------------------------------|---------------------------------------------------------|------------------------------------------------------------|
|  |  |  | $\phi$<br>35.5<br>34<br>34.9<br>34.93<br>34.73<br>34.70 | $\lambda$<br>36<br>35.6<br>36.2<br>36.17<br>36.08<br>36.07 |
|--|--|------------------------------------------------------------------------------------|---------------------------------------------------------|------------------------------------------------------------|

|        |                                                                                                                                 |                                                                                     |                                                                                                                                                                                                                                                                                                                                                                                   |        |           |    |    |      |       |      |       |      |       |      |       |
|--------|---------------------------------------------------------------------------------------------------------------------------------|-------------------------------------------------------------------------------------|-----------------------------------------------------------------------------------------------------------------------------------------------------------------------------------------------------------------------------------------------------------------------------------------------------------------------------------------------------------------------------------|--------|-----------|----|----|------|-------|------|-------|------|-------|------|-------|
| 64     | Weinstein <i>et al.</i> , 2006<br>Krienitz <i>et al.</i> , 2007<br>Stein <i>et al.</i> , 1992<br>Tachikawa <i>et al.</i> , 2004 | 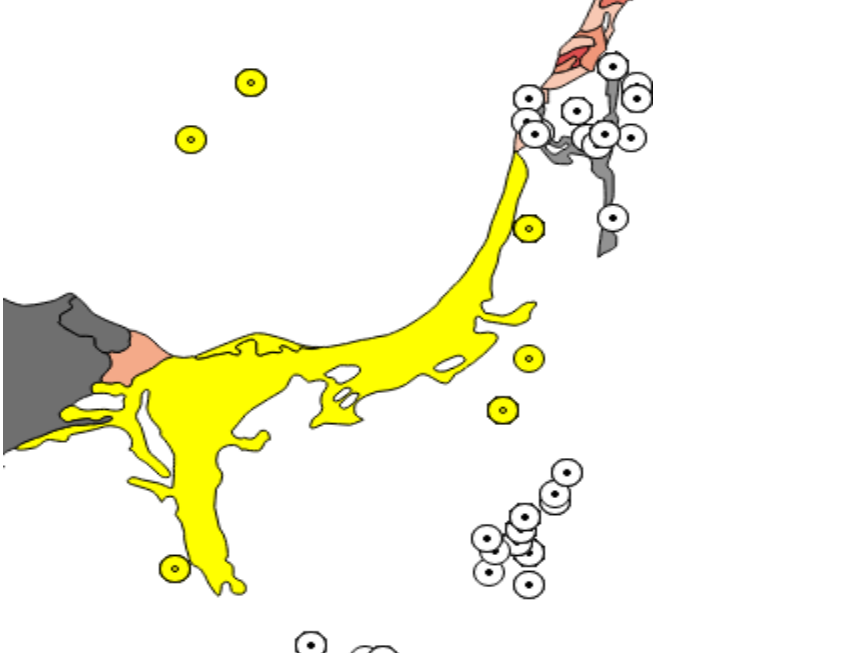  | Average of 21 Data<br>$\epsilon\text{Nd} = +4.3$ $\text{SD} = 1.5$<br>$[\text{Nd}] = 30.3$ $\text{SD} = 12$<br><br><table><tr><td><math>\phi</math></td><td><math>\lambda</math></td></tr><tr><td>32</td><td>35</td></tr><tr><td>32,6</td><td>32,68</td></tr><tr><td>30,6</td><td>34,82</td></tr><tr><td>30,6</td><td>34,82</td></tr><tr><td>30,6</td><td>34,82</td></tr></table> | $\phi$ | $\lambda$ | 32 | 35 | 32,6 | 32,68 | 30,6 | 34,82 | 30,6 | 34,82 | 30,6 | 34,82 |
| $\phi$ | $\lambda$                                                                                                                       |                                                                                     |                                                                                                                                                                                                                                                                                                                                                                                   |        |           |    |    |      |       |      |       |      |       |      |       |
| 32     | 35                                                                                                                              |                                                                                     |                                                                                                                                                                                                                                                                                                                                                                                   |        |           |    |    |      |       |      |       |      |       |      |       |
| 32,6   | 32,68                                                                                                                           |                                                                                     |                                                                                                                                                                                                                                                                                                                                                                                   |        |           |    |    |      |       |      |       |      |       |      |       |
| 30,6   | 34,82                                                                                                                           |                                                                                     |                                                                                                                                                                                                                                                                                                                                                                                   |        |           |    |    |      |       |      |       |      |       |      |       |
| 30,6   | 34,82                                                                                                                           |                                                                                     |                                                                                                                                                                                                                                                                                                                                                                                   |        |           |    |    |      |       |      |       |      |       |      |       |
| 30,6   | 34,82                                                                                                                           |                                                                                     |                                                                                                                                                                                                                                                                                                                                                                                   |        |           |    |    |      |       |      |       |      |       |      |       |
| 65     | Tachikawa, <i>et al</i> 2004                                                                                                    |  | Average of 2 Data<br>$\epsilon\text{Nd} = -4$ $\text{SD} = 1.9$<br>$[\text{Nd}] = 60$                                                                                                                                                                                                                                                                                             |        |           |    |    |      |       |      |       |      |       |      |       |

# Atlantic

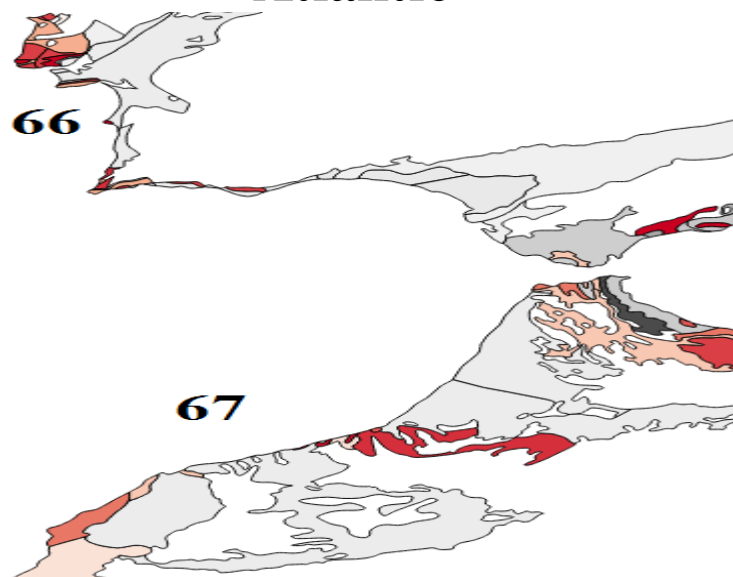

66

Jeandel *et al.*, 2007  
Sanchez-Garcia *et al.*, 2010

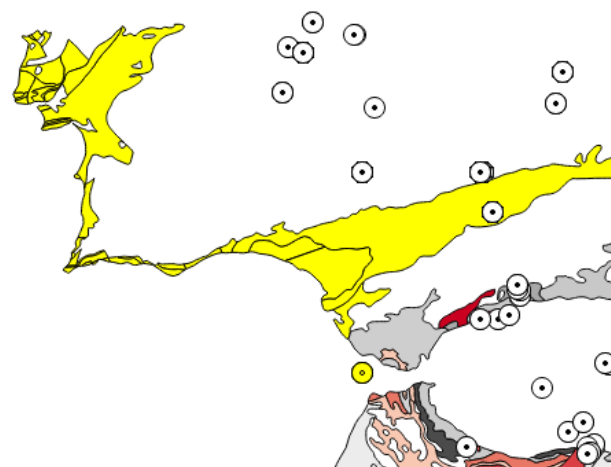

$\epsilon\text{Nd} = -9$   
[Nd] = 49.7 SD = 24.3

|        |           |
|--------|-----------|
| $\phi$ | $\lambda$ |
| 36     | -6        |

|    |                                                             |                                                                                    |                                                                                                 |
|----|-------------------------------------------------------------|------------------------------------------------------------------------------------|-------------------------------------------------------------------------------------------------|
| 67 | Jeandel <i>et al.</i> , 2007<br>Duggen <i>et al.</i> , 2009 | 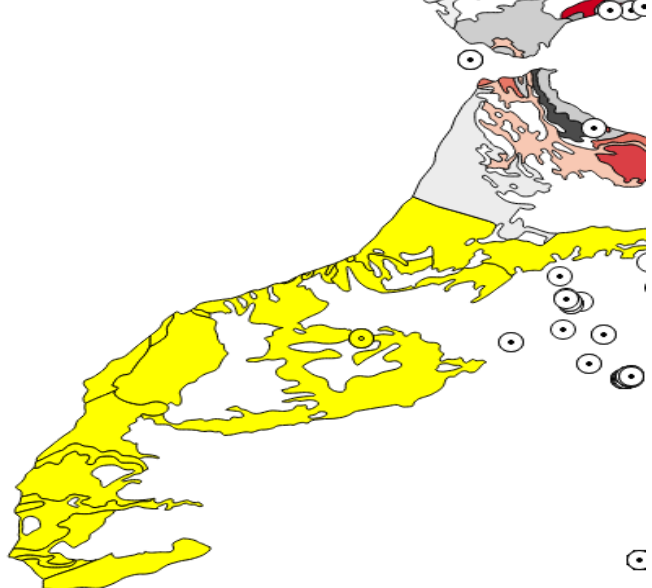 | $\epsilon\text{Nd} = -12$<br>[Nd] = 60 SD = 14<br><br>$\phi$<br>32.97<br><br>$\lambda$<br>-6.93 |
|----|-------------------------------------------------------------|------------------------------------------------------------------------------------|-------------------------------------------------------------------------------------------------|

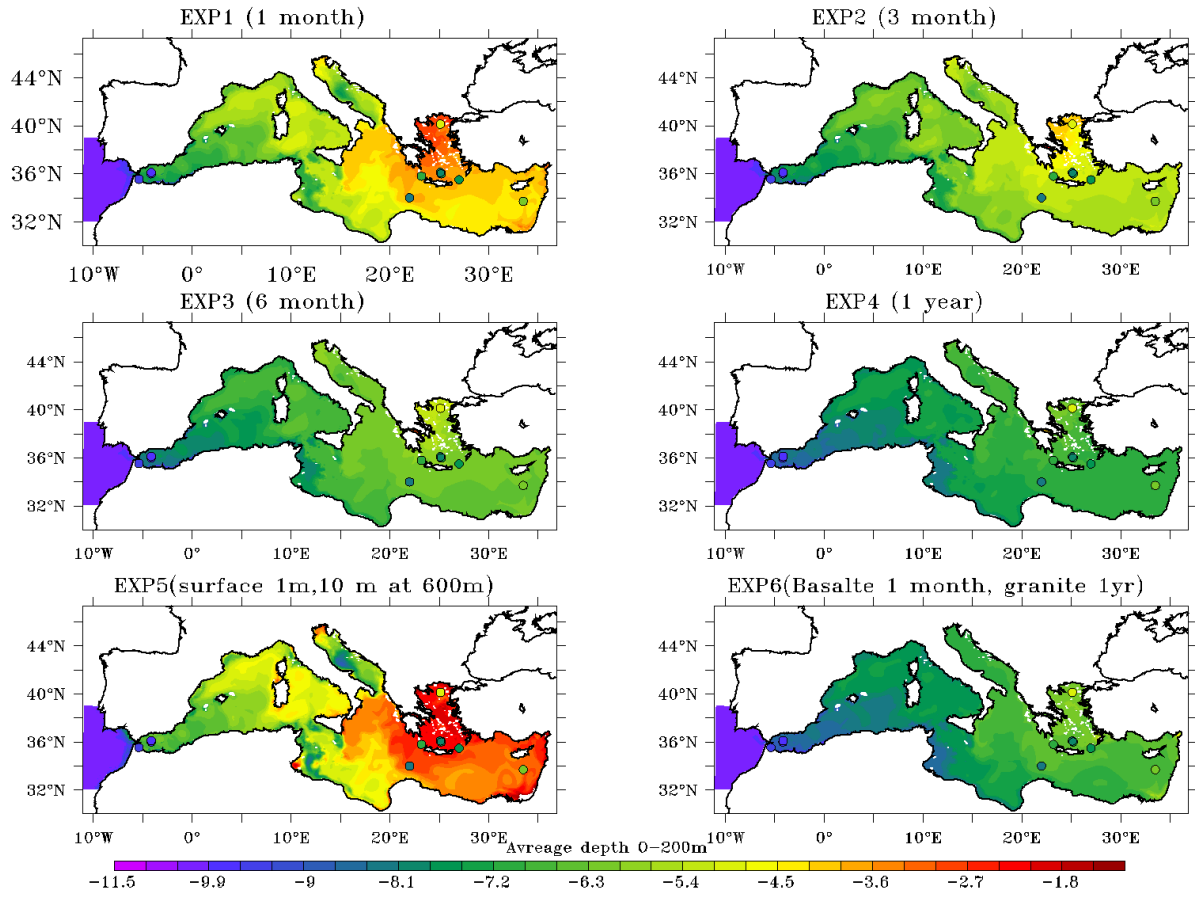

**Appendix 2:** Horizontal  $\epsilon\text{Nd}$  map averaged between 0 and 200 m for simulations EXP1, EXP2, EXP3, EXP4, EXP5 and EXP6, i.e. for  $\tau=1$  month, 3 months, 6 months, 1 year,  $\tau$  varying vertically, and  $\tau=1$  month (max  $\epsilon\text{Nd}_{\text{mar}}$ ) to 1 year (min  $\epsilon\text{Nd}_{\text{margin}}$ ). Superimposed to these maps are filled circles with the same color scheme for the  $\epsilon\text{Nd}$  data from the compilation done by Tachikawa et al., 2004 averaged between the same depths.

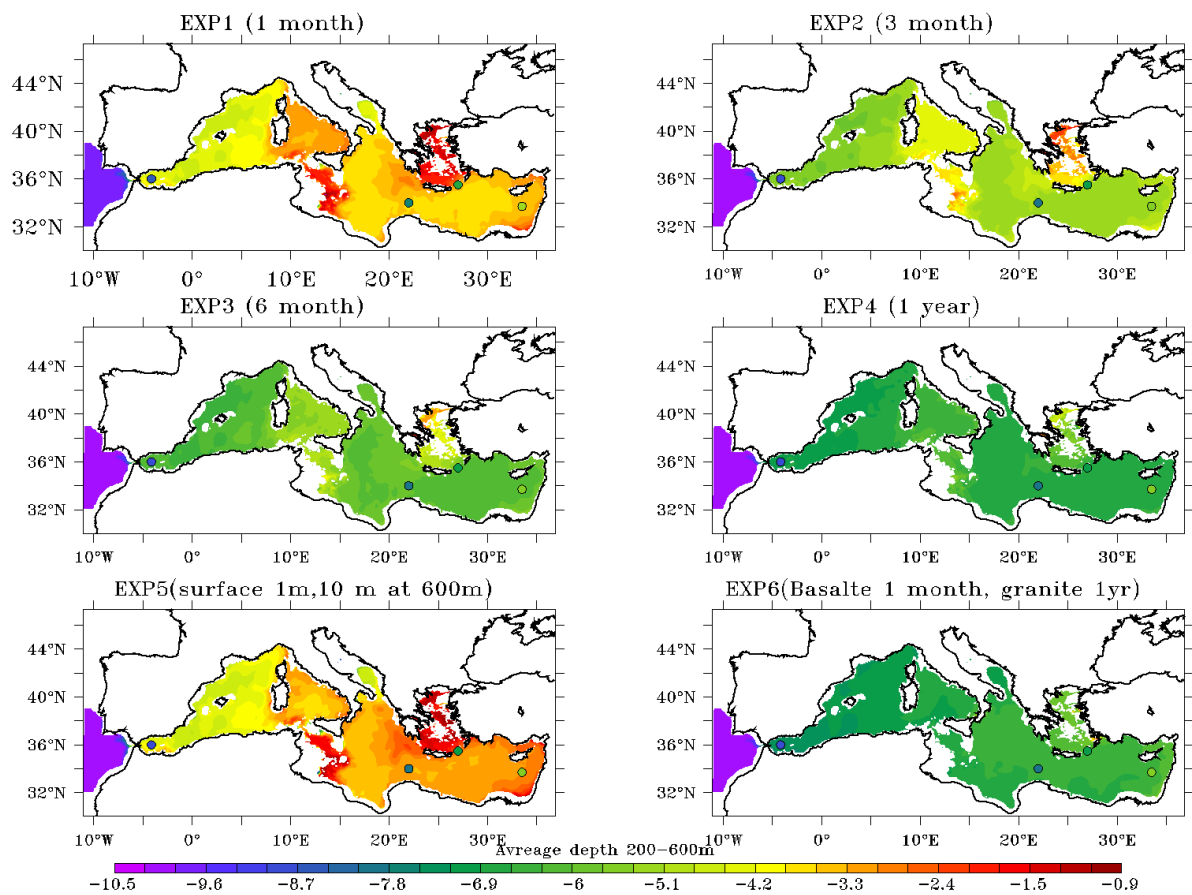

**Appendix 3:** Same as Appendix A1, but between 200 and 600 m depth.

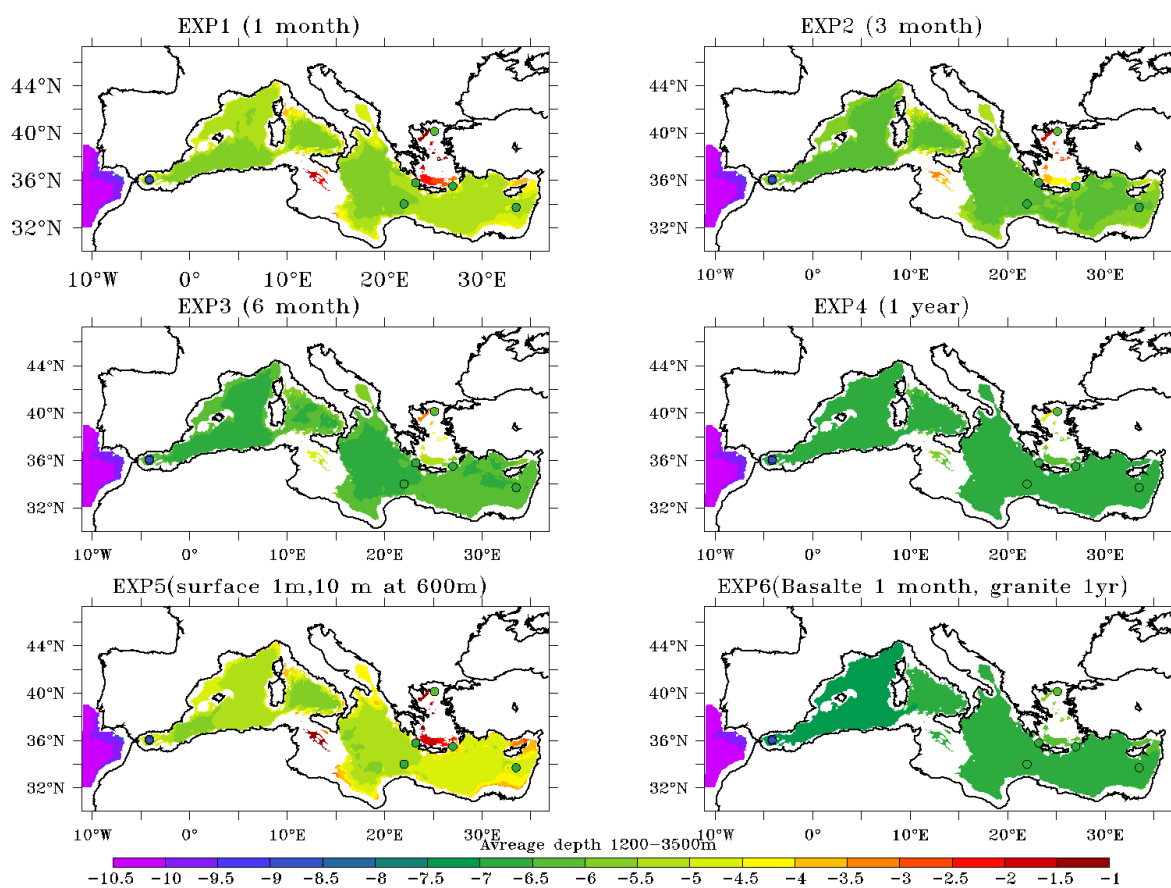

**Appendix 4:** Same as Appendix A1, but between 600 and 3500 m depth.

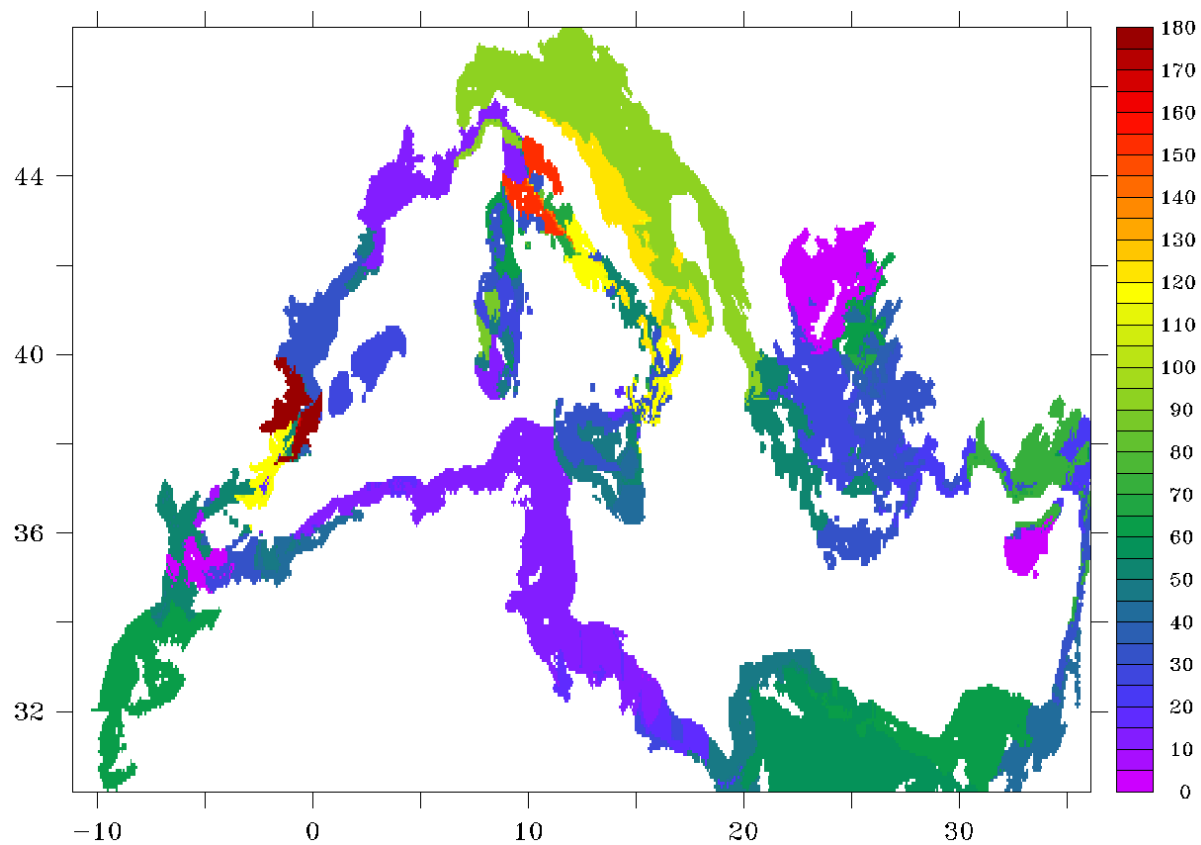

**Appendix 5:** Map of Nd concentration of margins (in  $\mu\text{g/g}$ ), of all the margins surrounding the Mediterranean Sea
