# Supplementary material for: High-resolution neodymium characterization along the Mediterranean margins and modelling of ε Nd distribution in the Mediterranean basins
Source: Copernicus journal article supplement (doi:10.5194/bg-13-5259-2016), 2016-09-22
Supplement: Supplementary file 2 [file bg-13-5259-2016-supplement.zip]

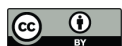

*Supplement of*

**High-resolution neodymium characterization  
along the Mediterranean margins and modelling  
of  $\epsilon_{Nd}$  distribution in the Mediterranean basins**

**Mohamed Ayache et al.**

*Correspondence to:* Mohamed Ayache ([mohamed.ayache@lsce.ipsl.fr](mailto:mohamed.ayache@lsce.ipsl.fr))

- [bg-13-5259-2016-supplement-title-page.pdf](#)
- [Appendix\\_v3\\_after\\_Referee.pdf](#)
- [References.xls](#)

The copyright of individual parts of the supplement might differ from the CC-BY 3.0 licence.
